# Supplementary material for: Universal annotation of the human genome through integration of over a thousand epigenomic datasets
Source: PubMed Central journal article supplement (PMC8734071; doi:10.1186/s13059-021-02572-z), 2022-01-06

# Acet1

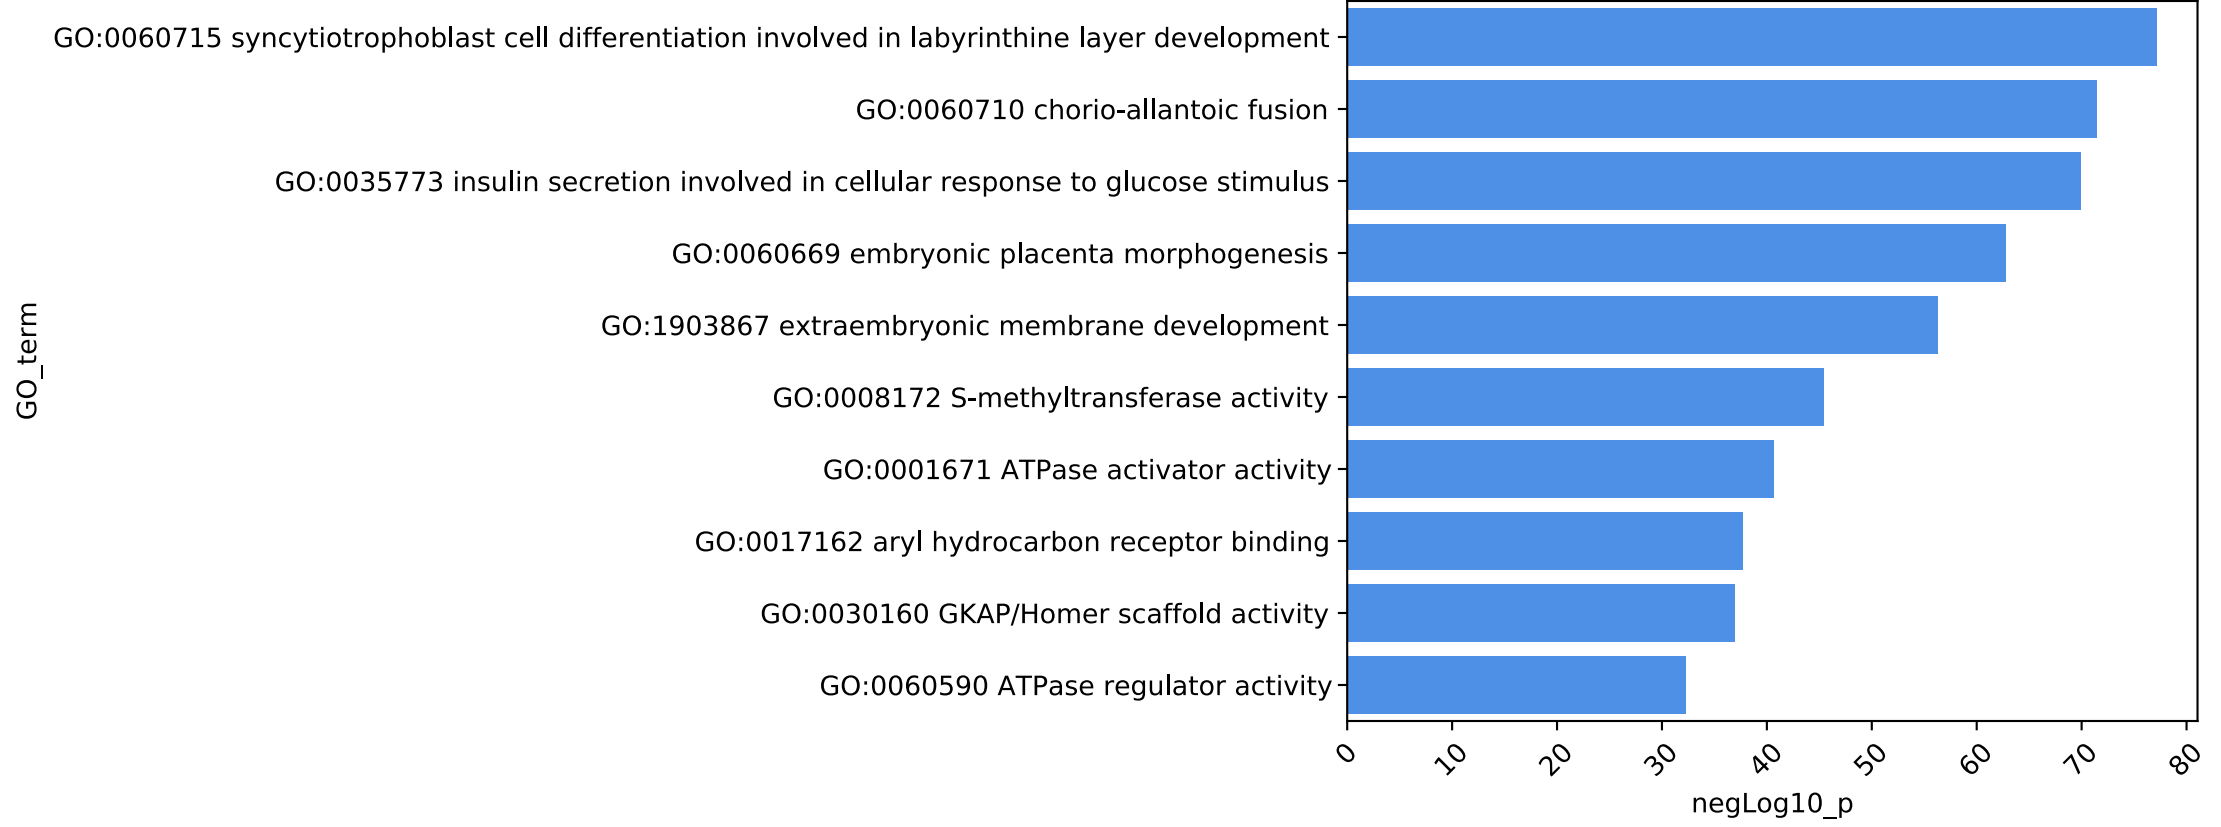

# Acet2

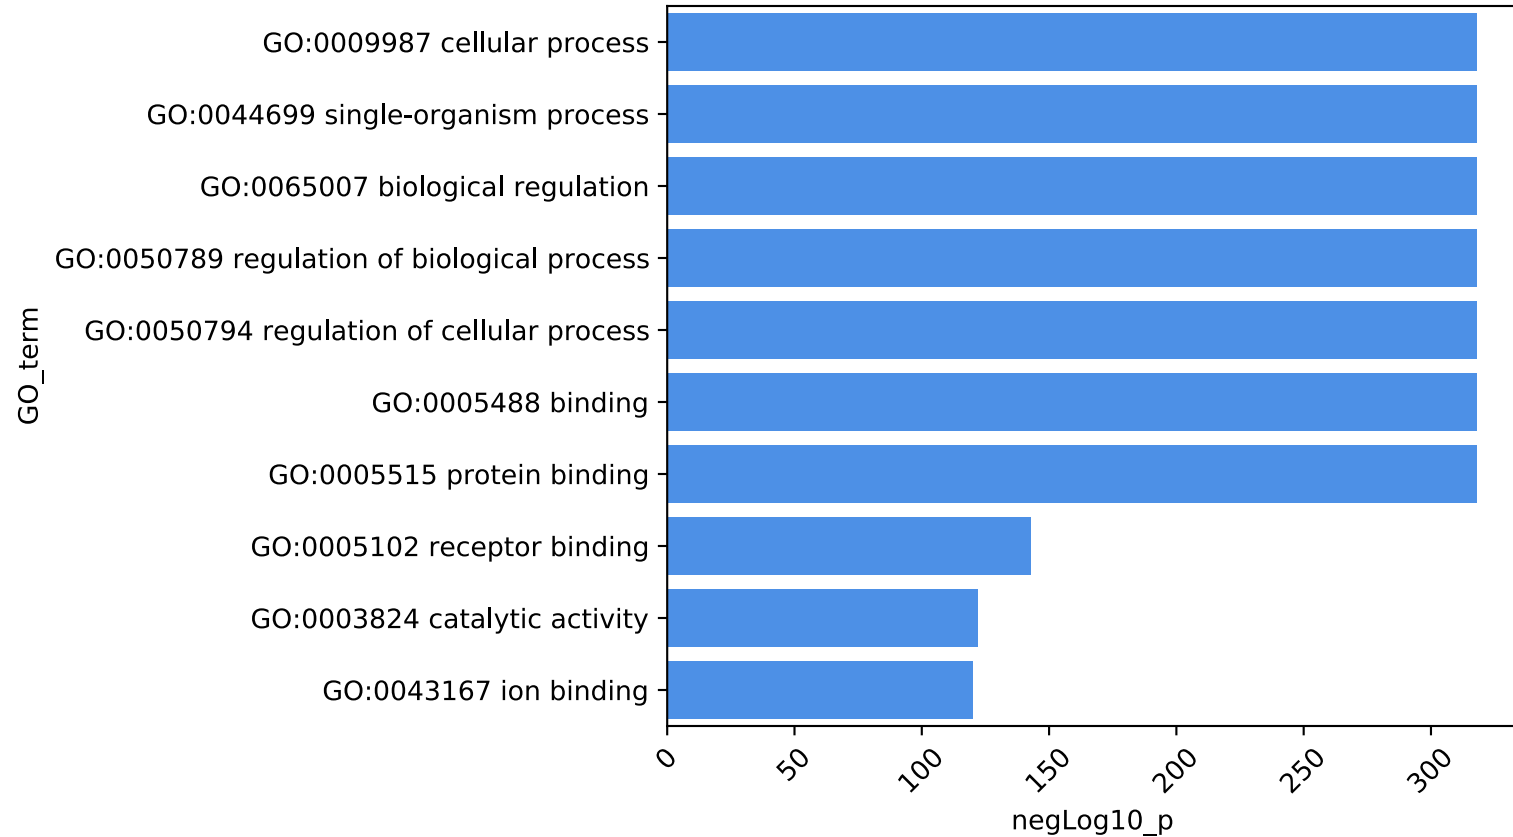

## Acet3

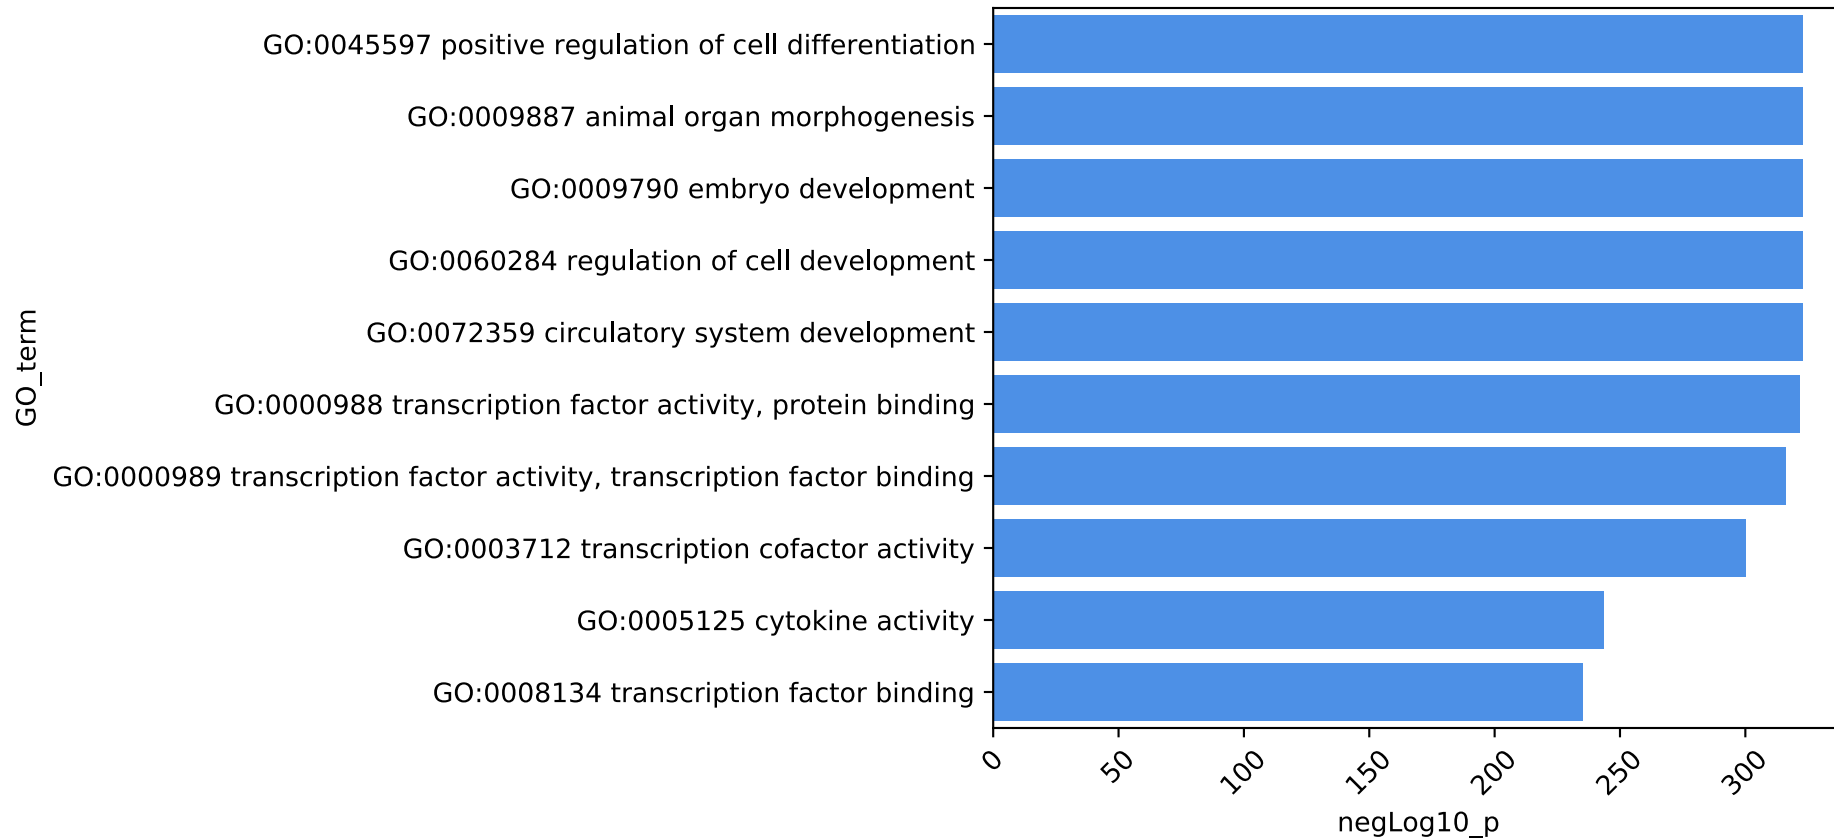

# Acet4

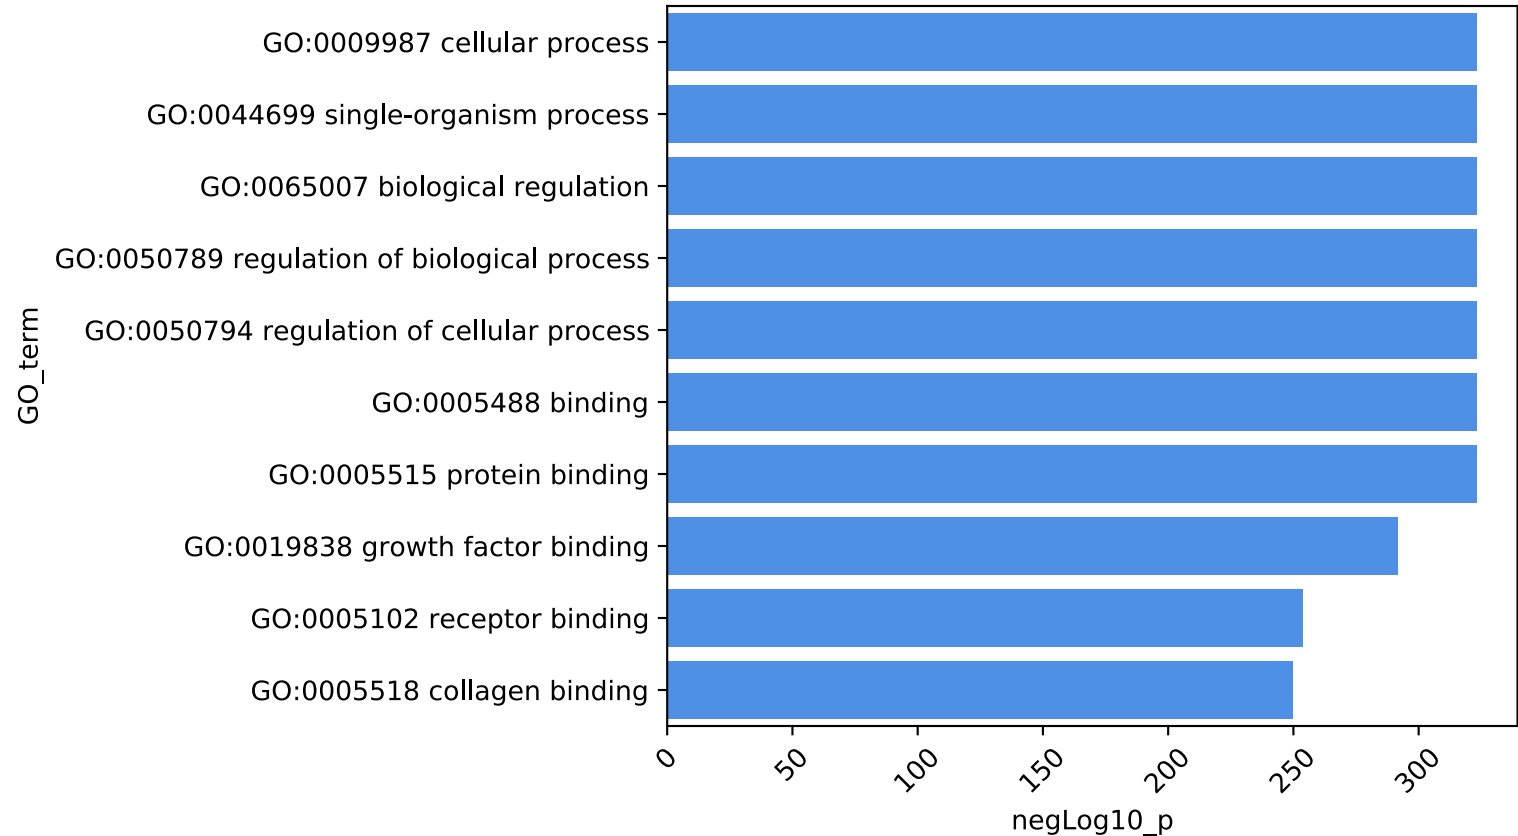

# Acet5

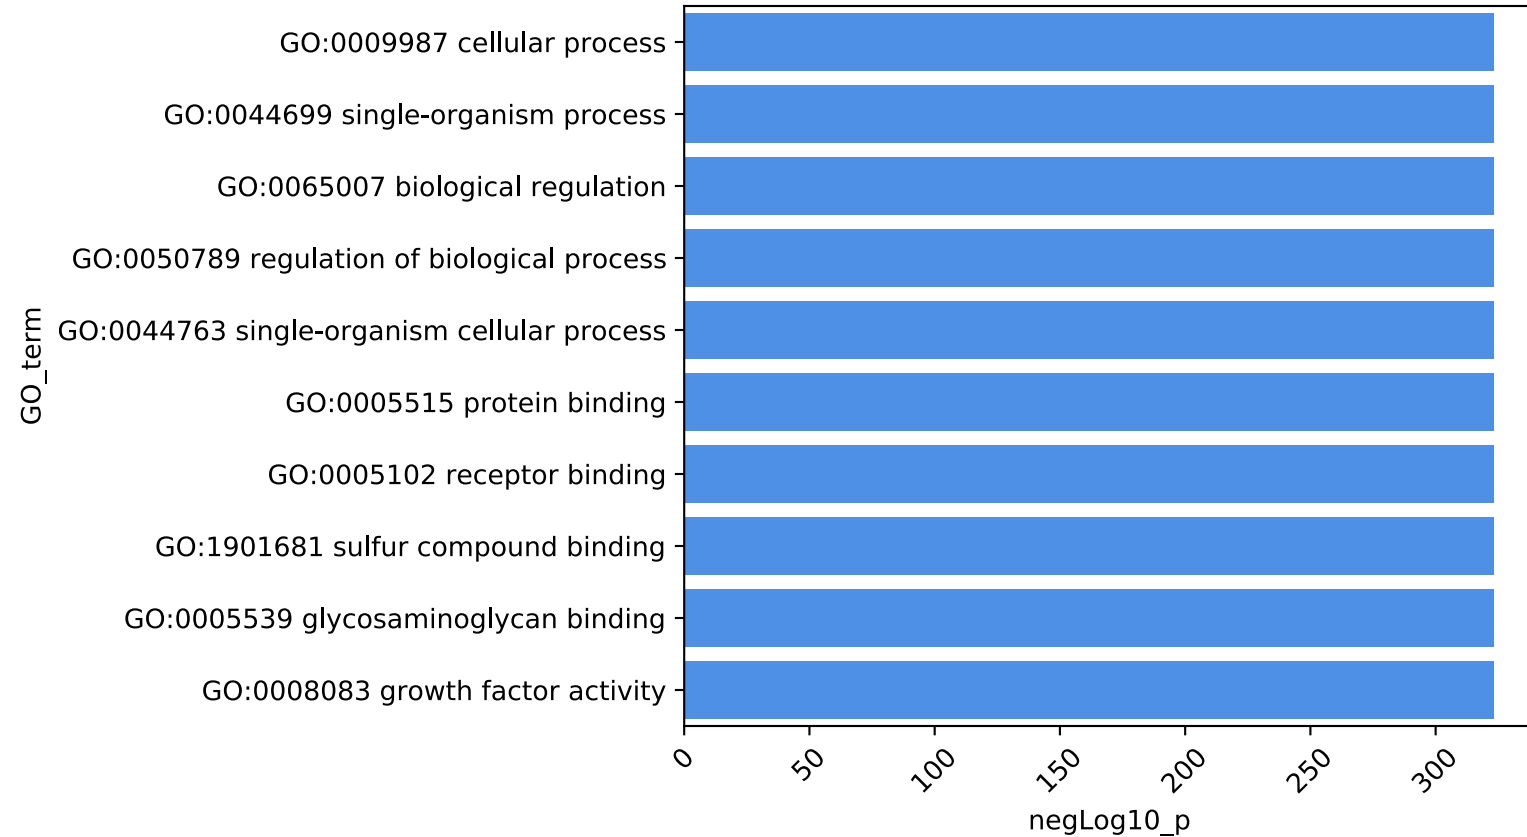

# Acet6

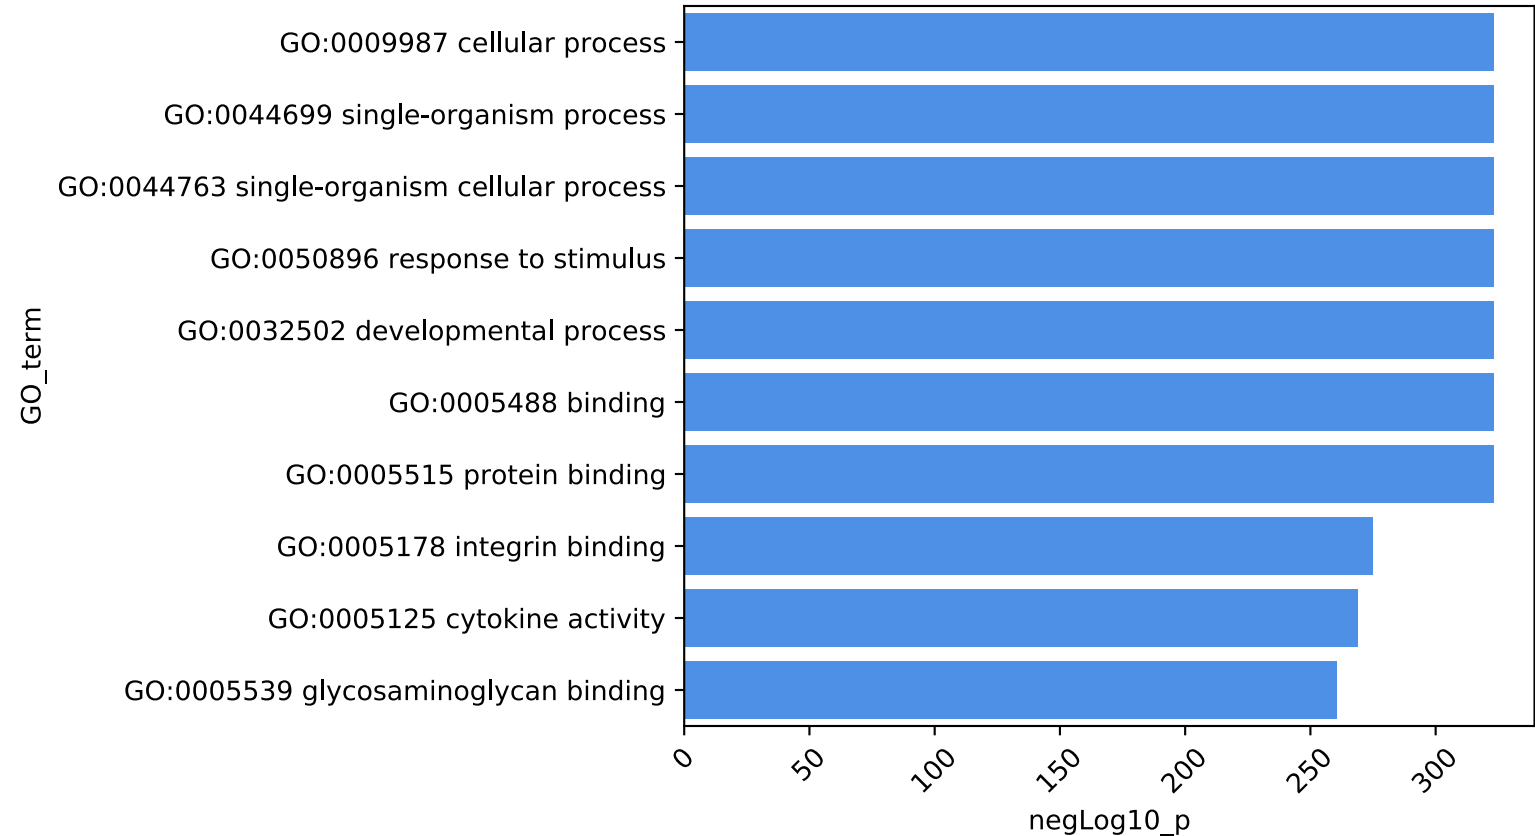

# Acet7

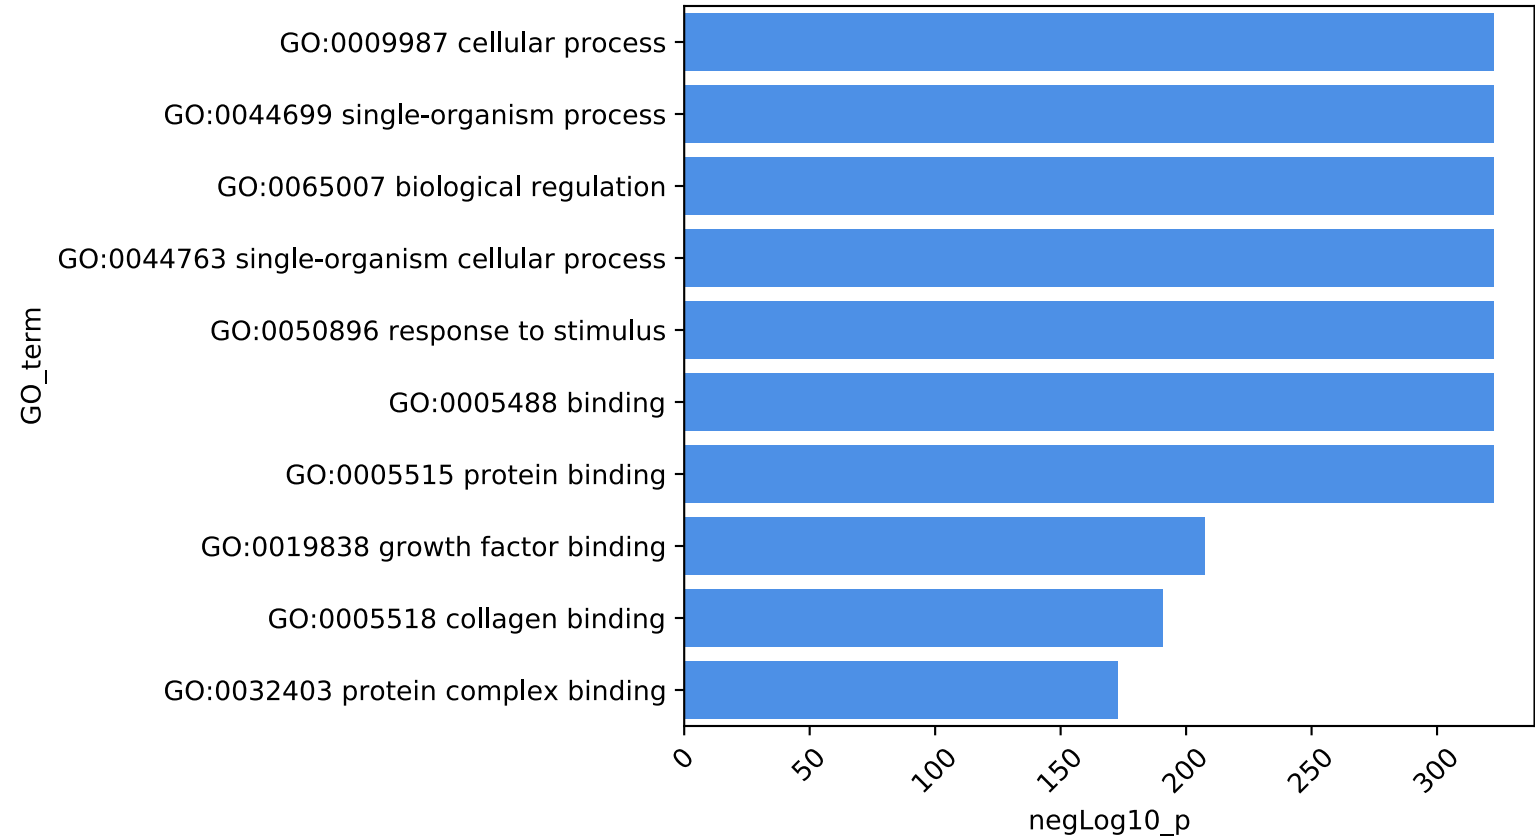

# Acet8

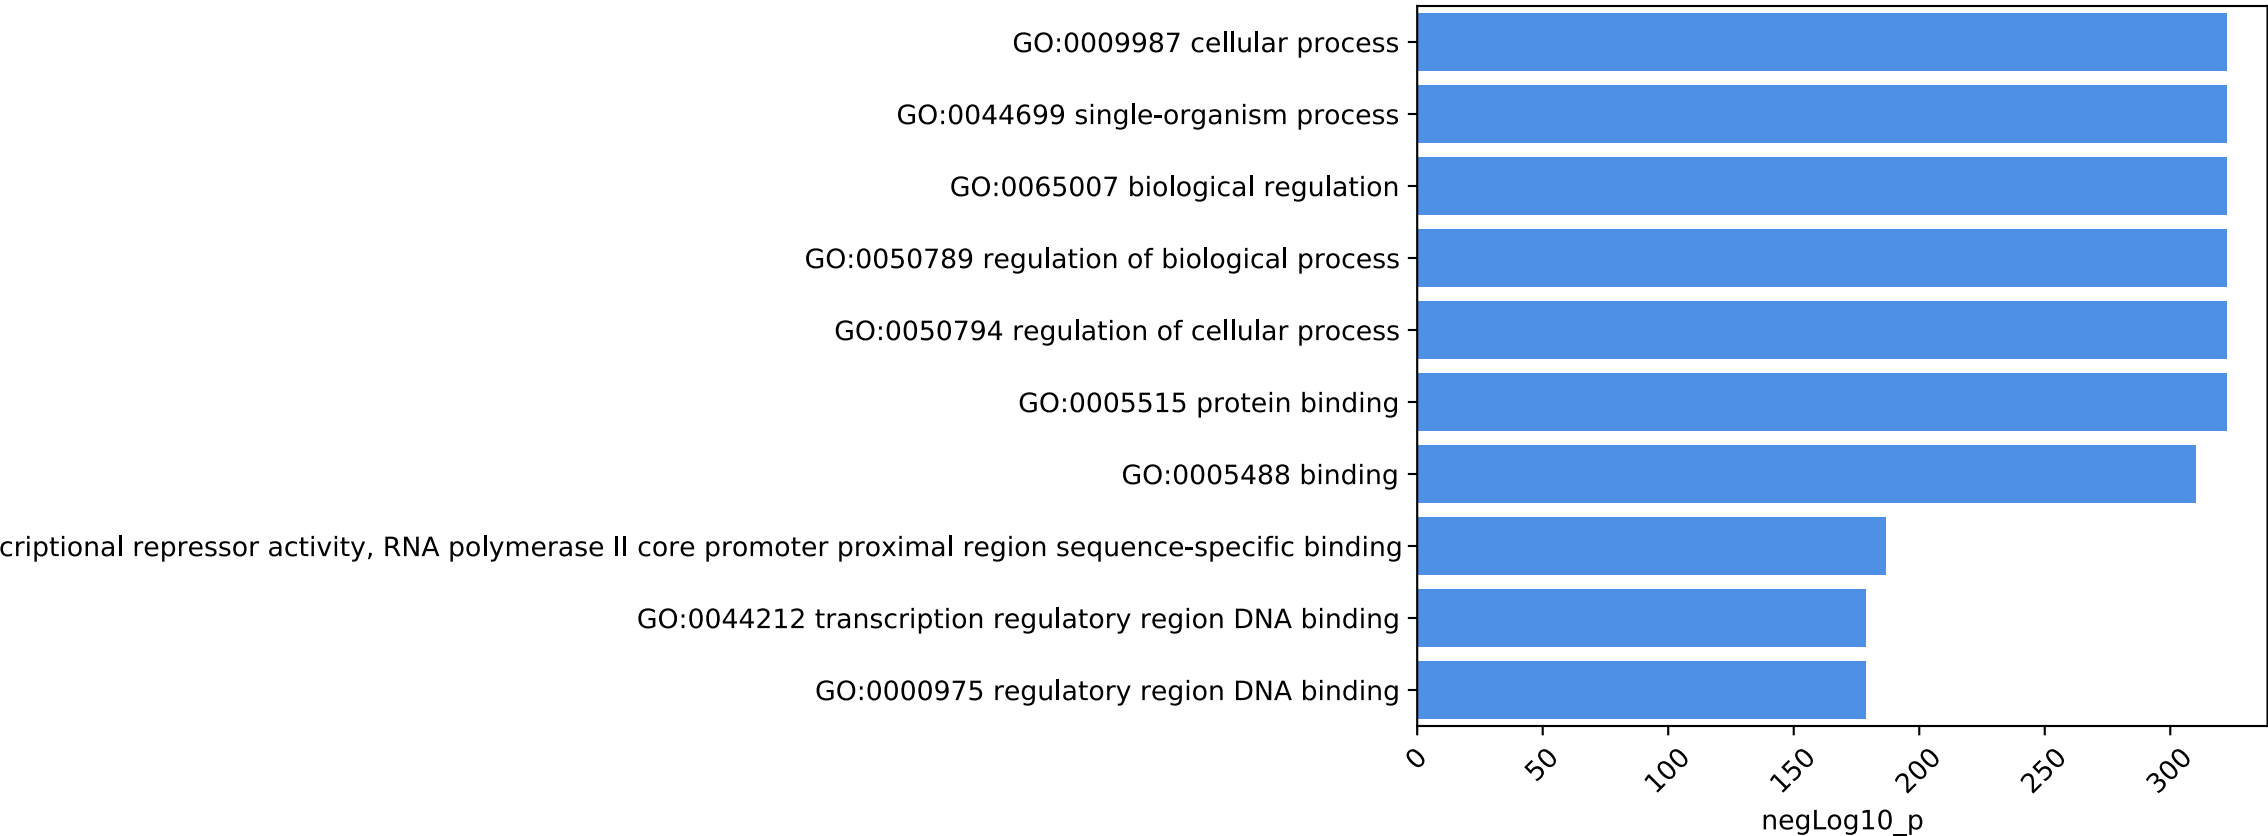



# BivProm1

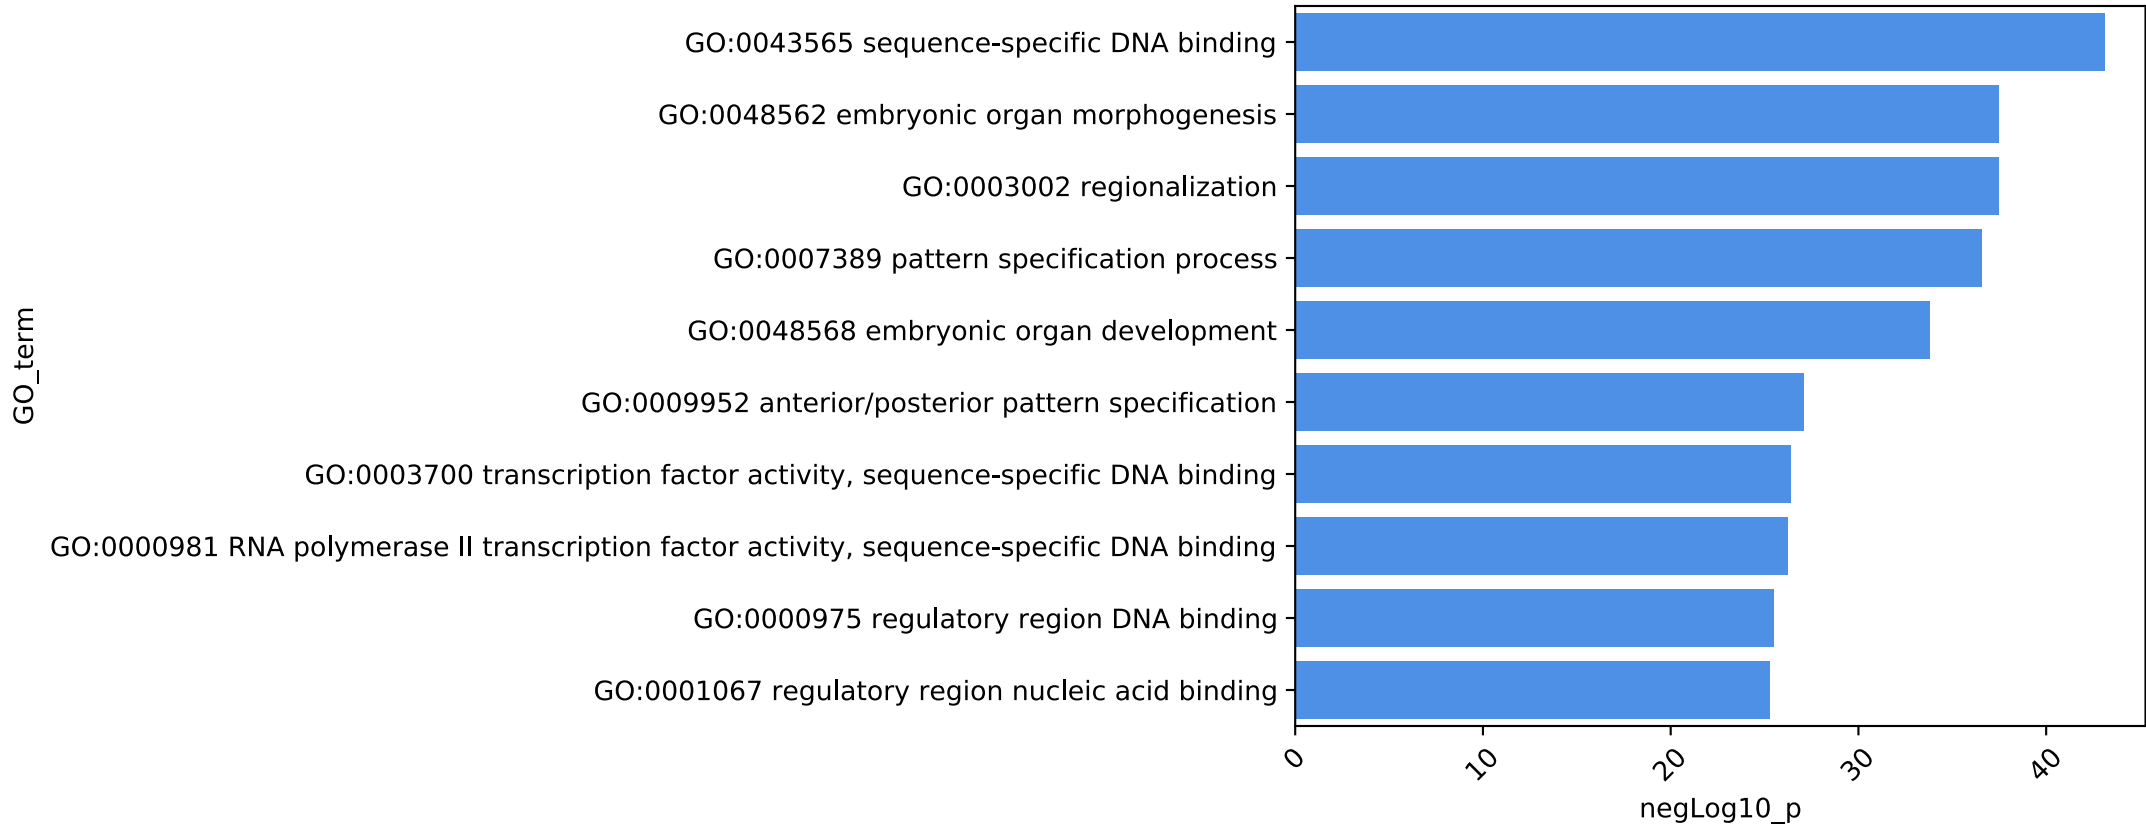

# BivProm2

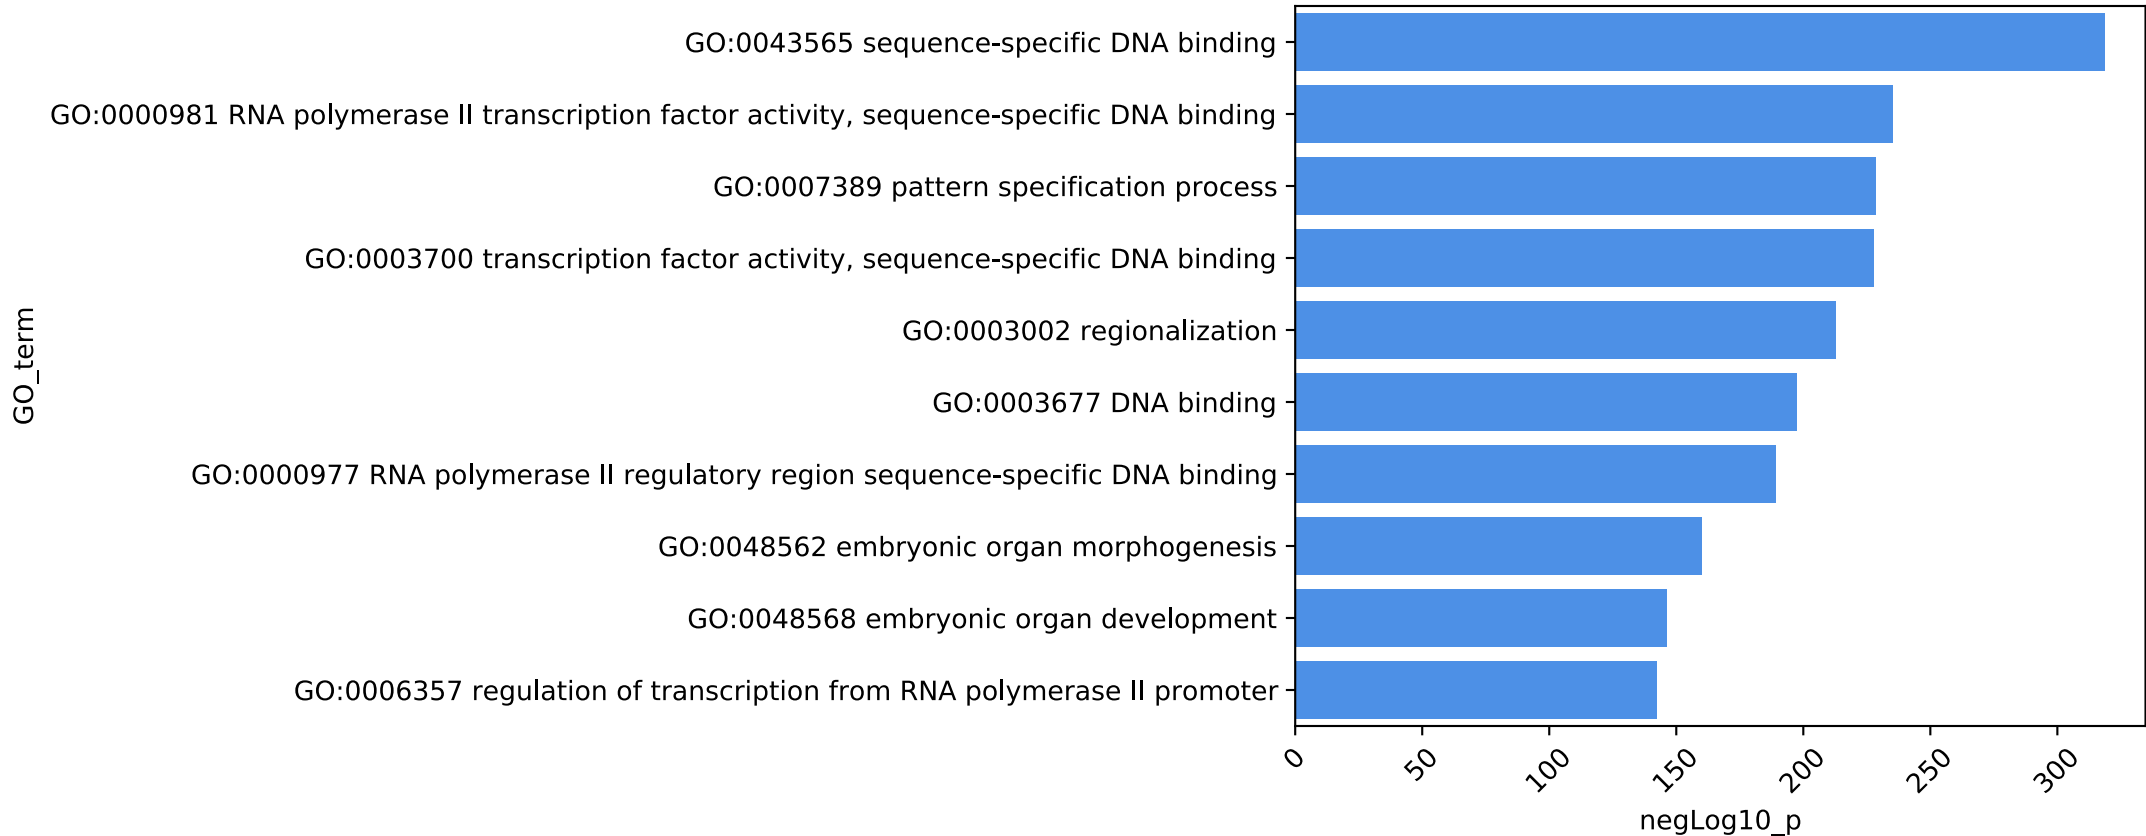

### BivProm3

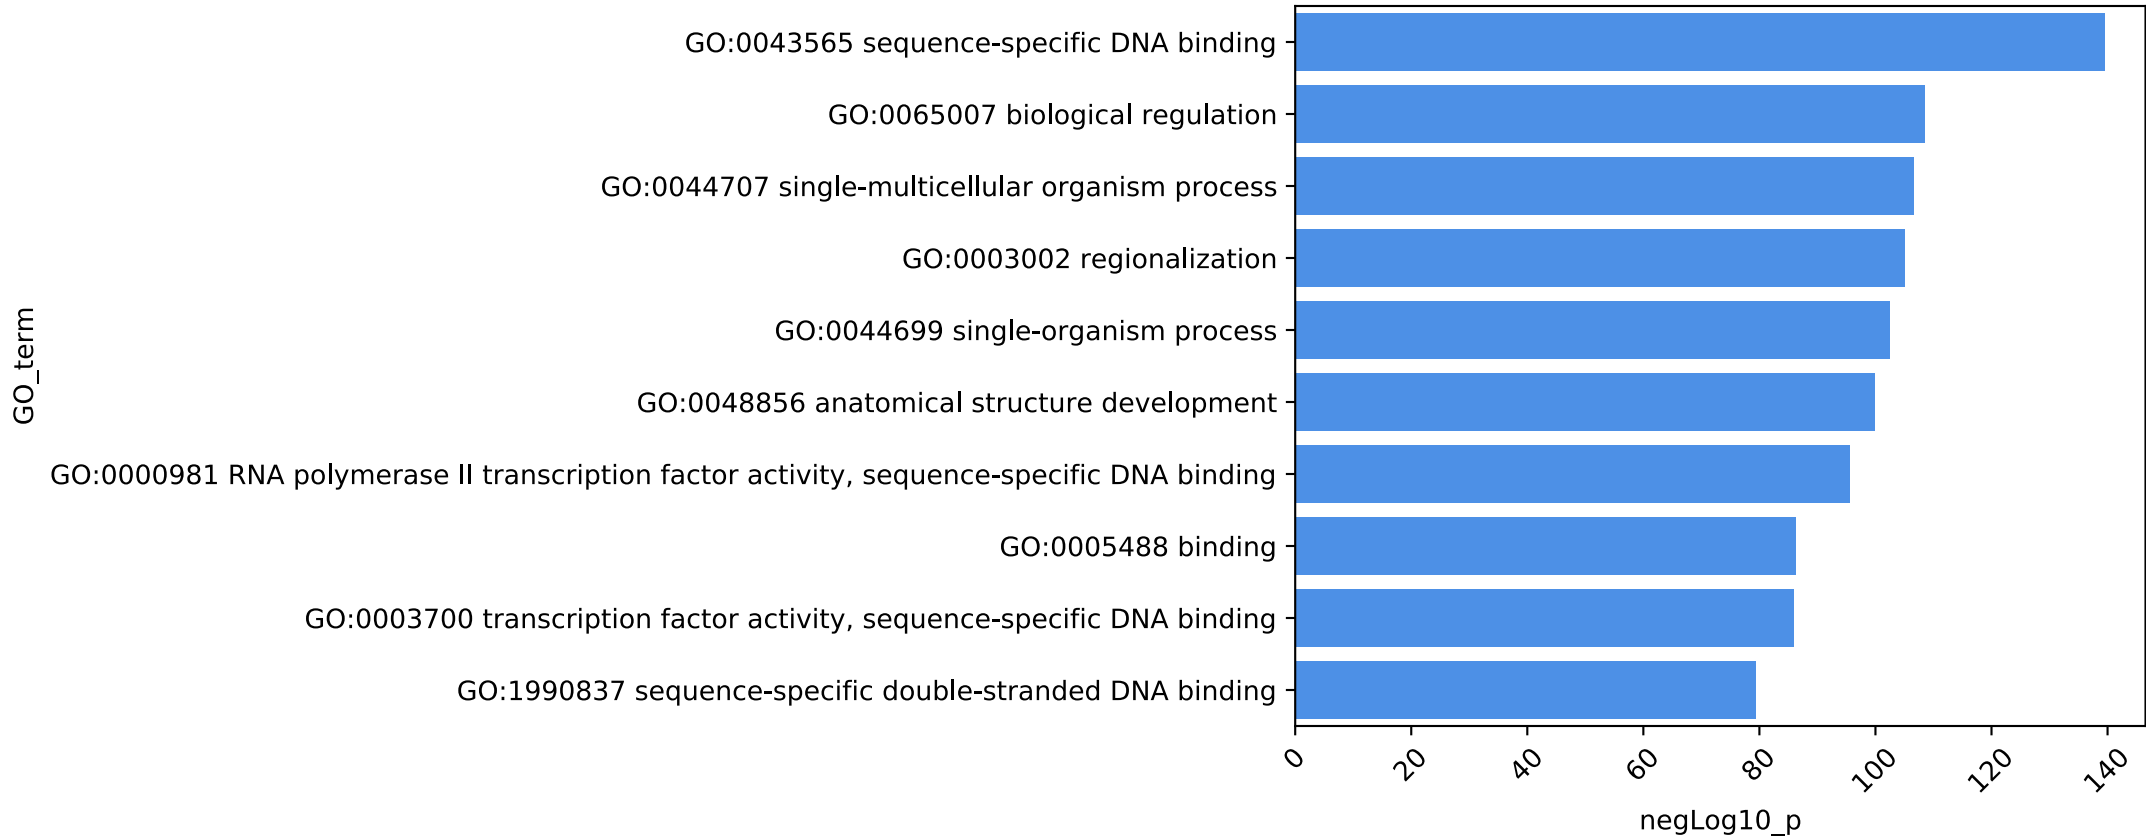

# BivProm4

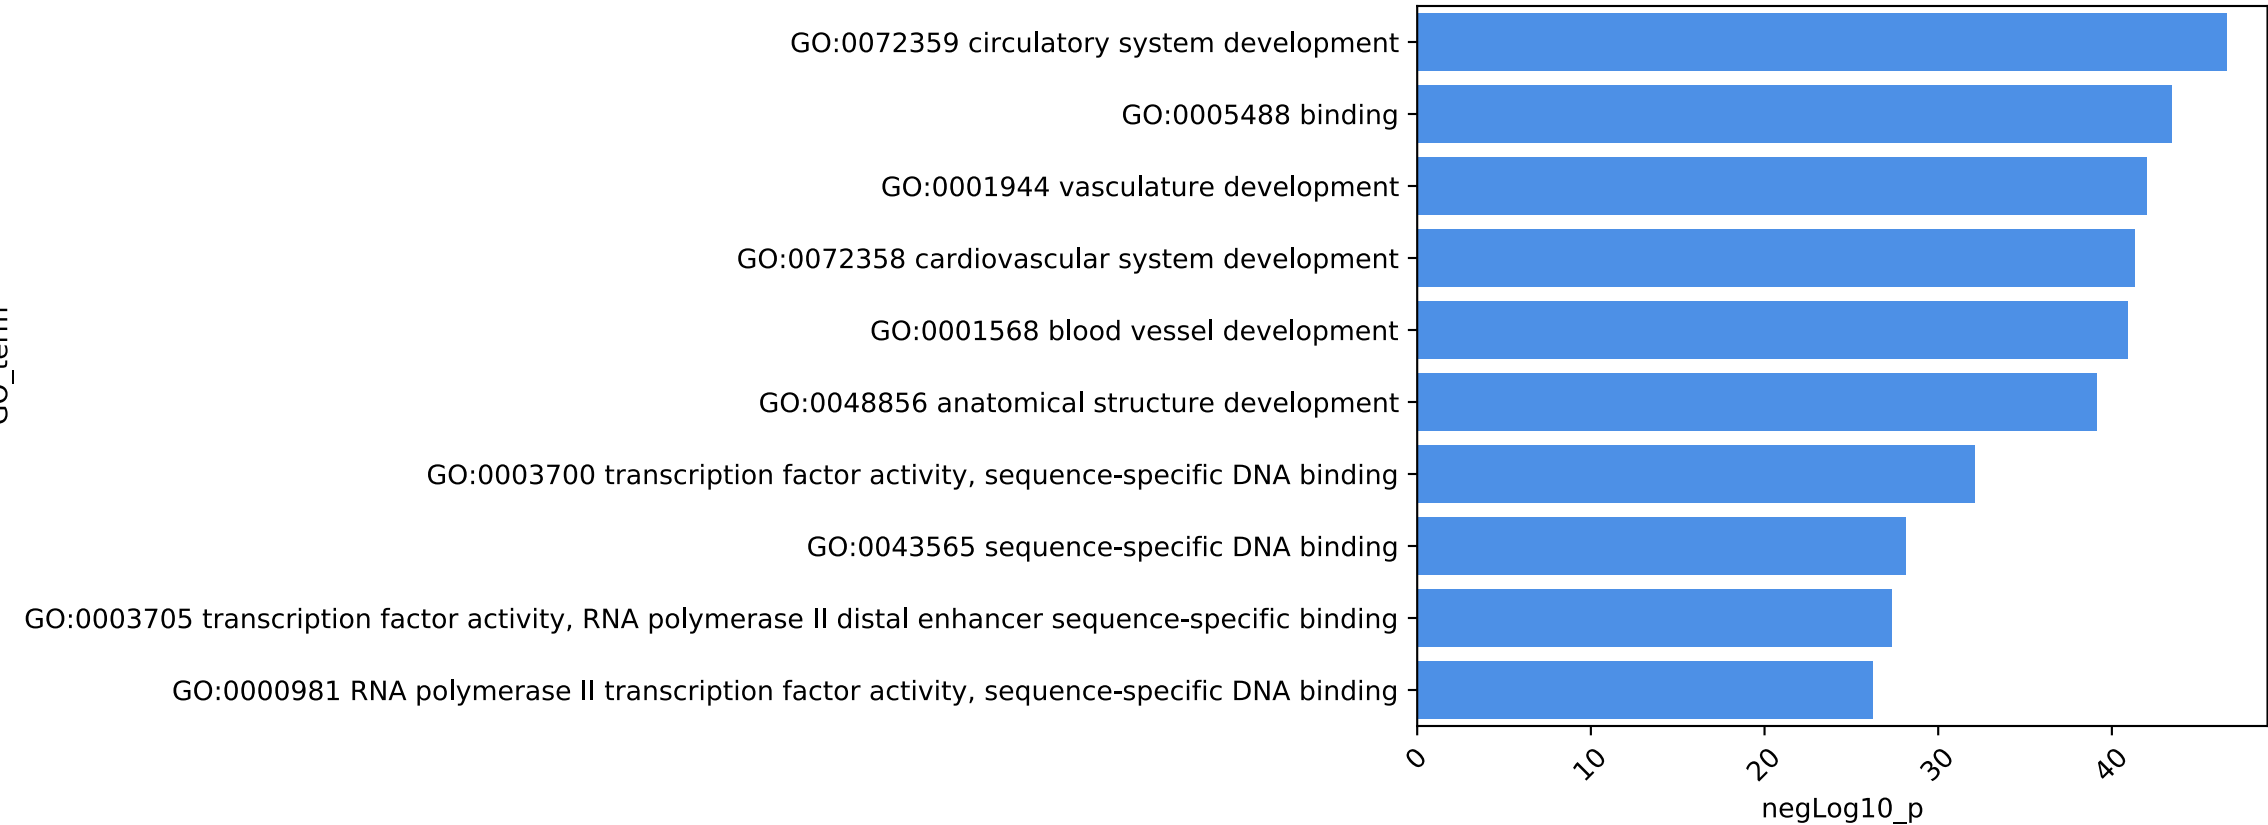

# DNase1

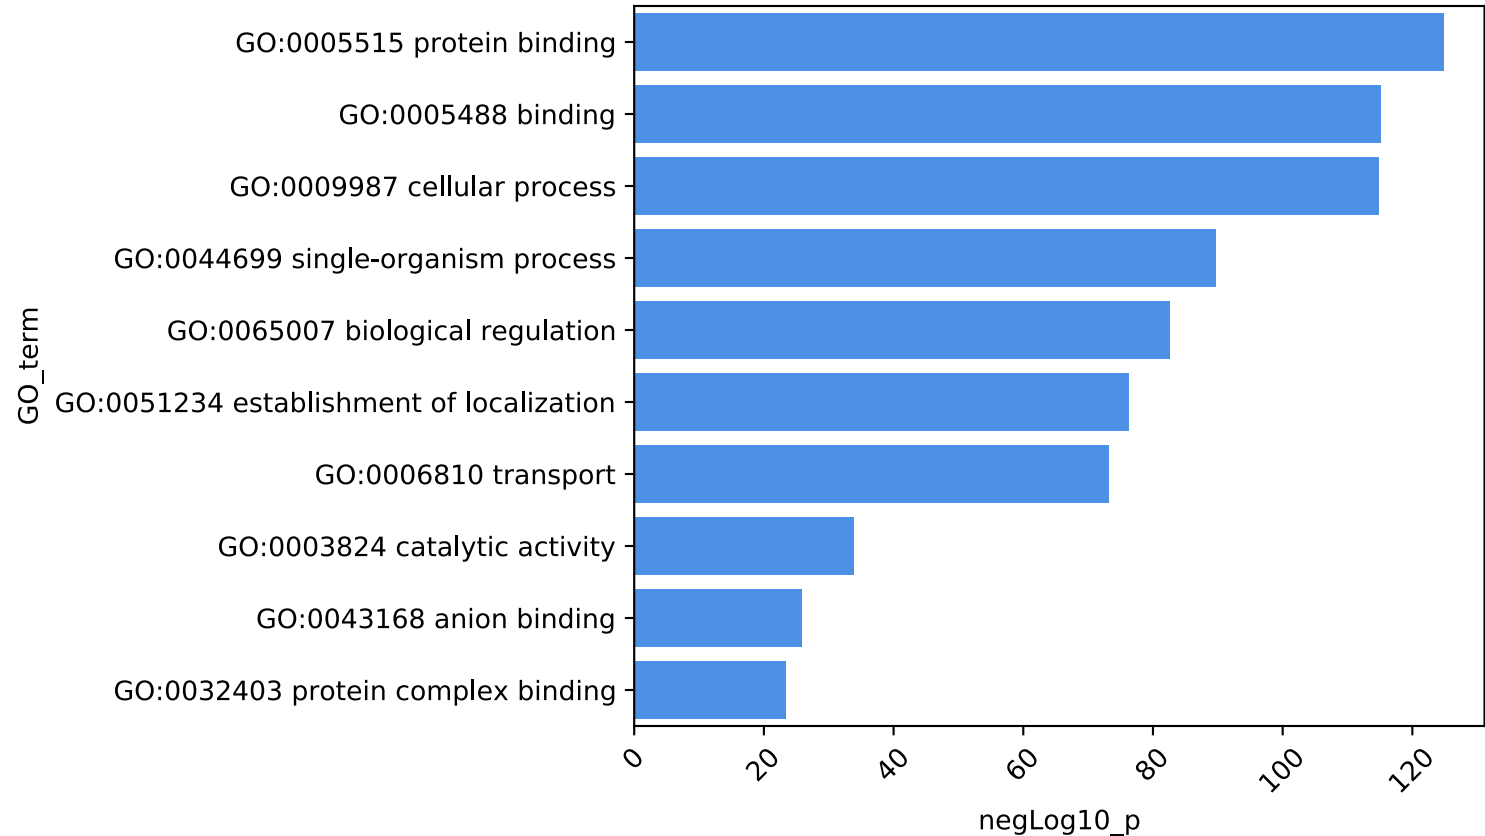

# EnhA1

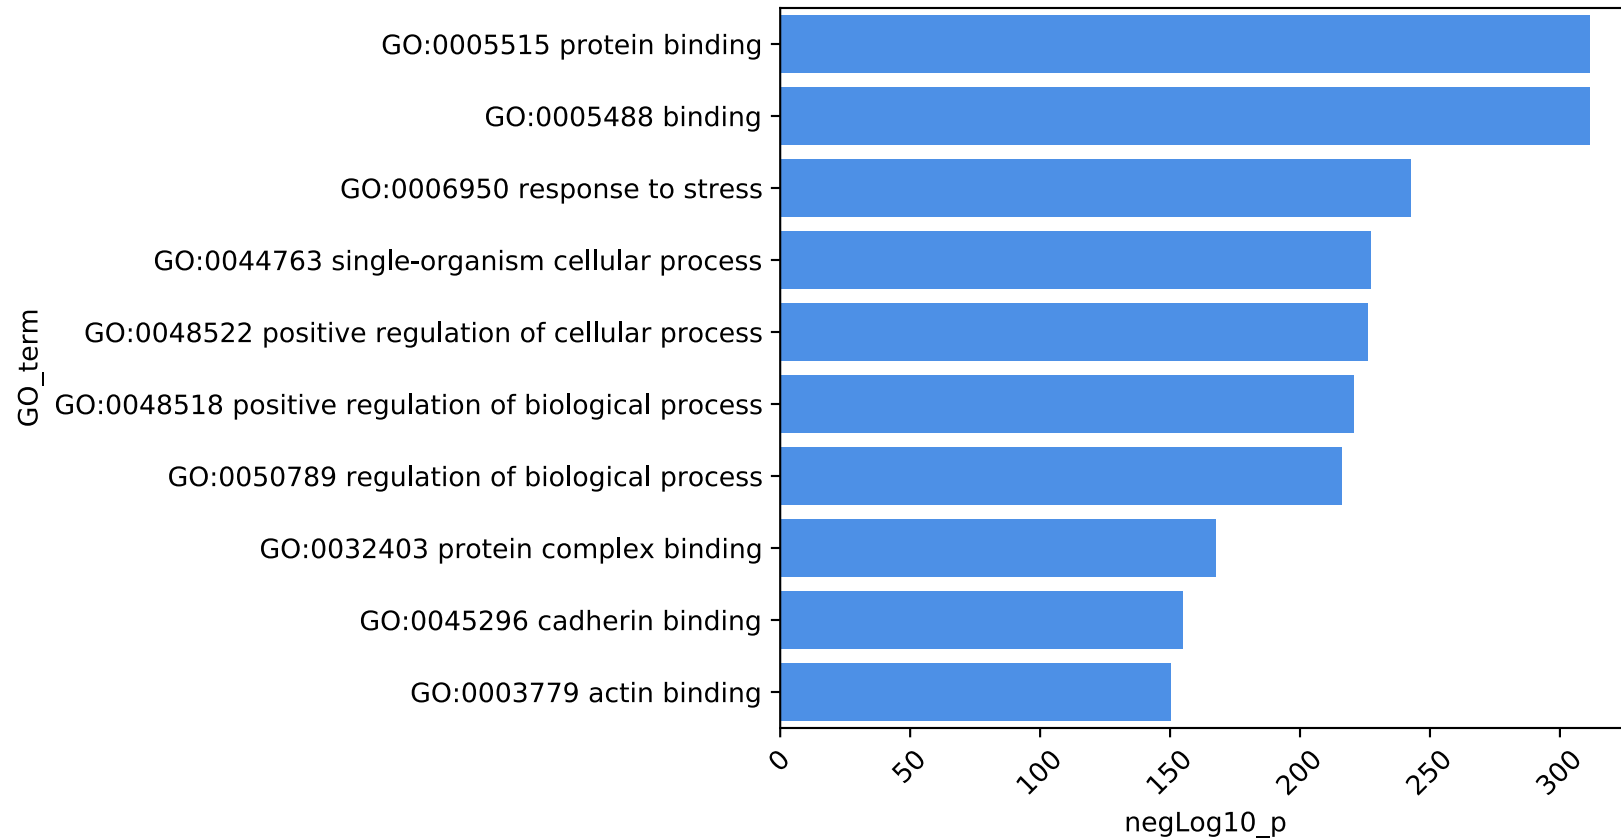

## EnhA2

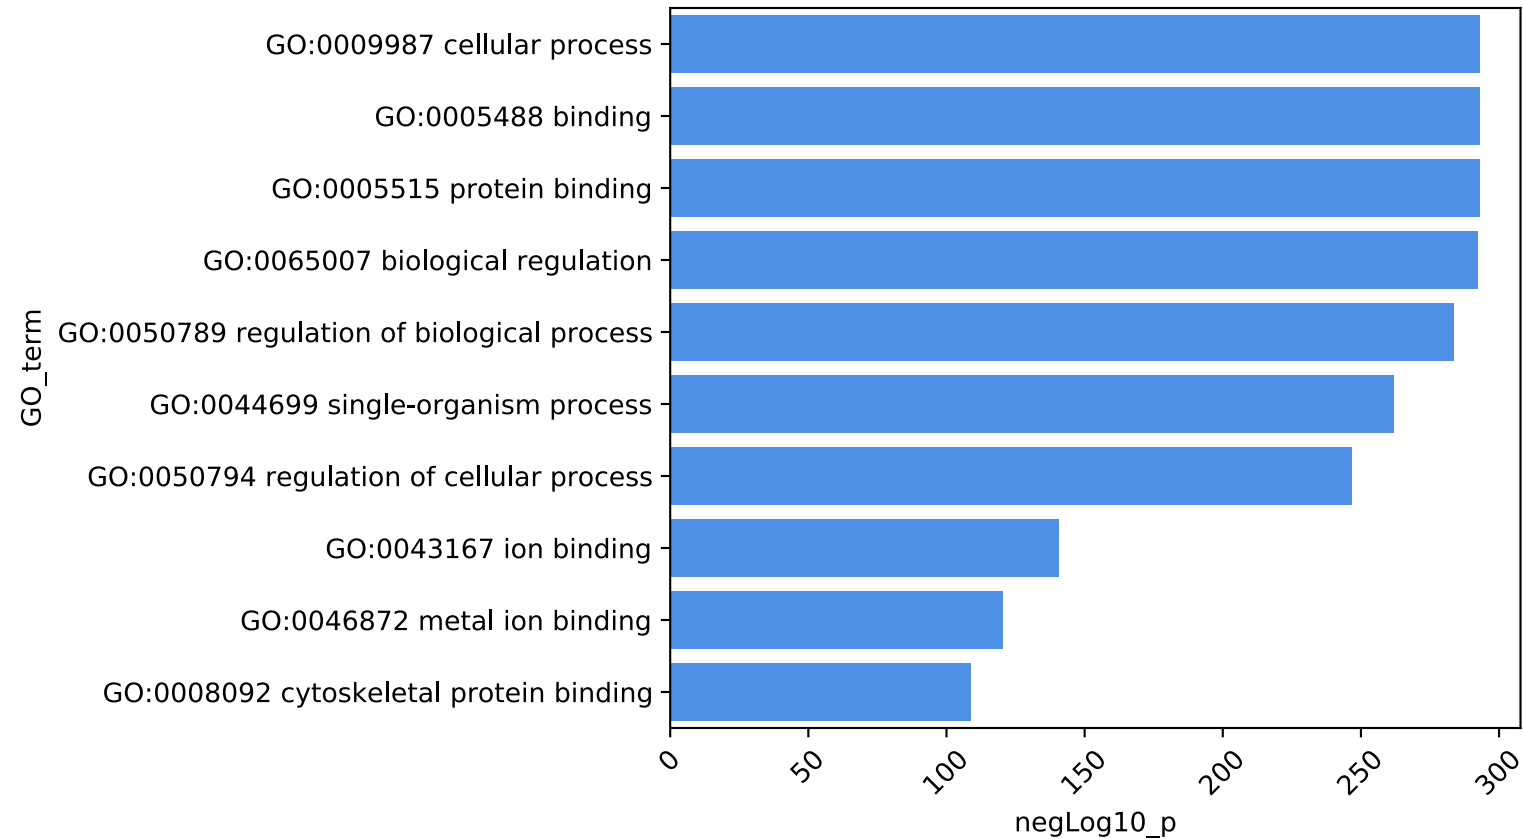

# EnhA3

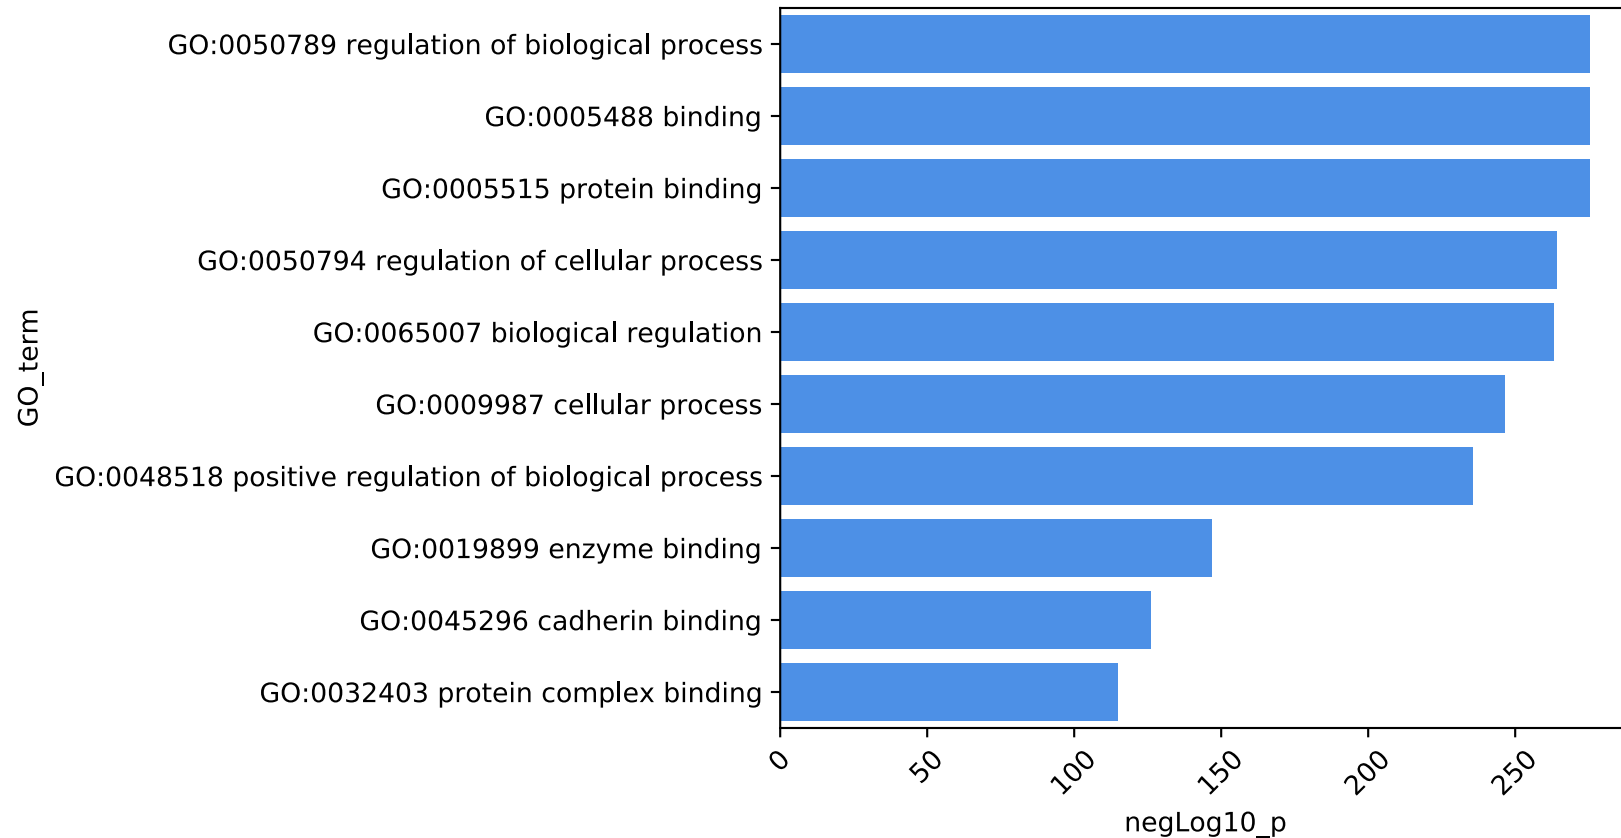



# EnhA4

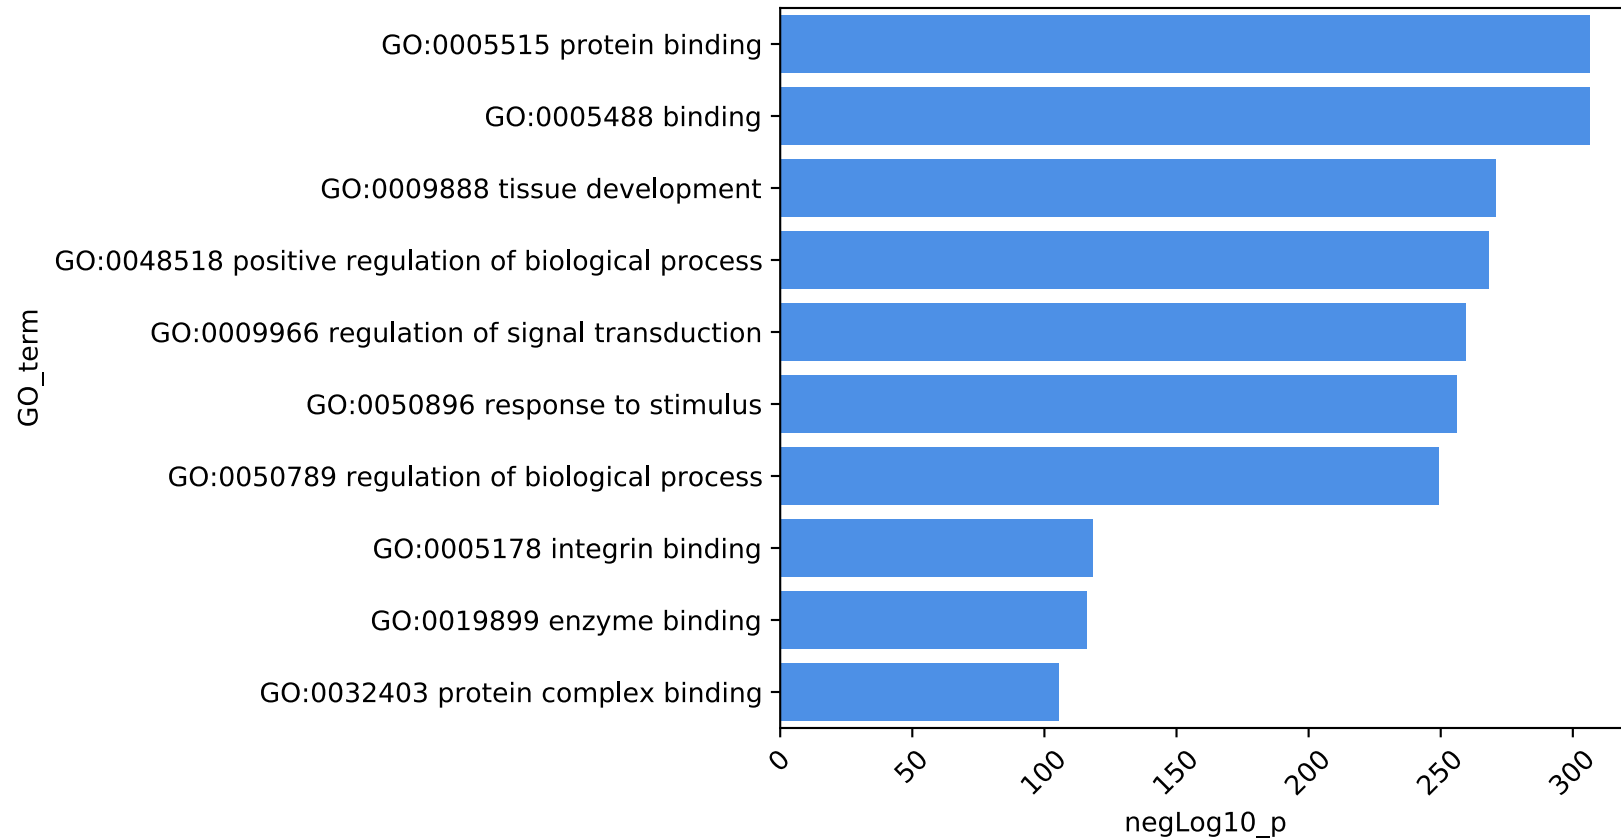

# EnhA5

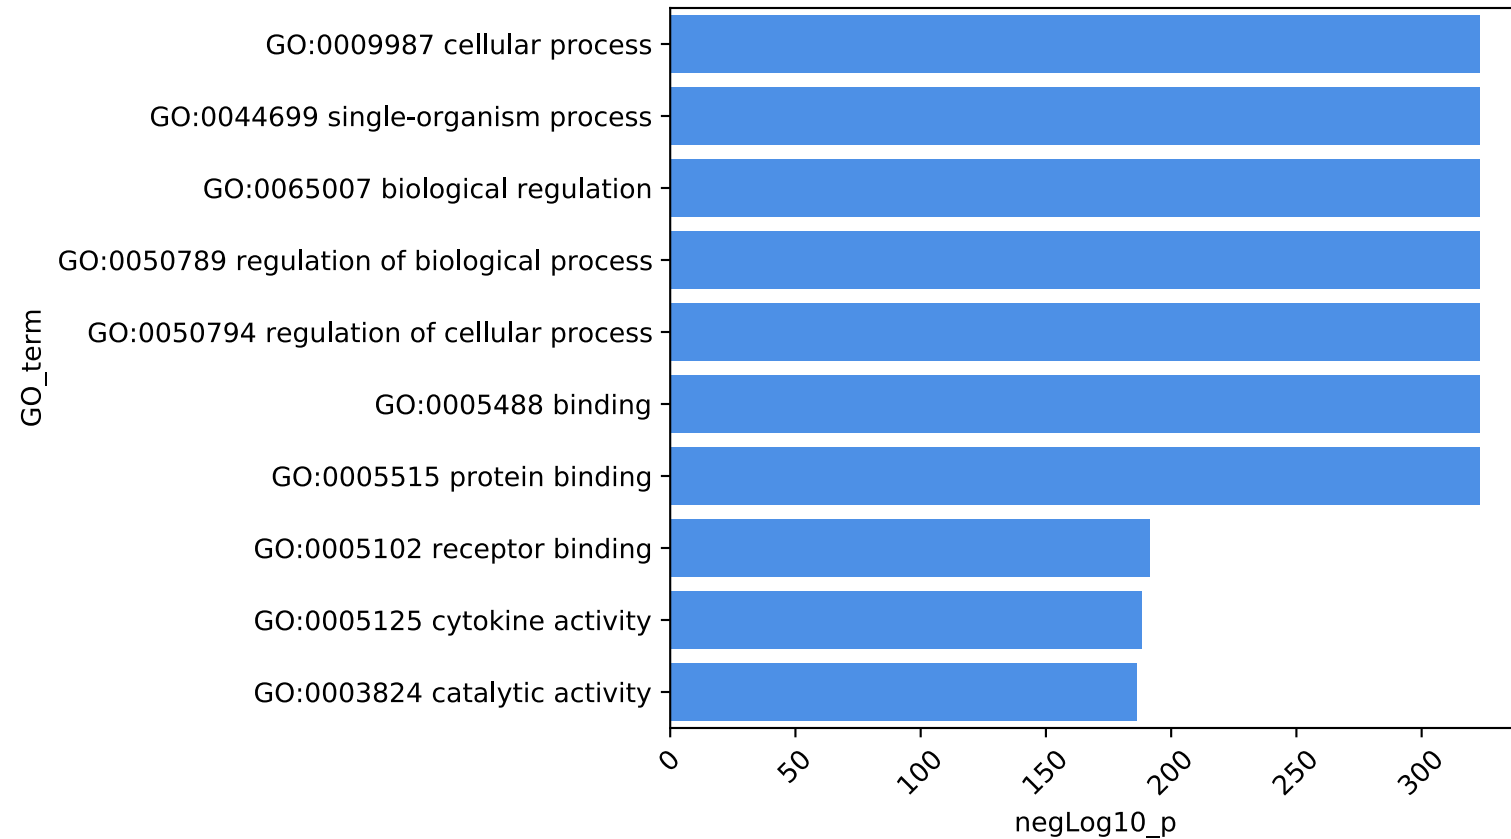

# EnhA6

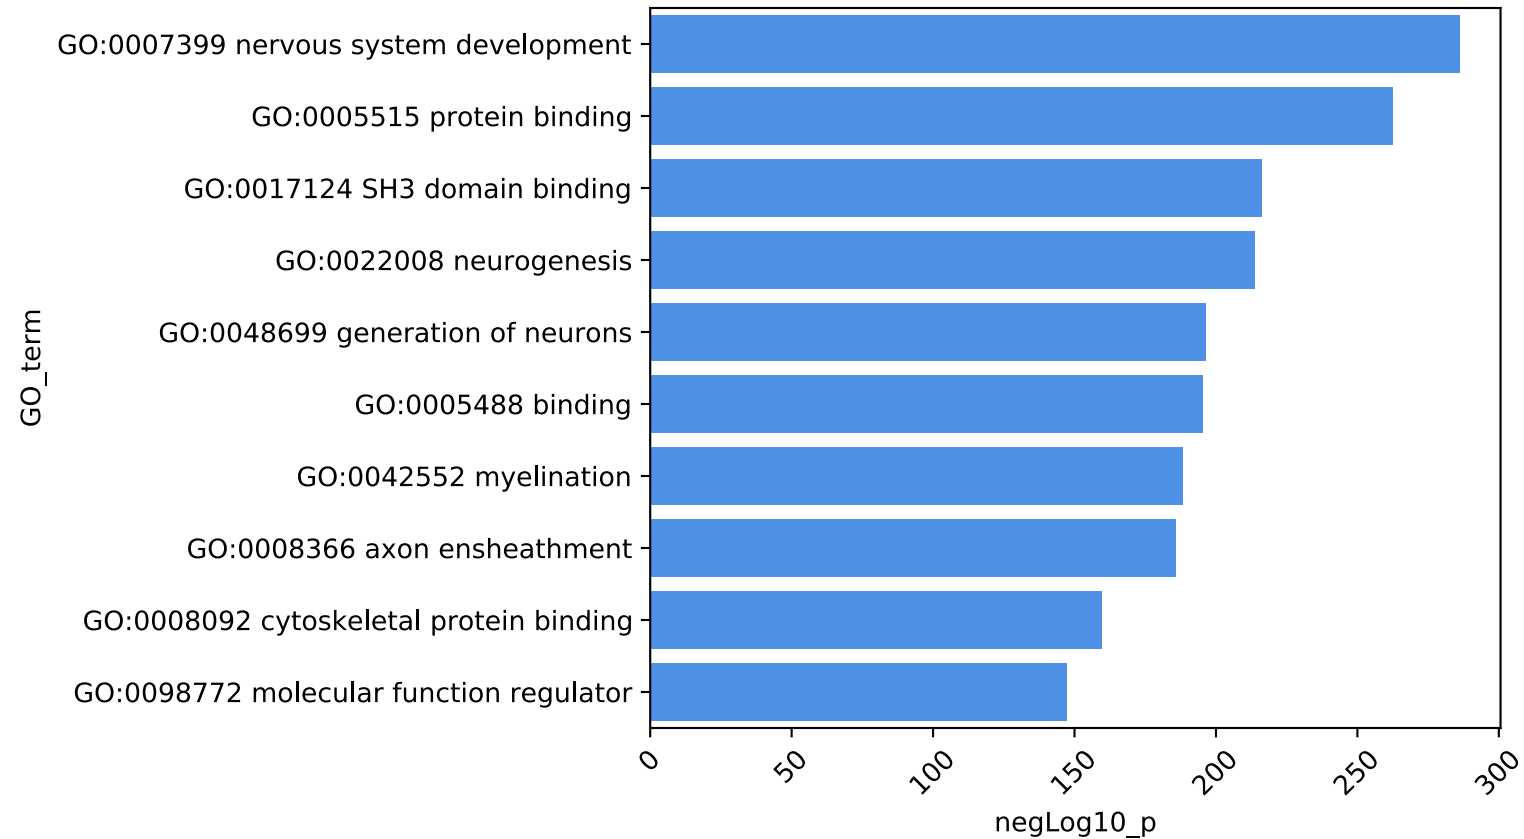

# EnhA7

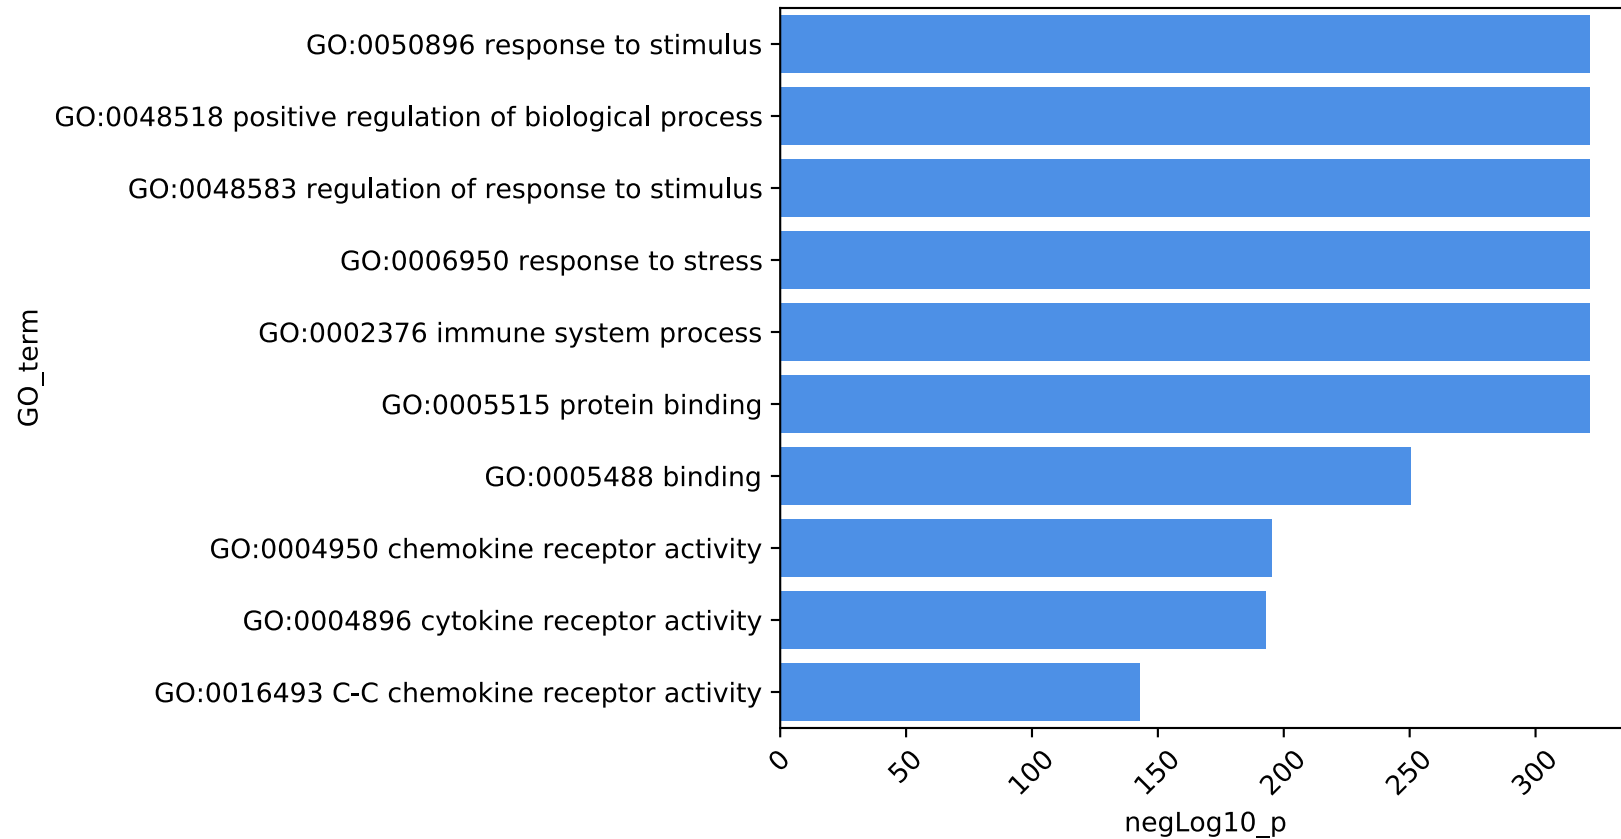

## EnhA8

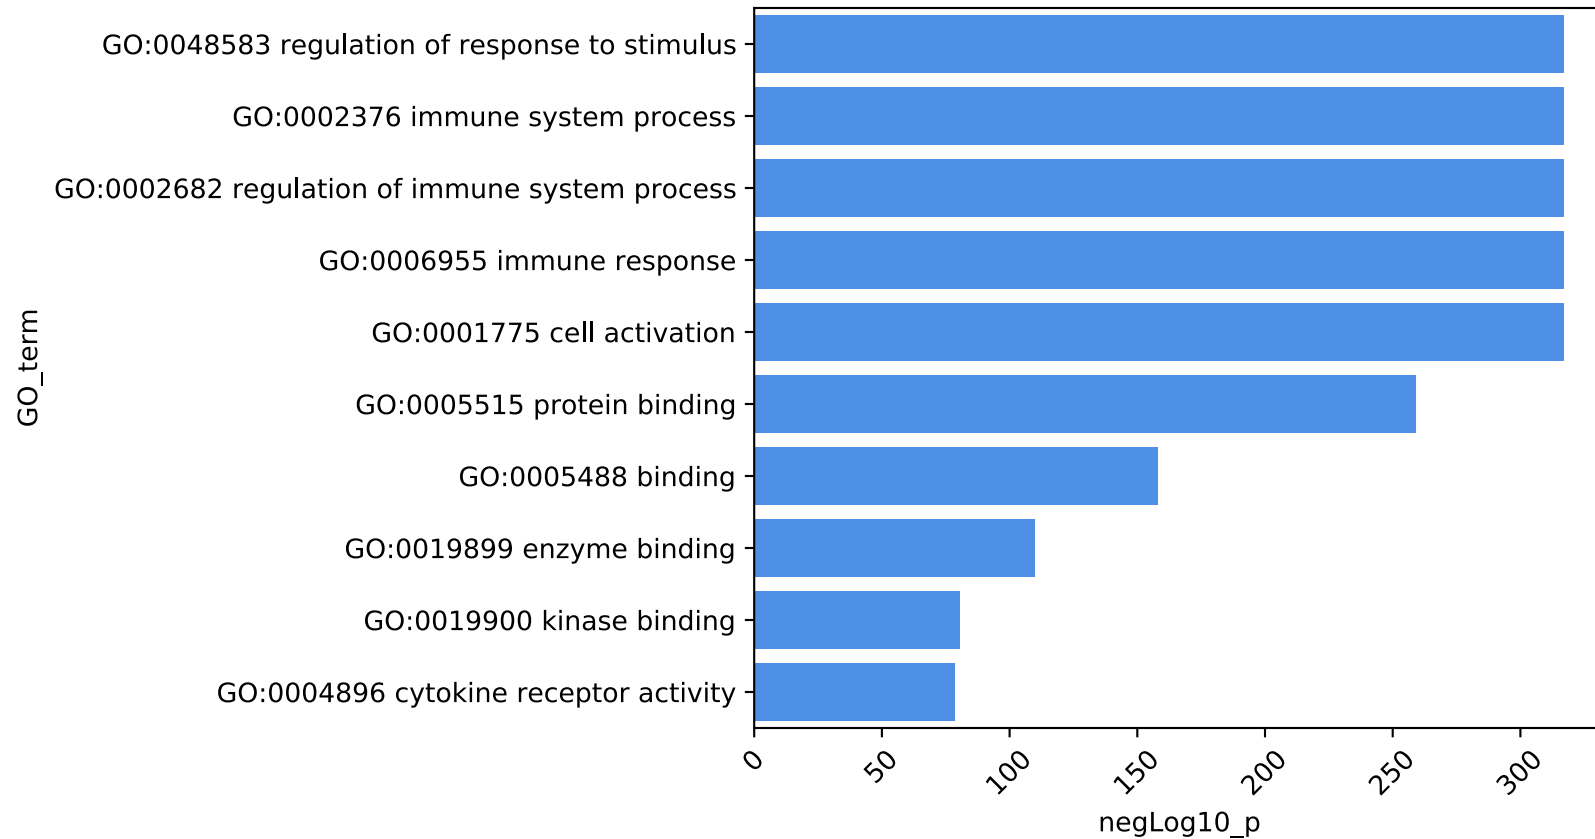

## EnhA9

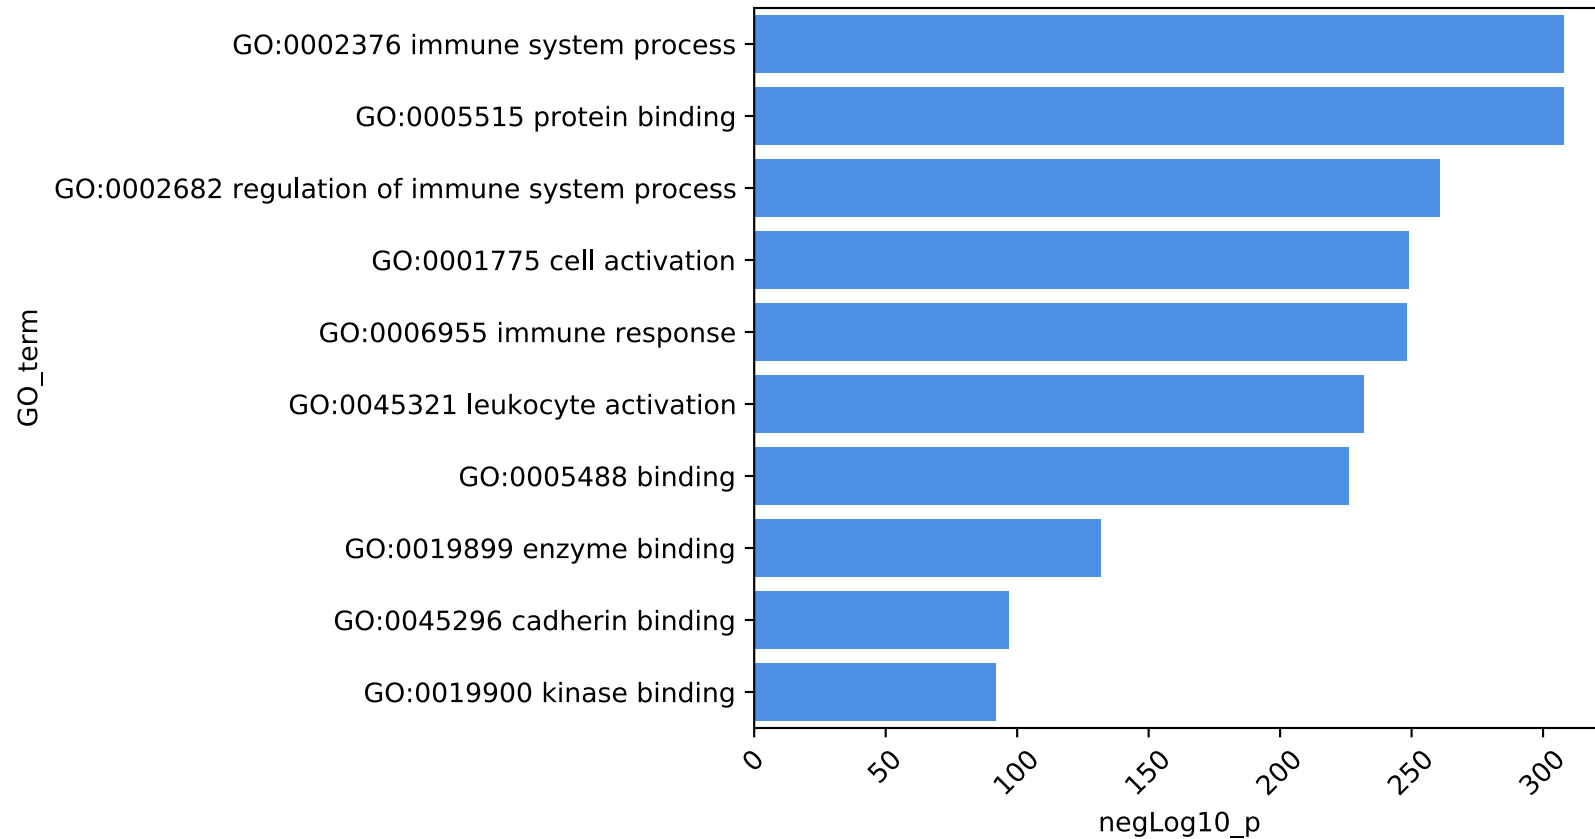

# EnhA10

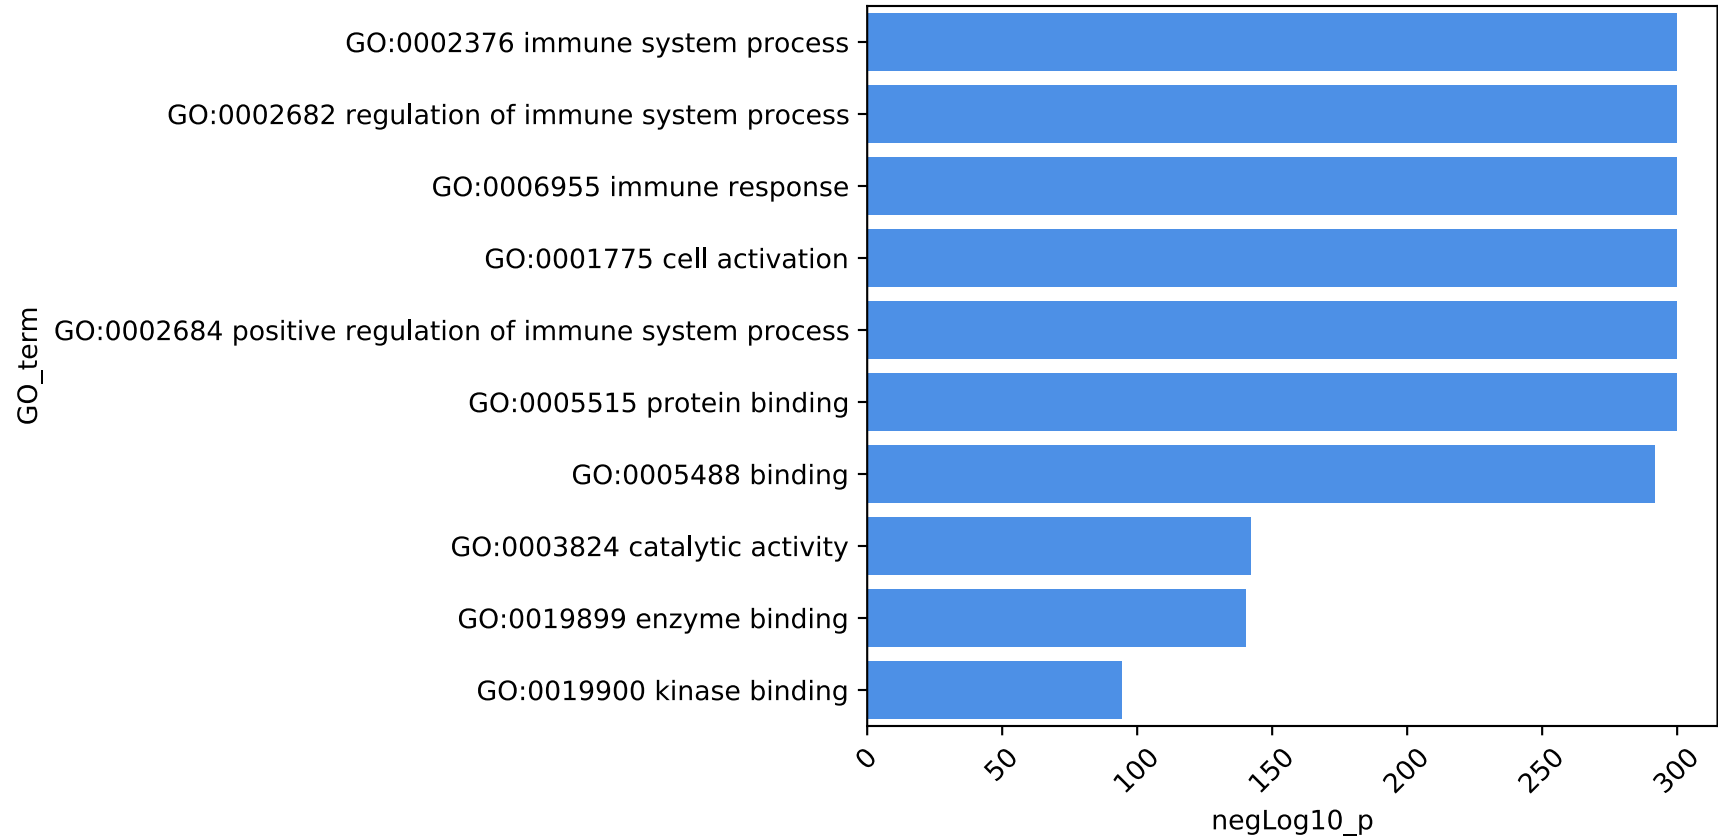

# EnhA11

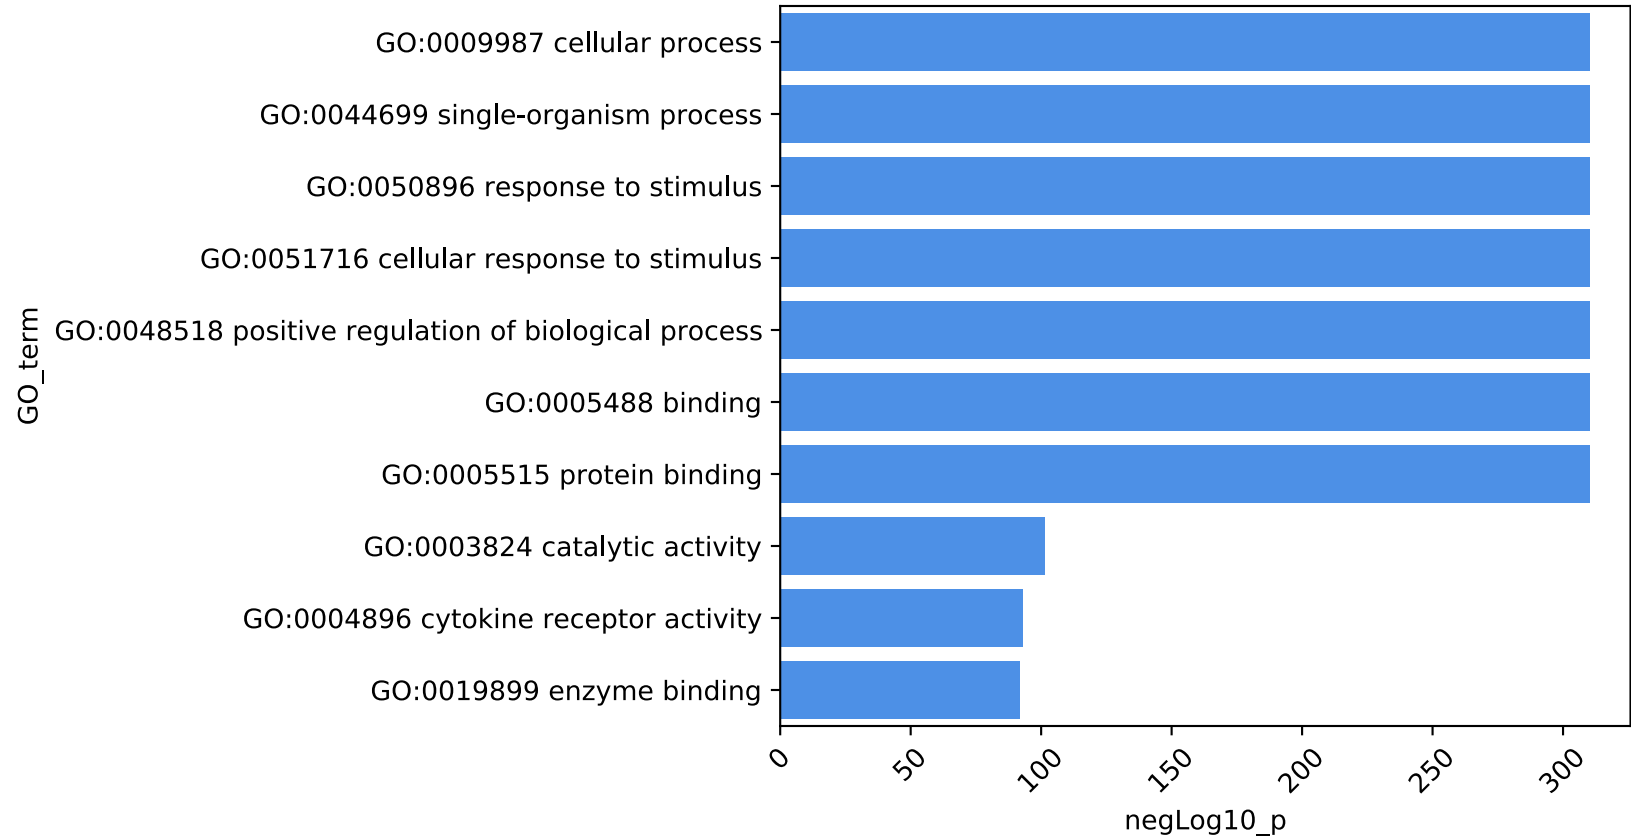



# EnhA12

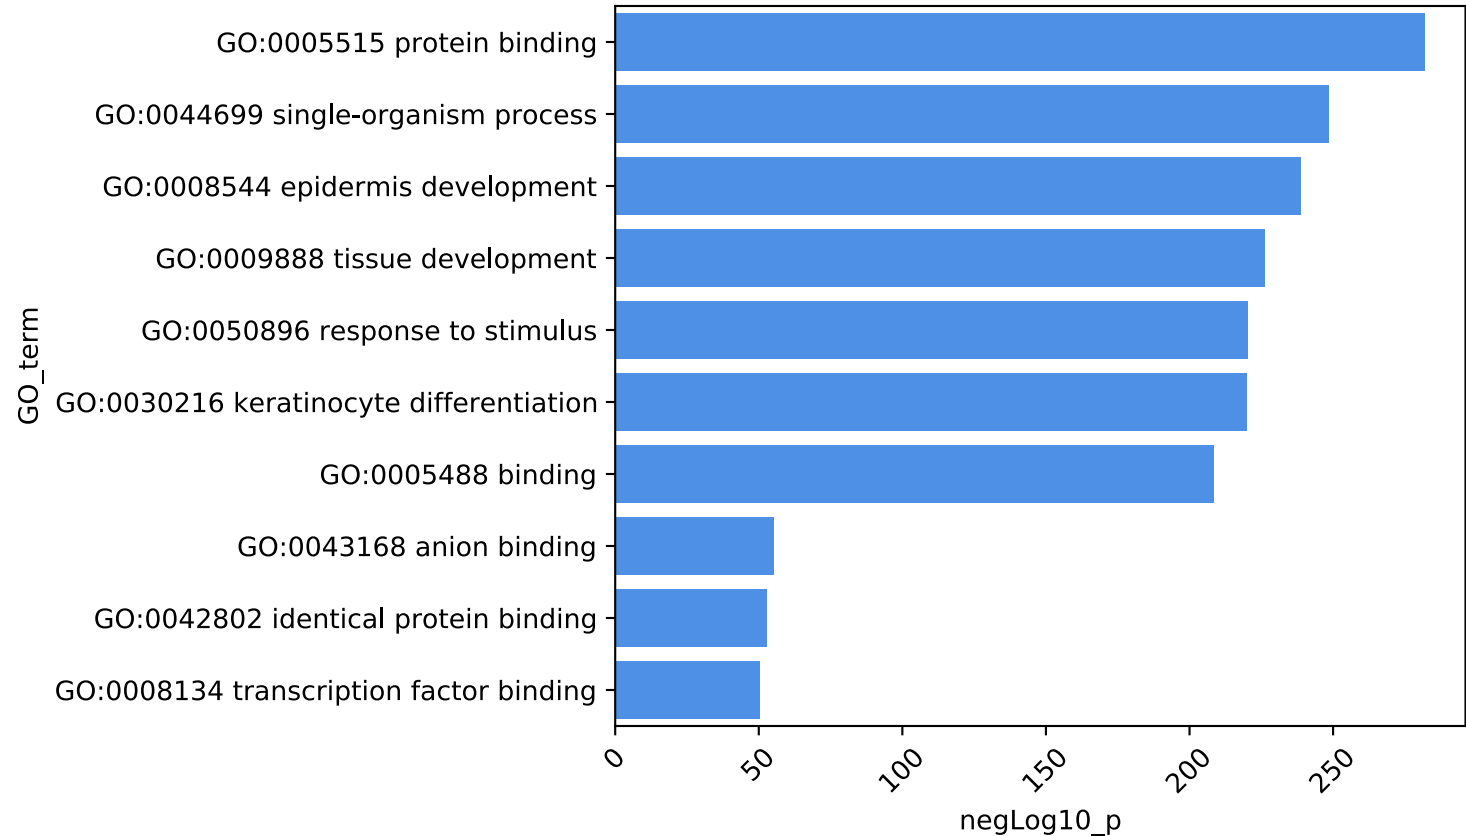

# EnhA13

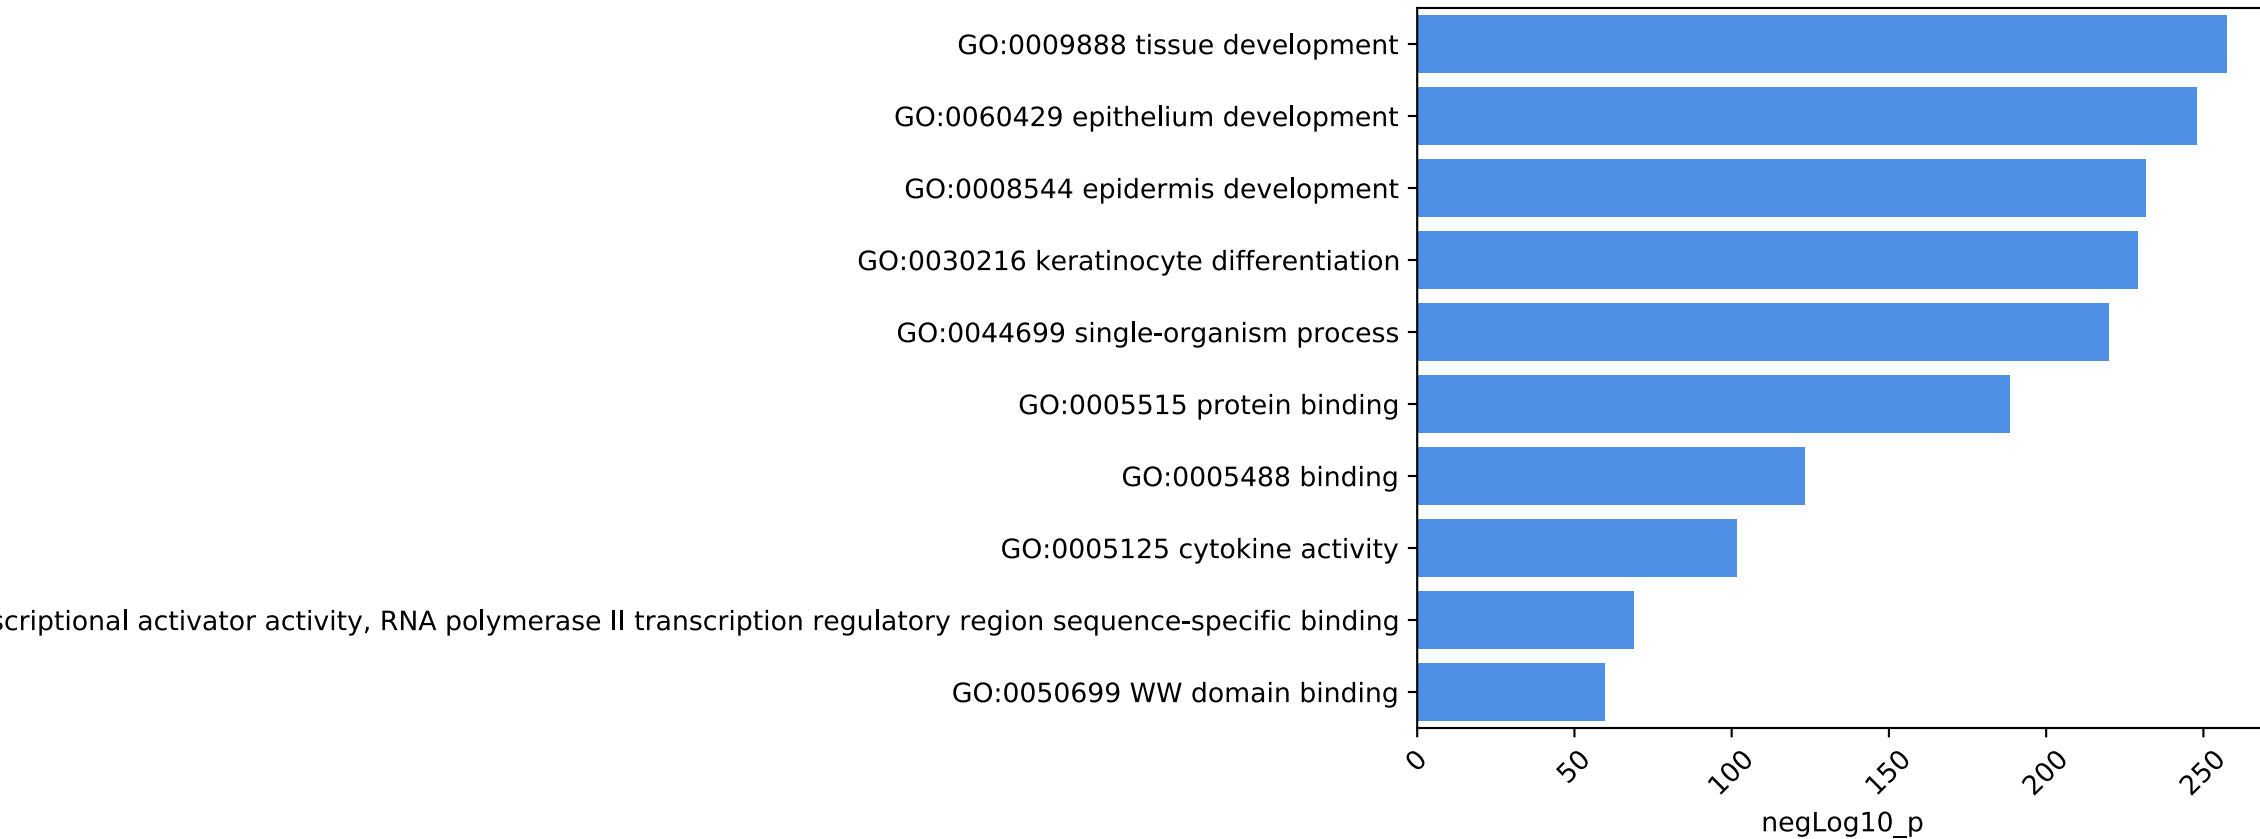

# EnhA14

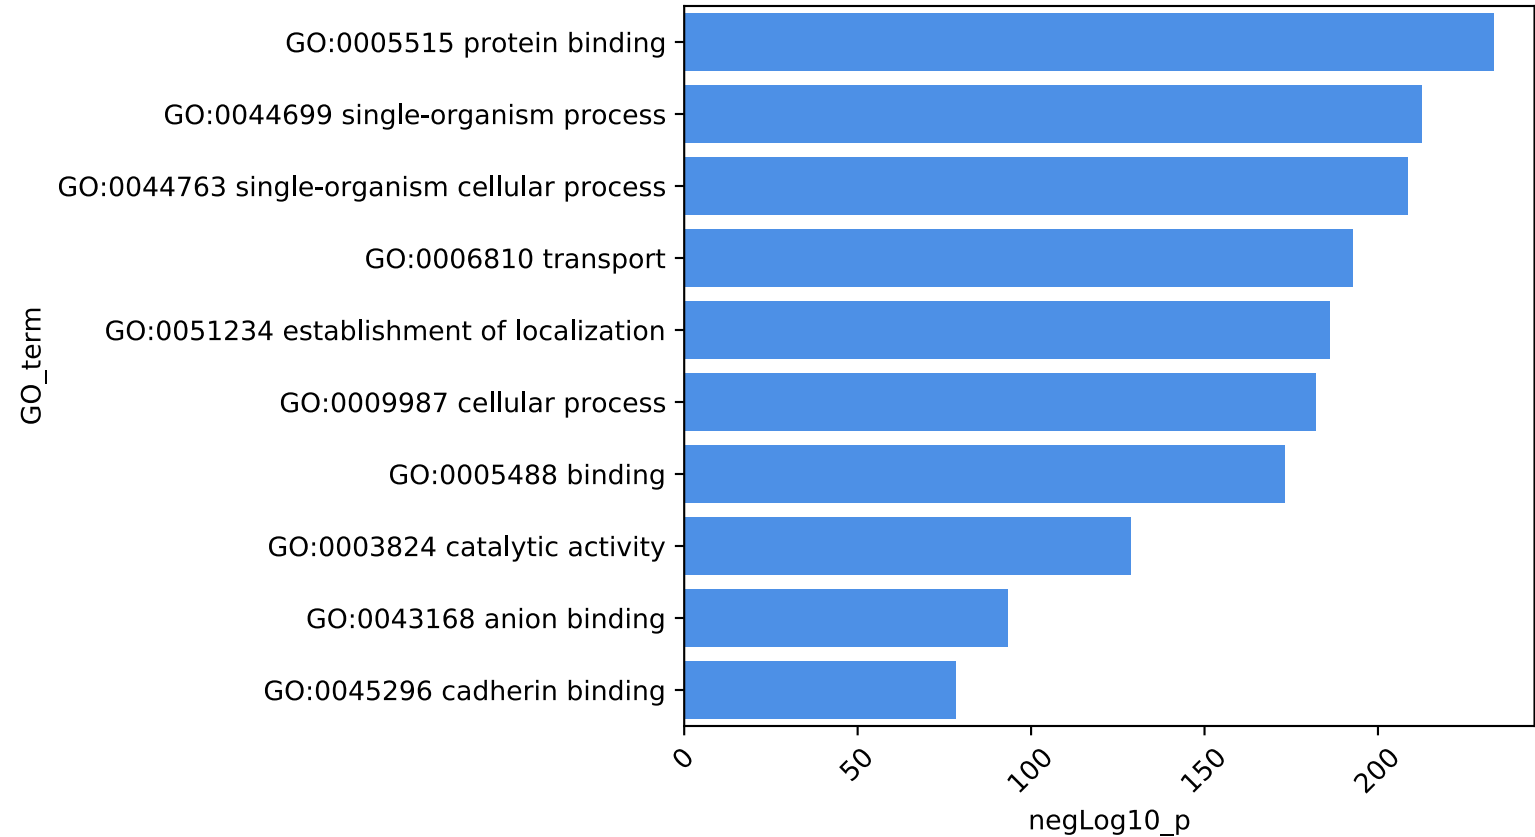

# EnhA15

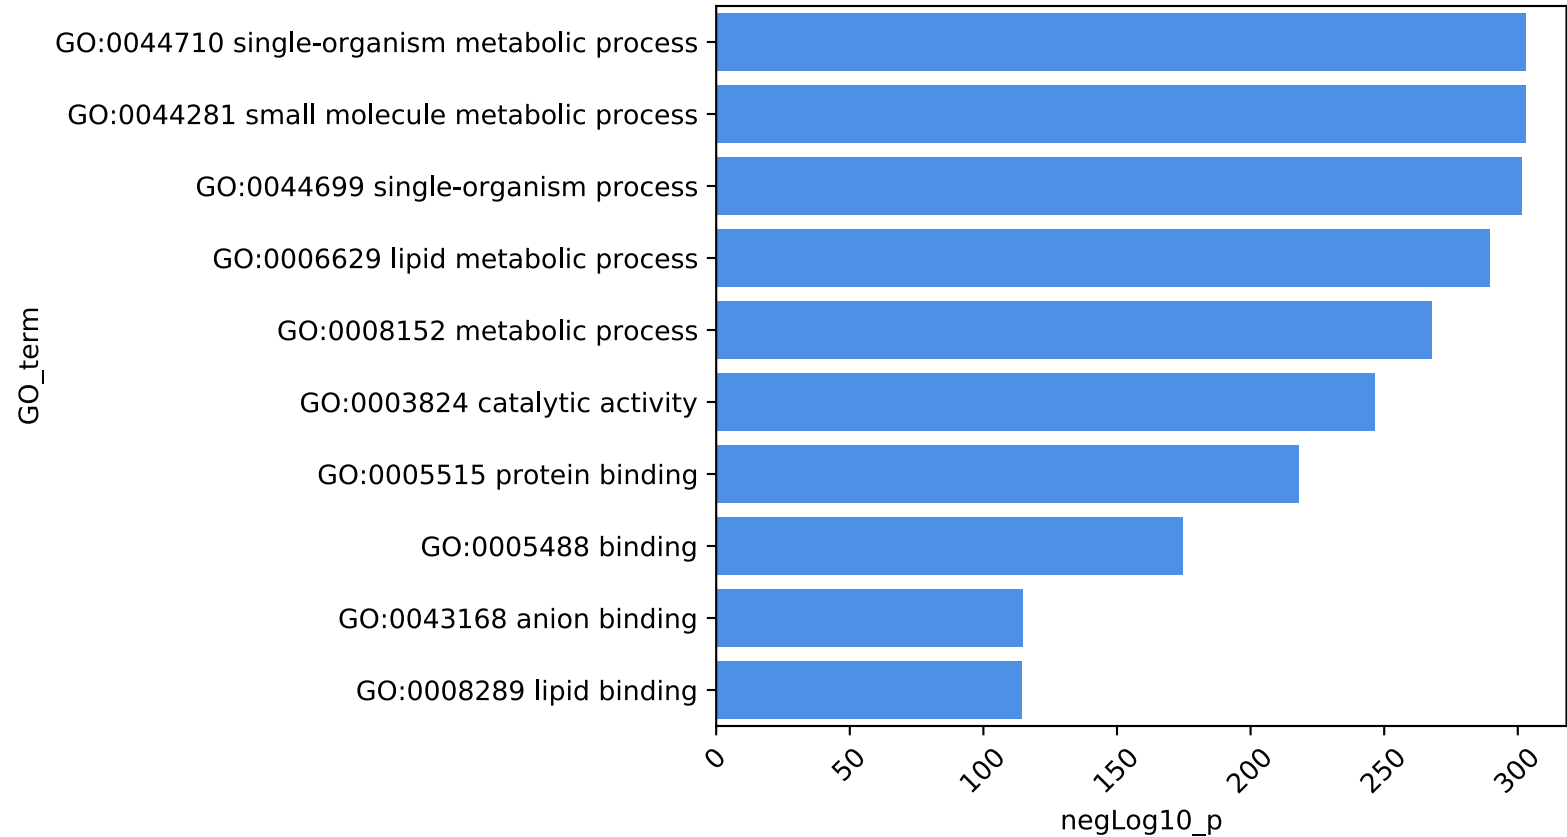

# EnhA16

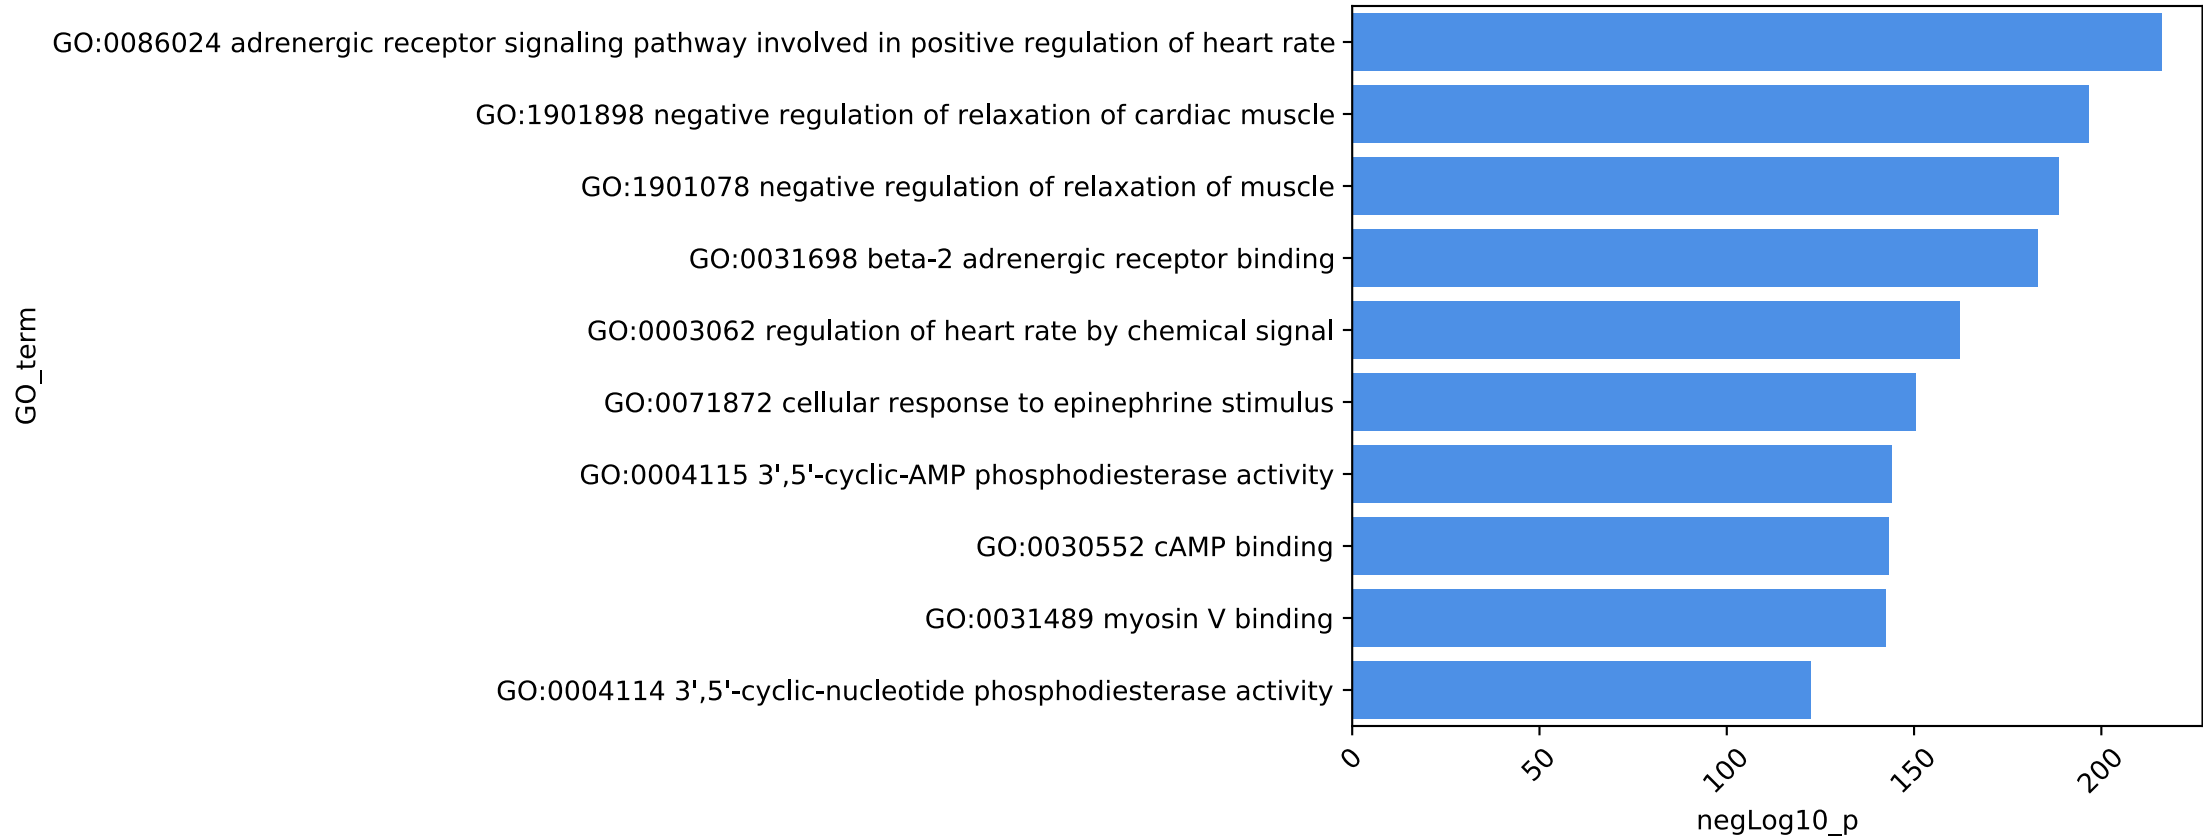

# EnhA17

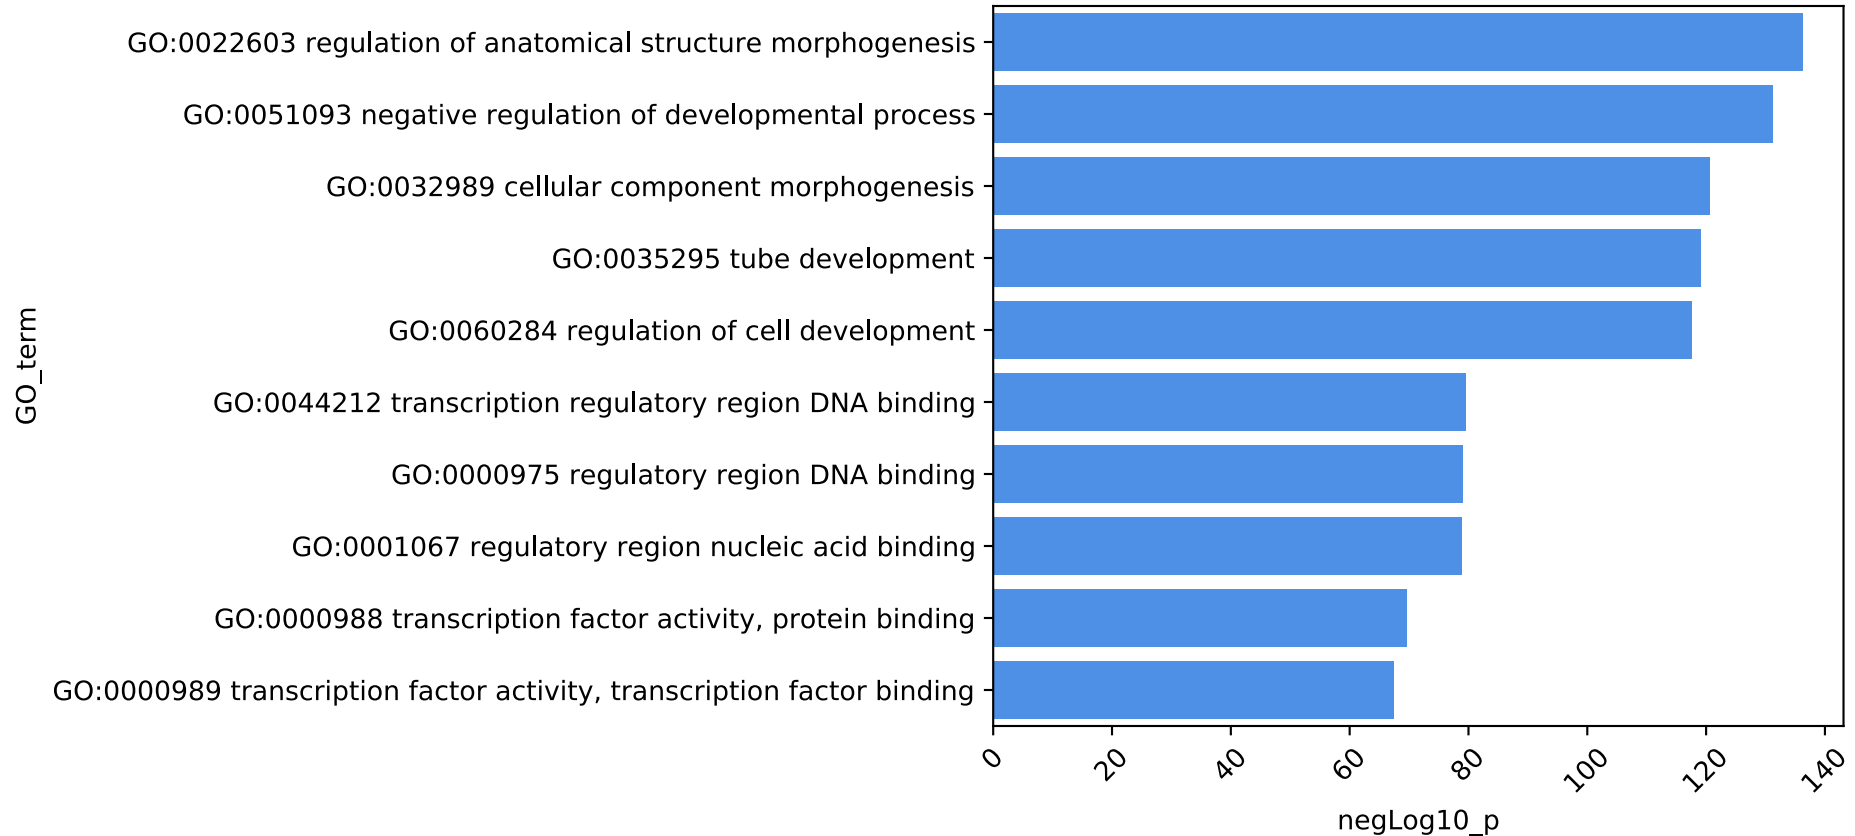

# EnhA18

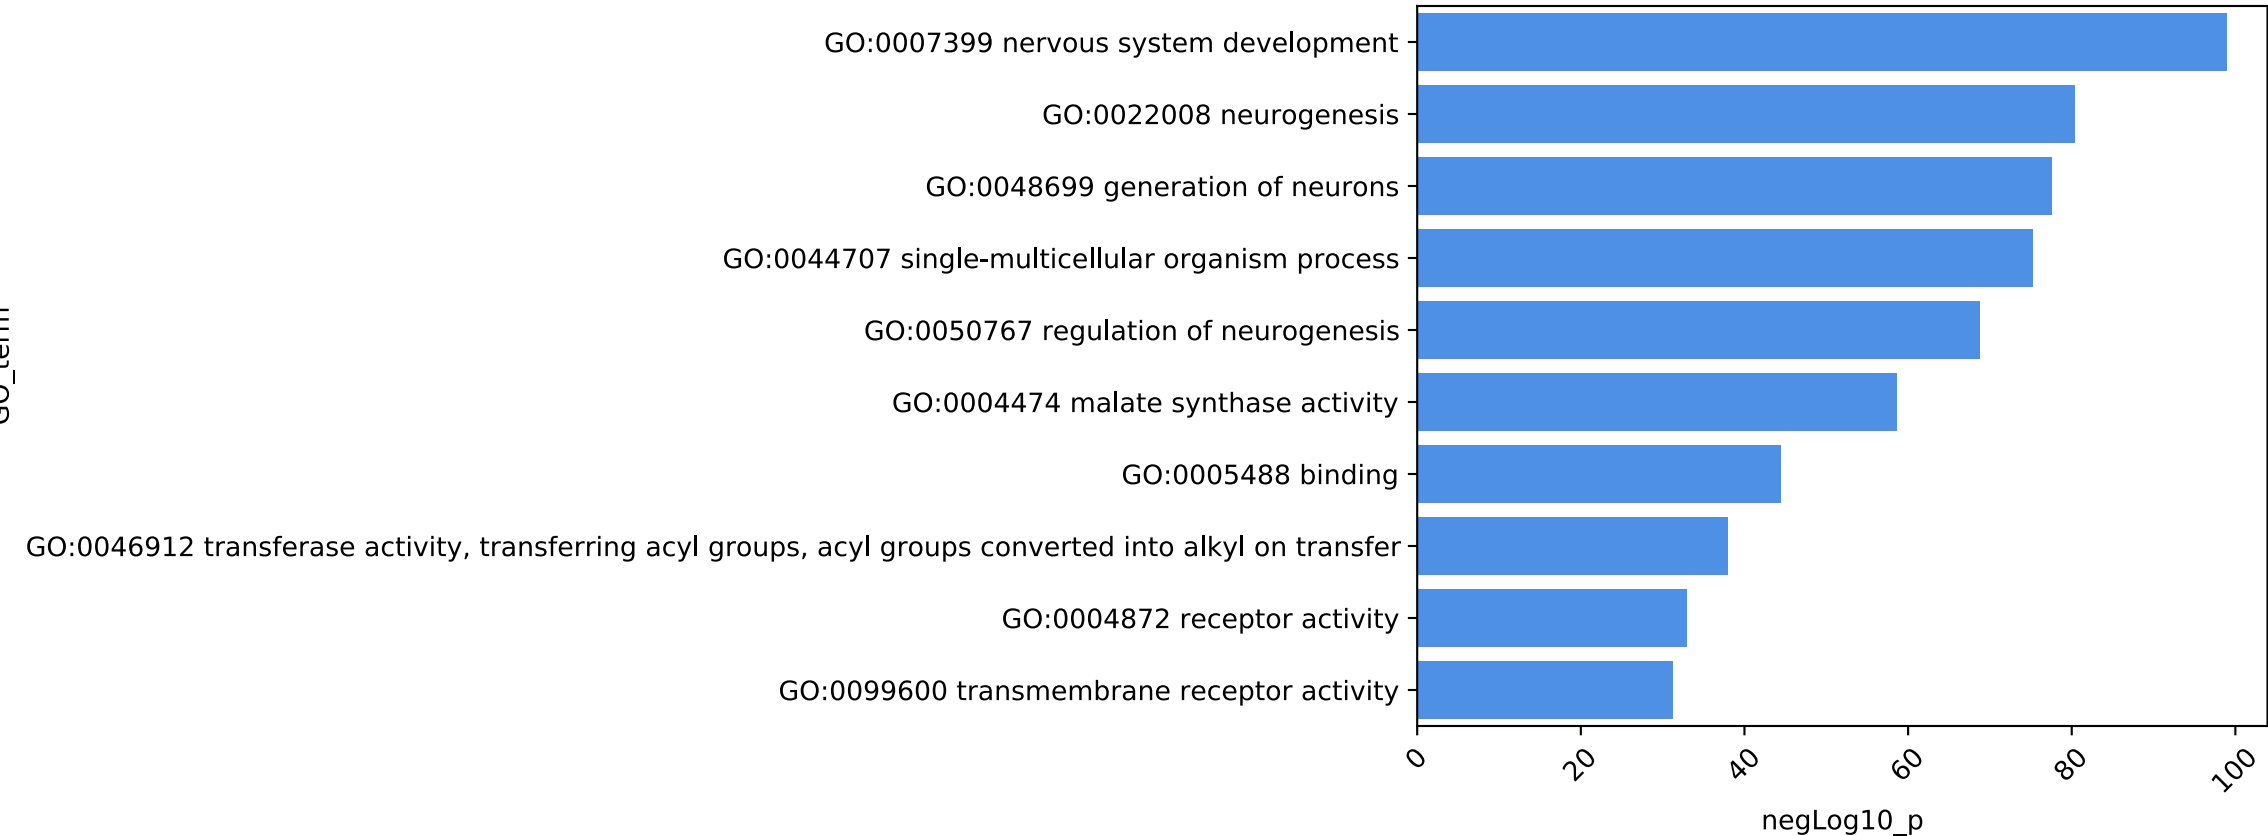

# EnhA19

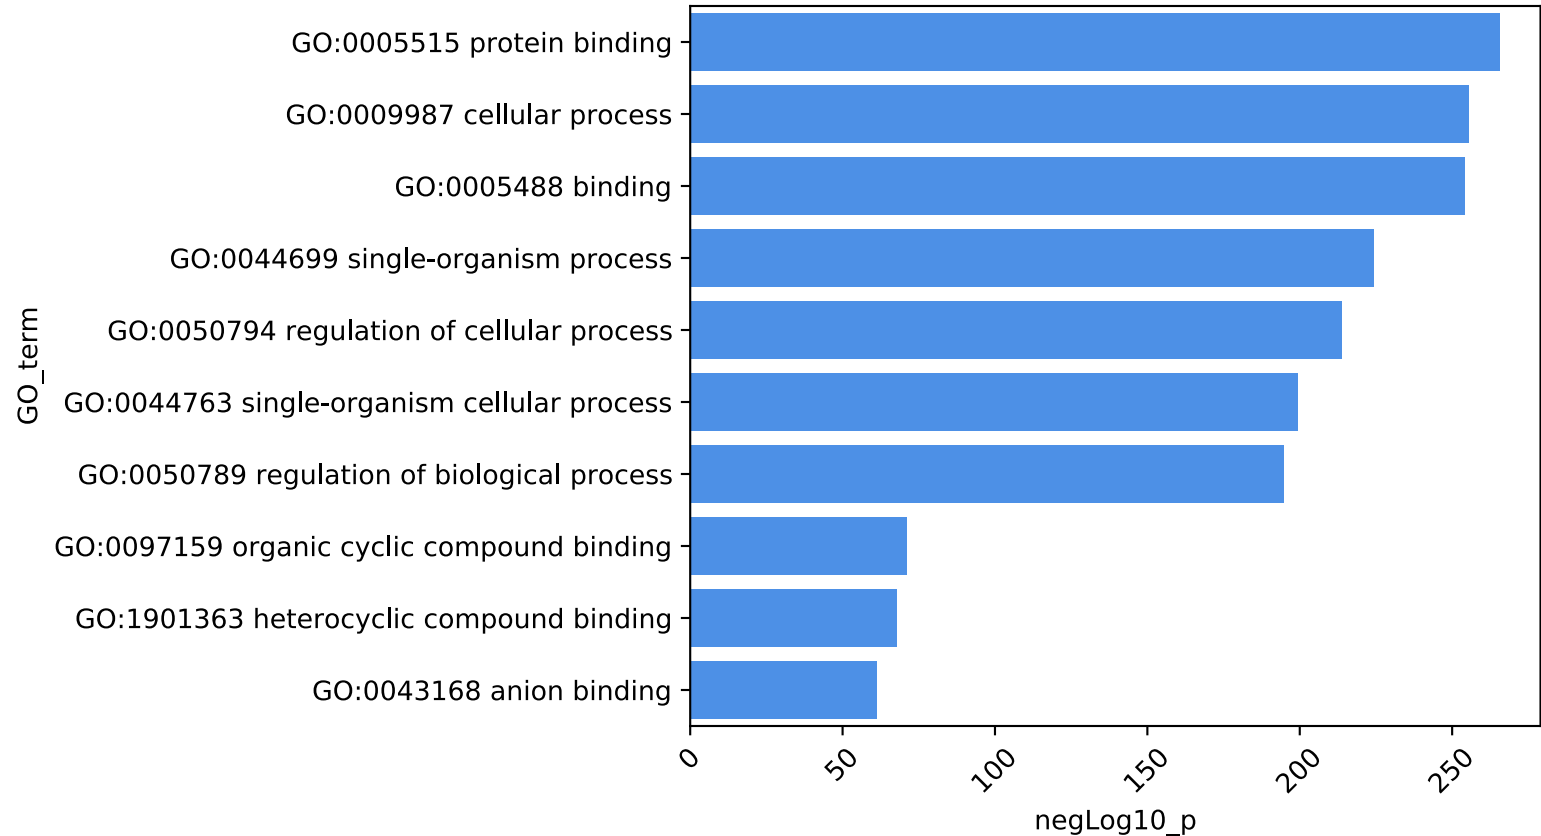



# EnhA20

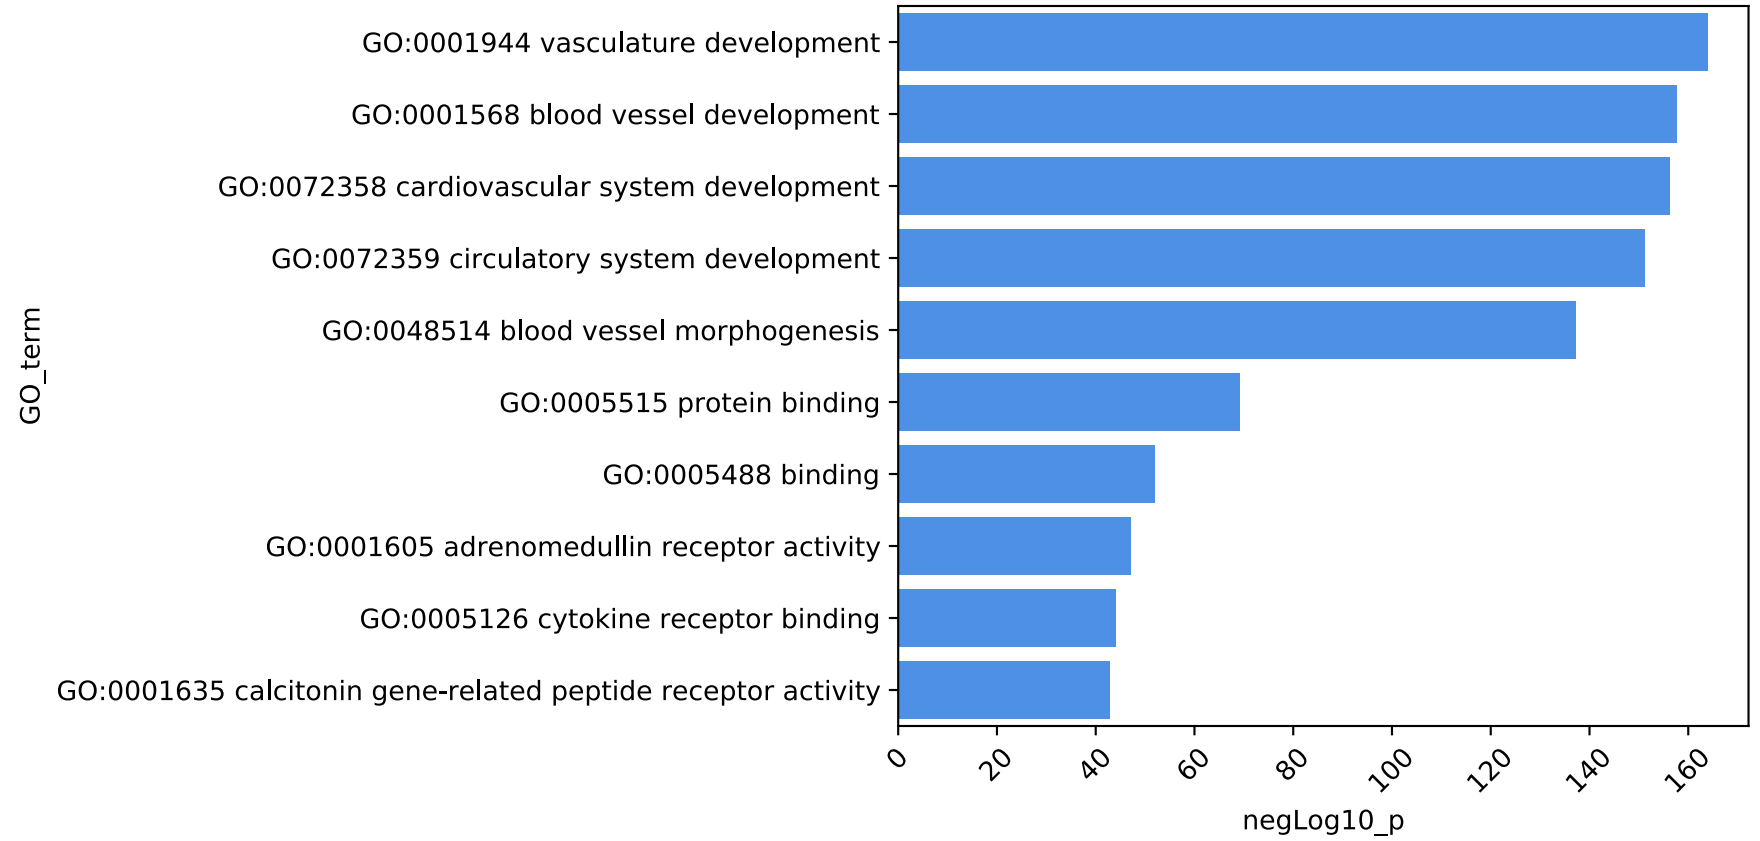

# EnhWk1

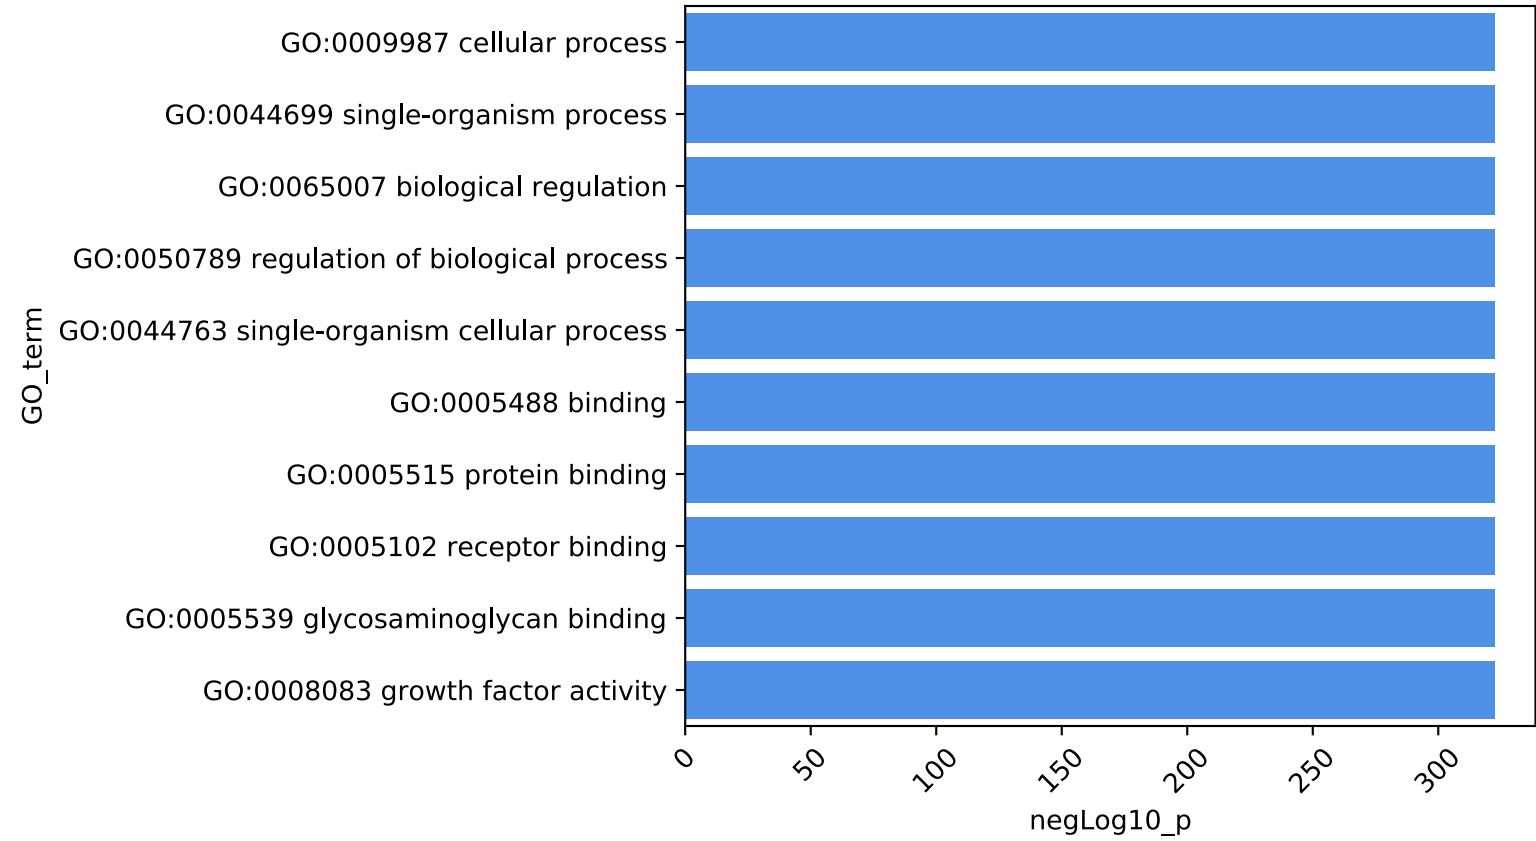

# EnhWk2

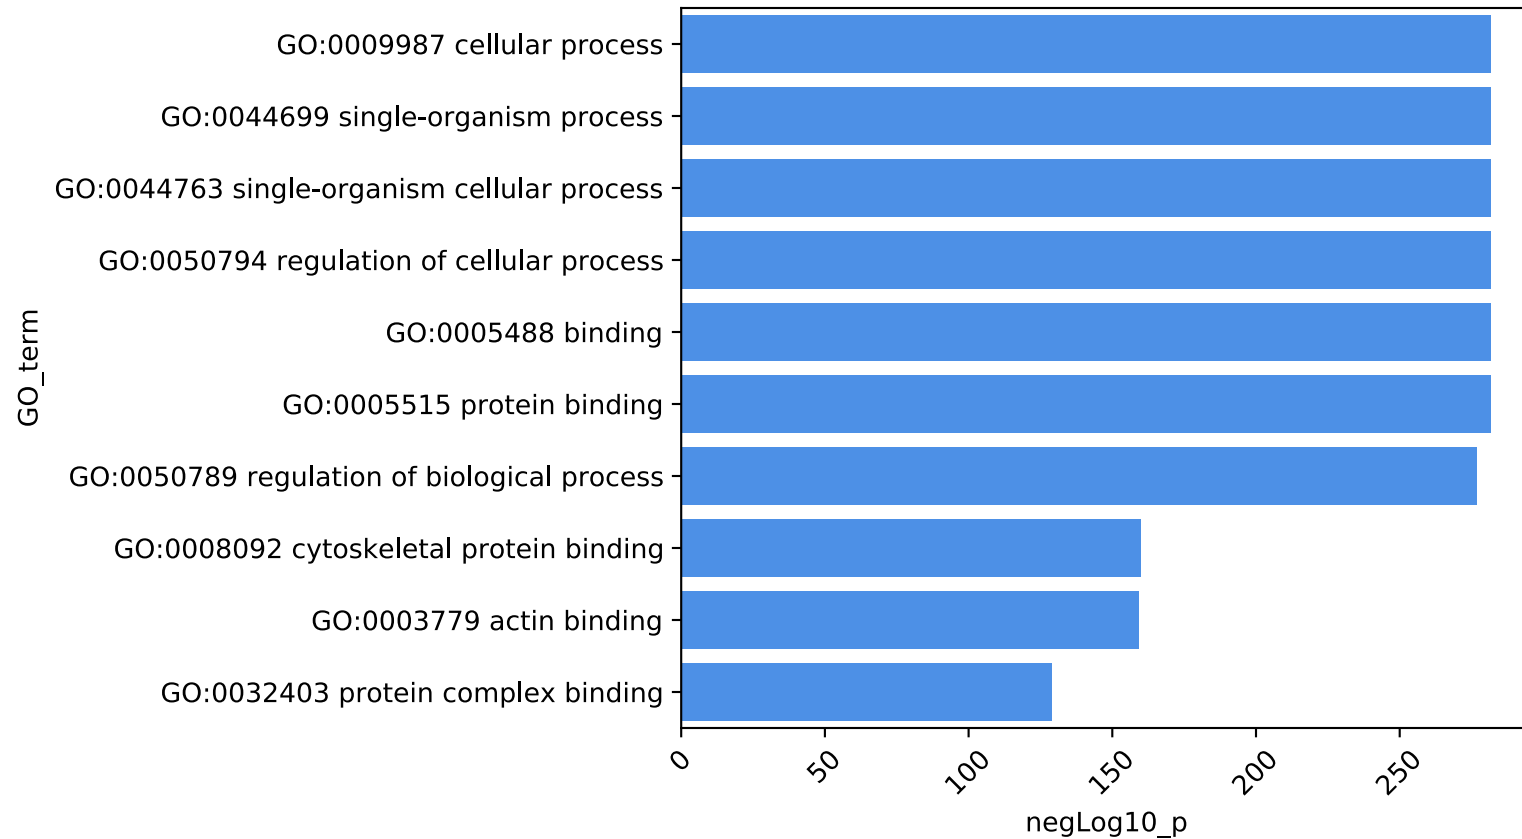

# EnhWk3

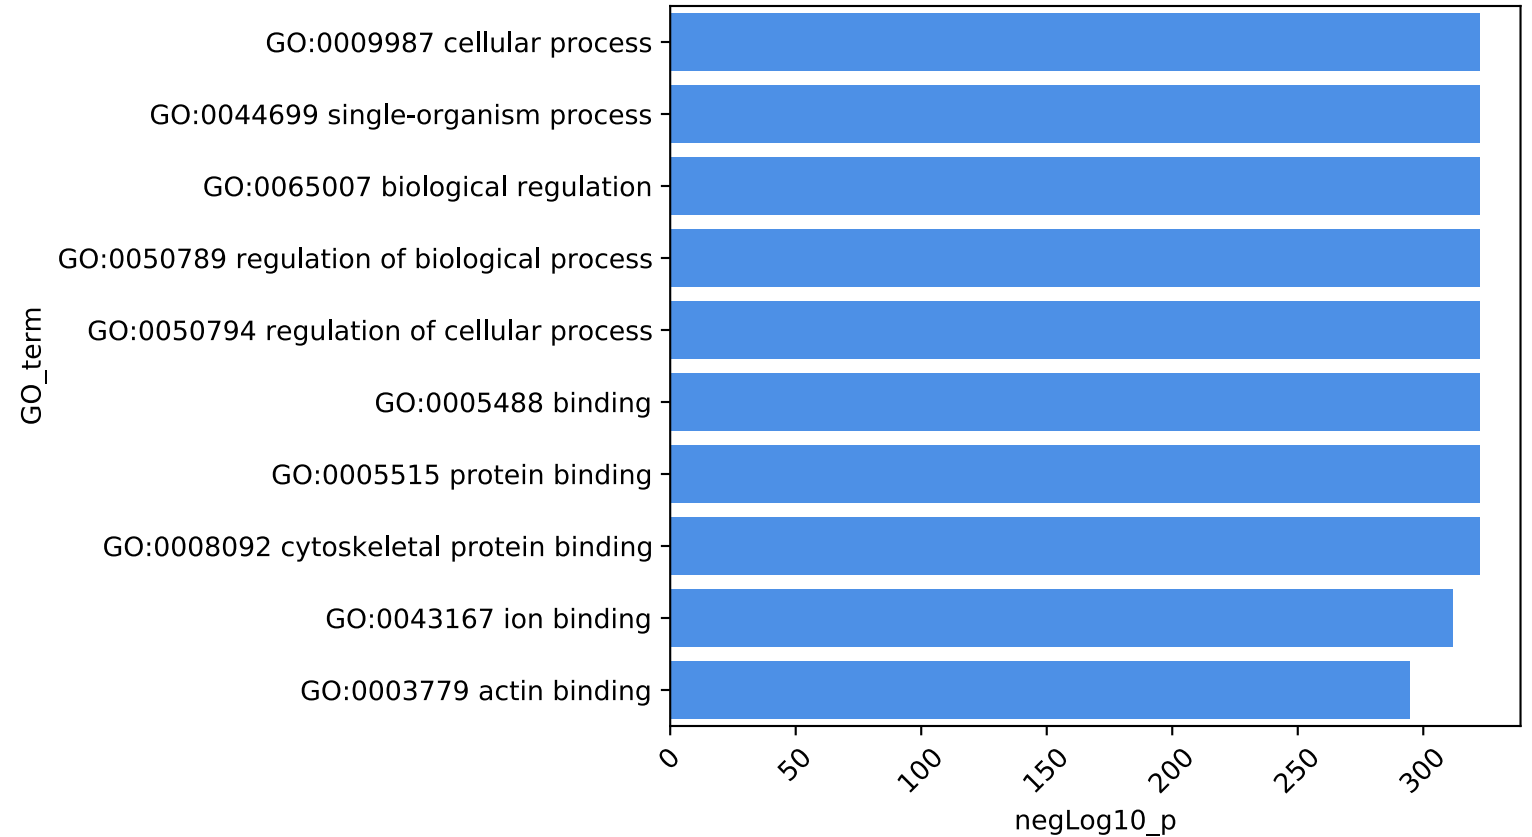

# EnhWk4

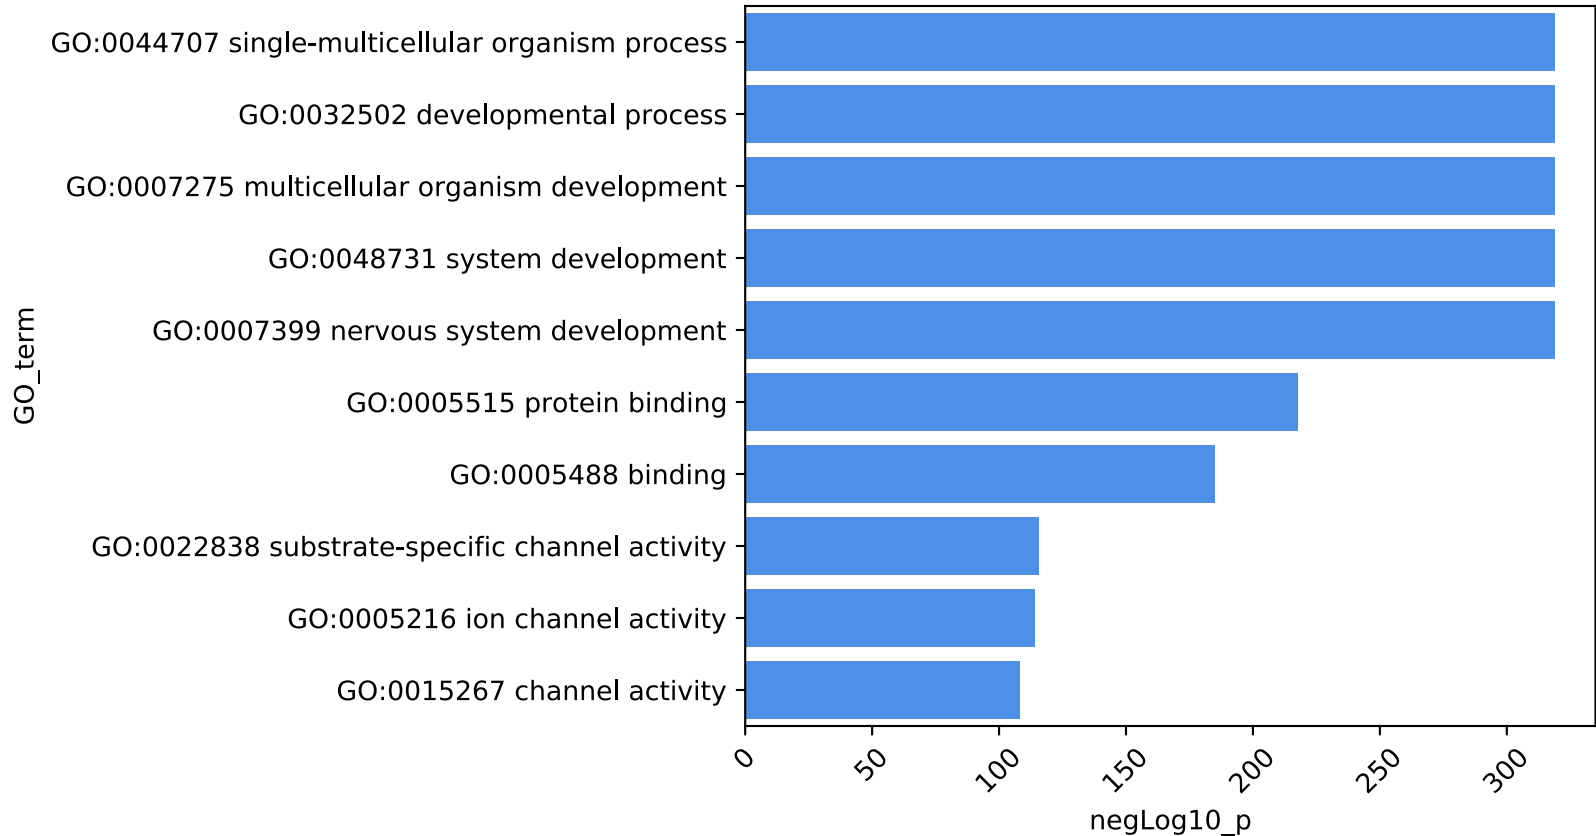

# EnhWk5

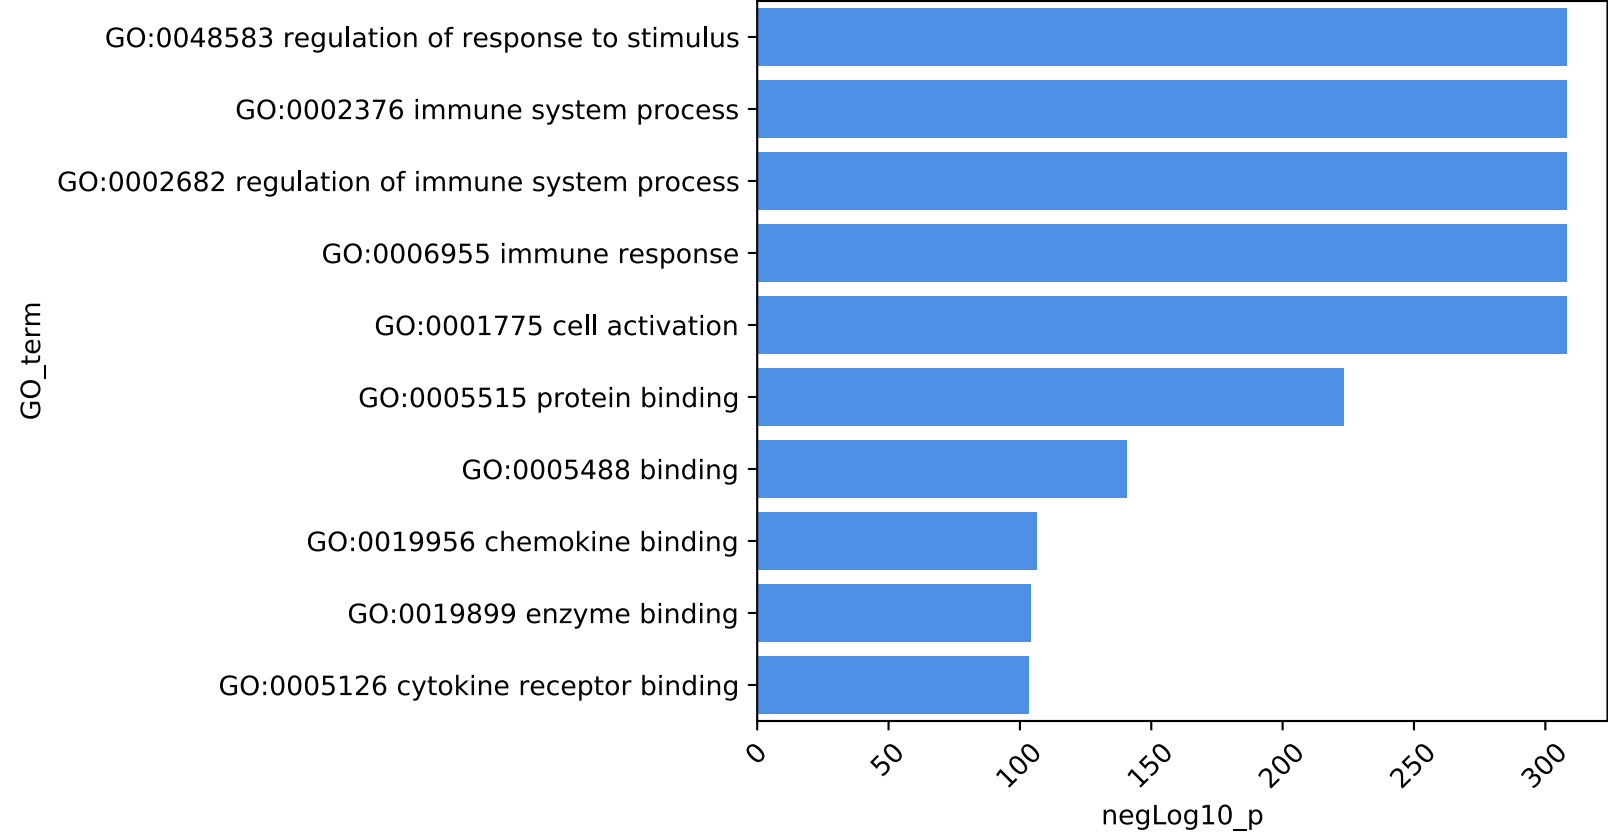

# EnhWk6

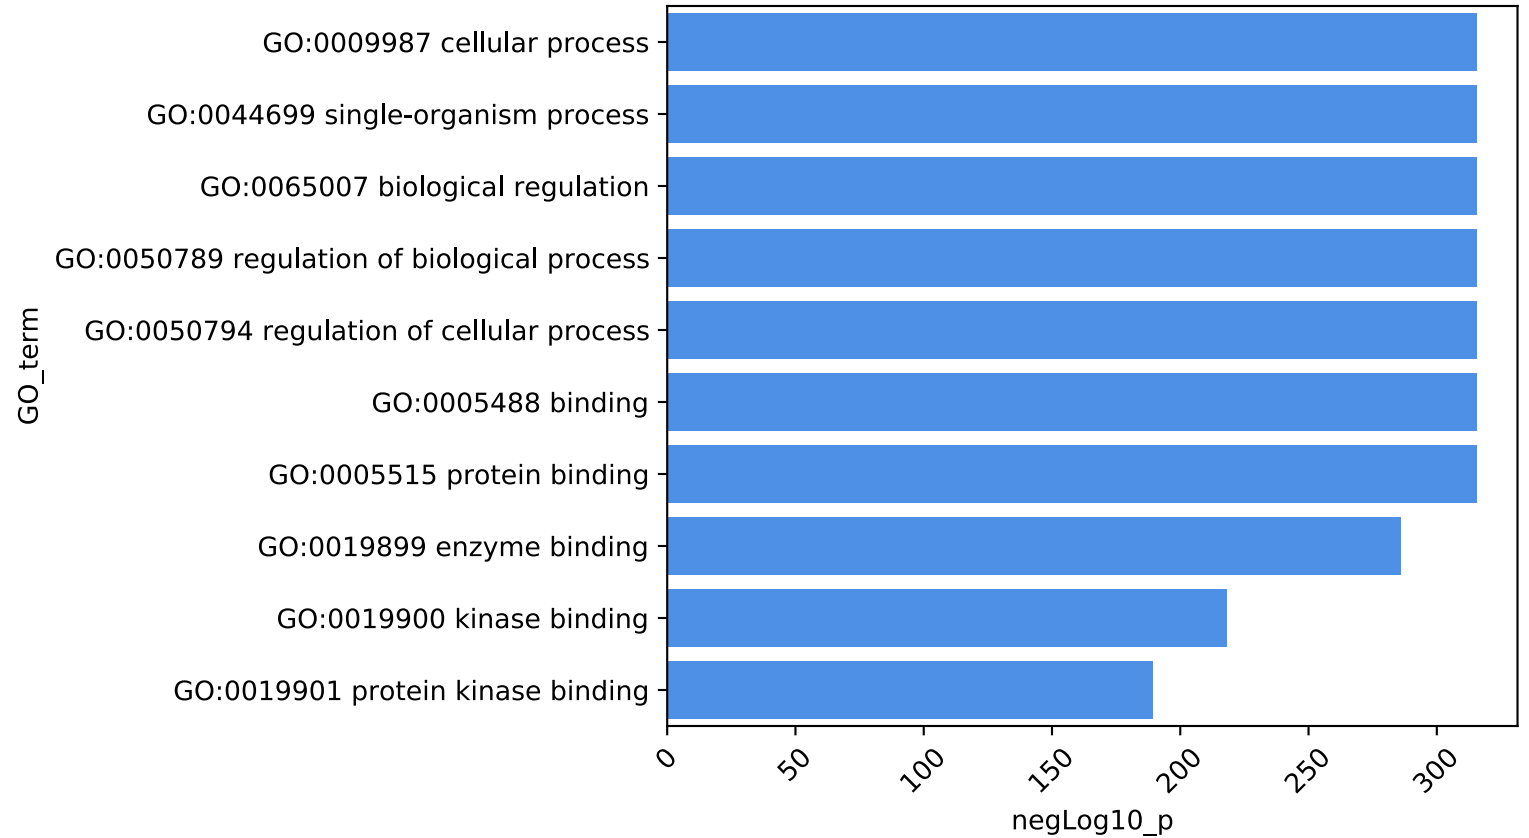

# EnhWk7

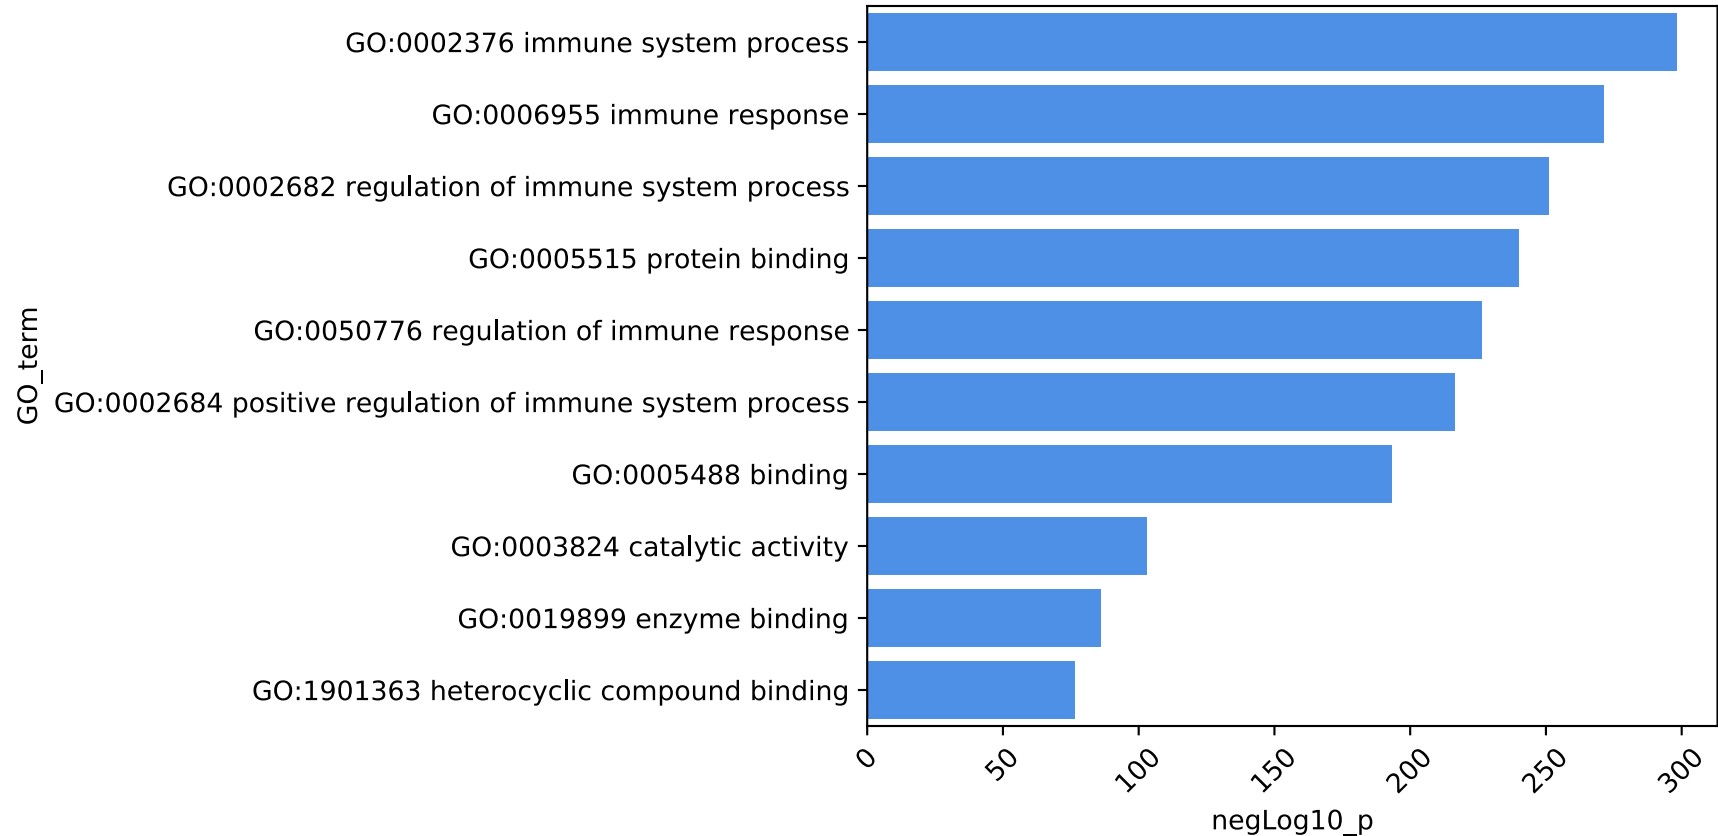



# EnhWk8

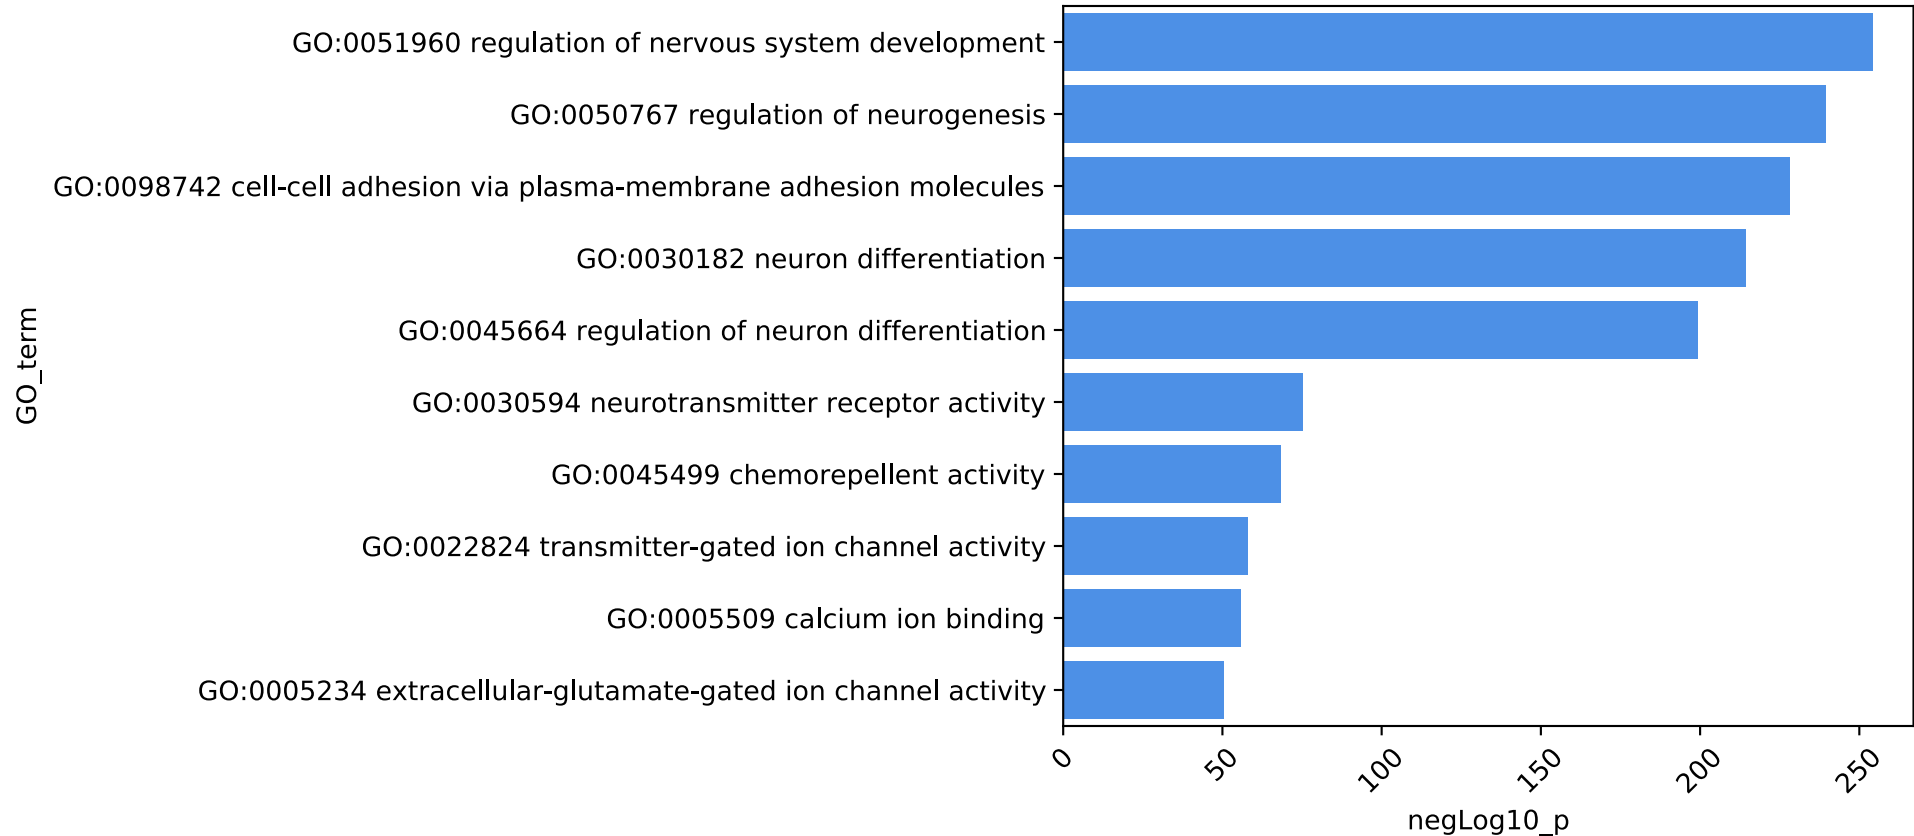

# GapArtf1

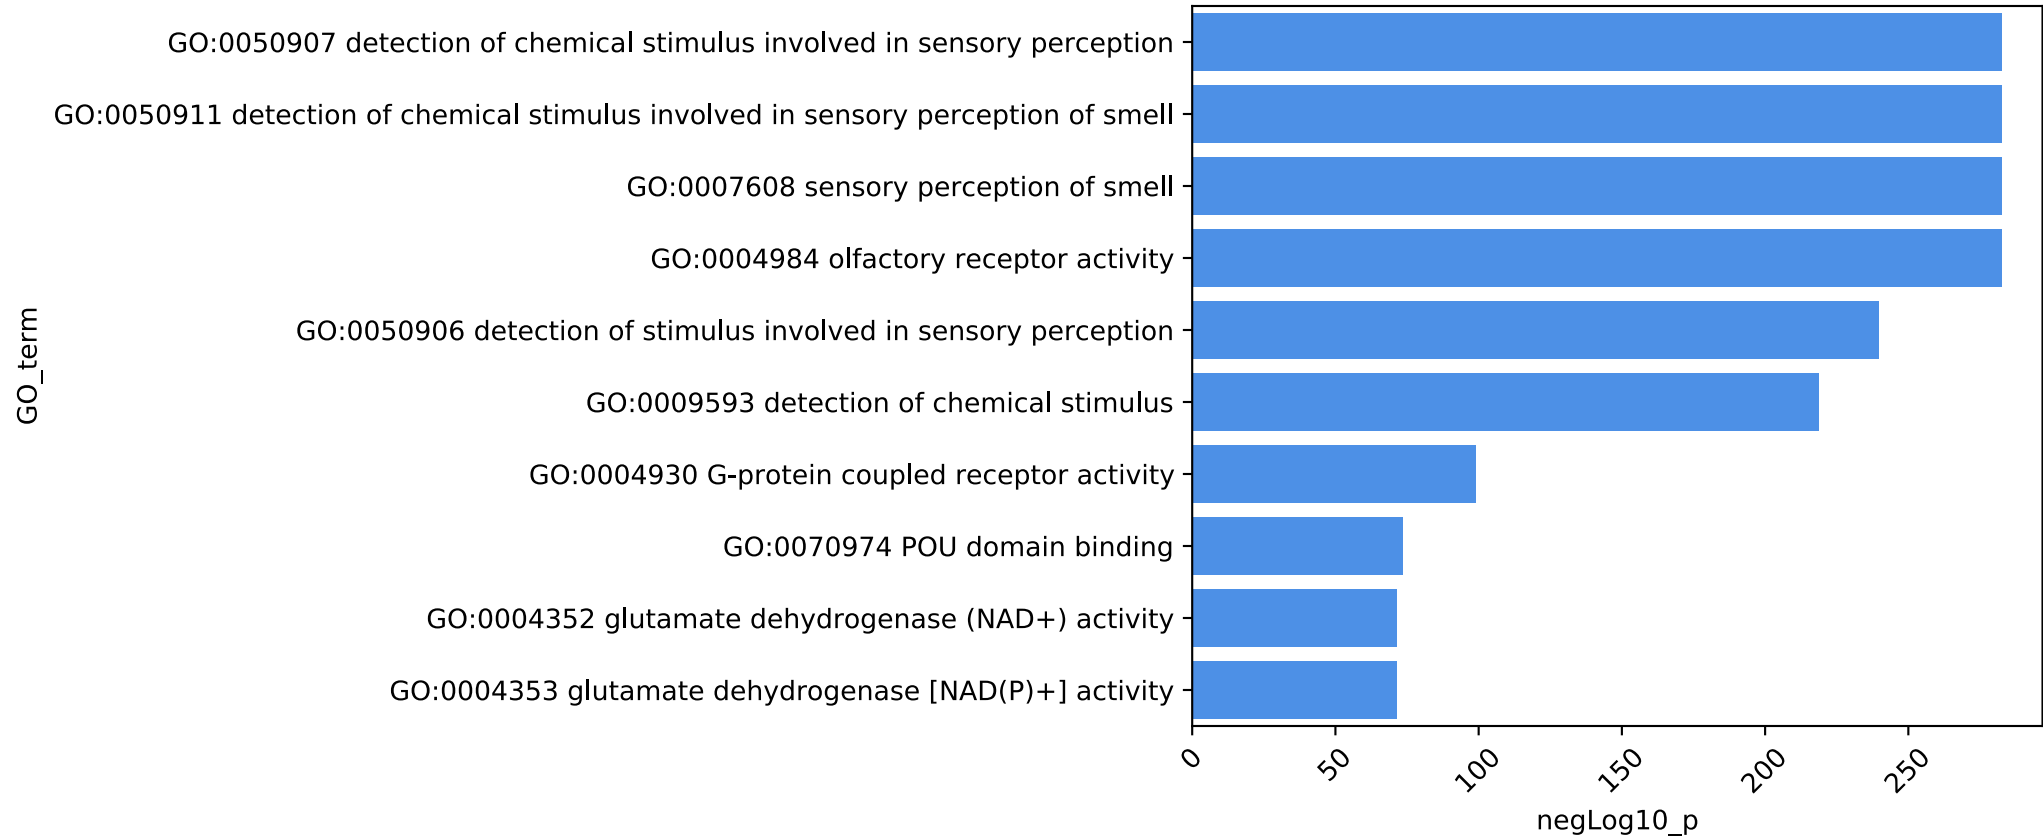

## GapArtf2

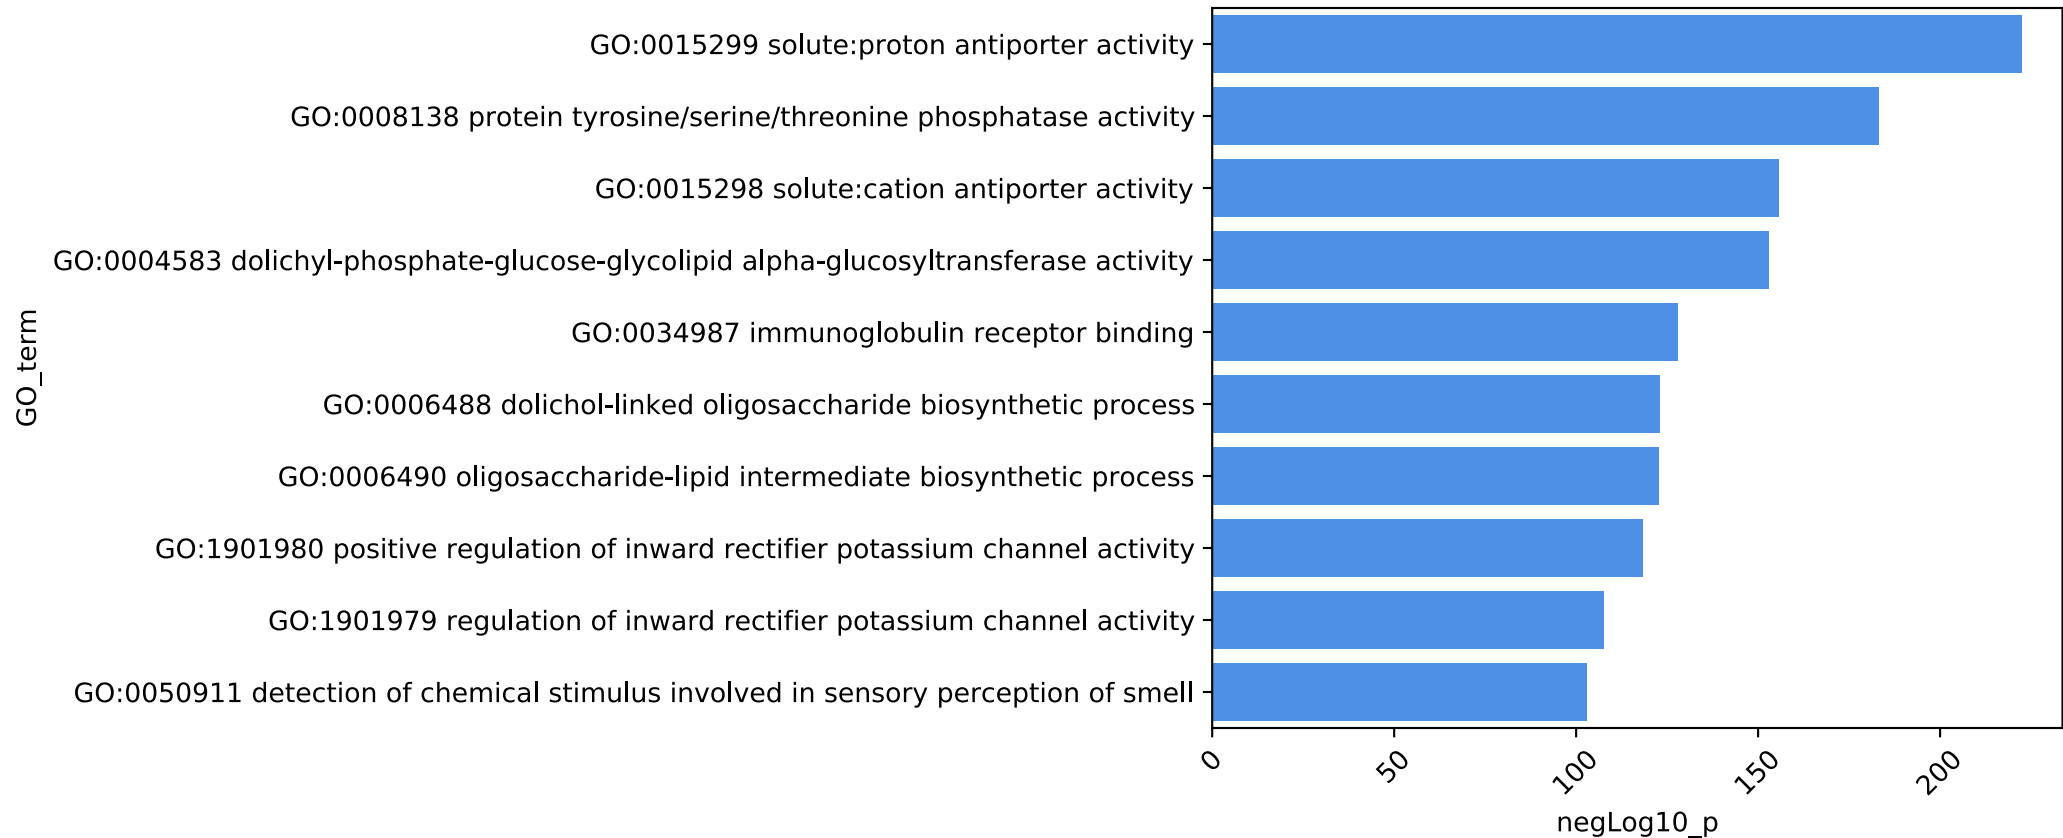

### GapArtf3

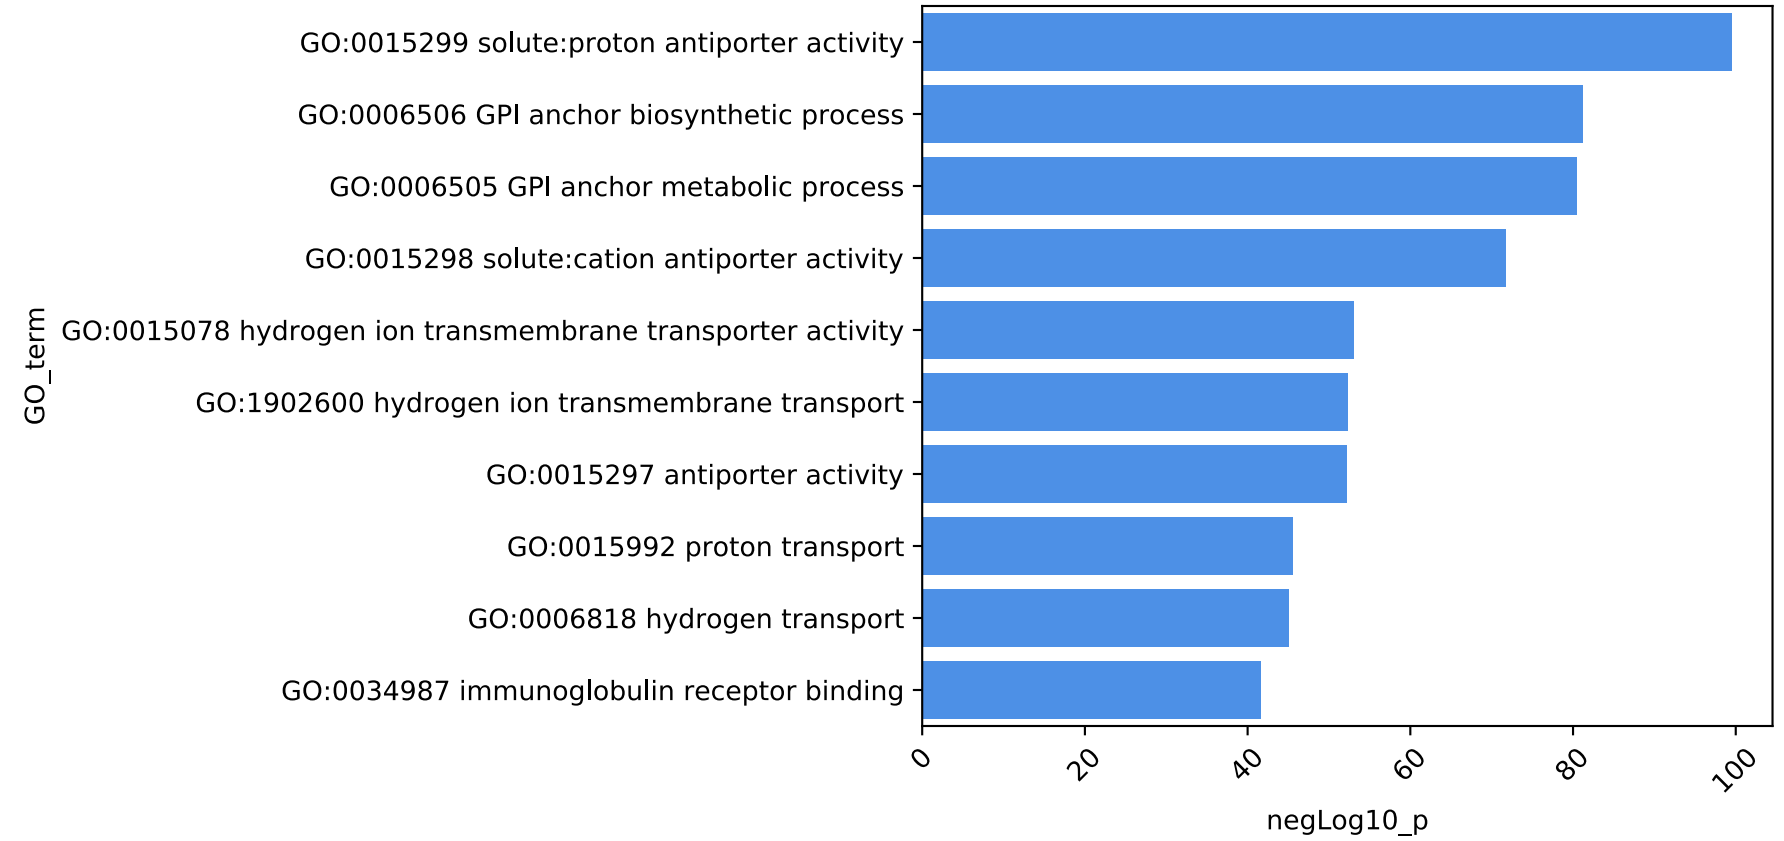

## HET1

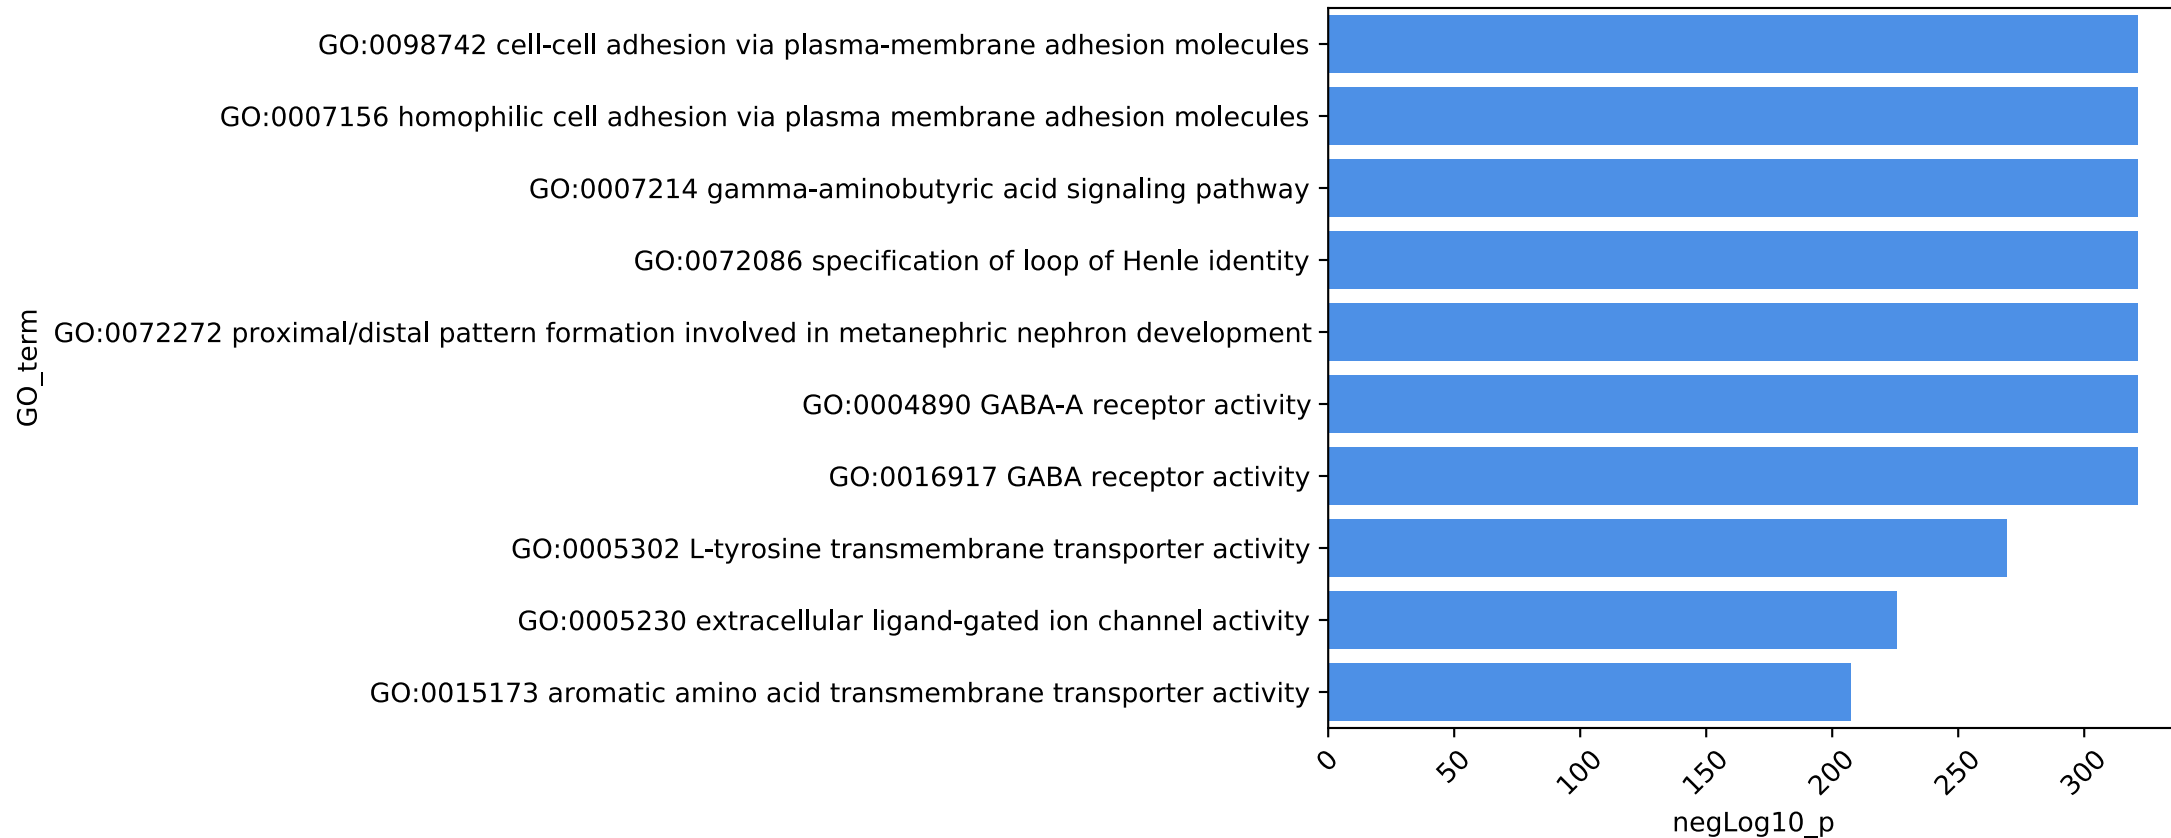

## HET2

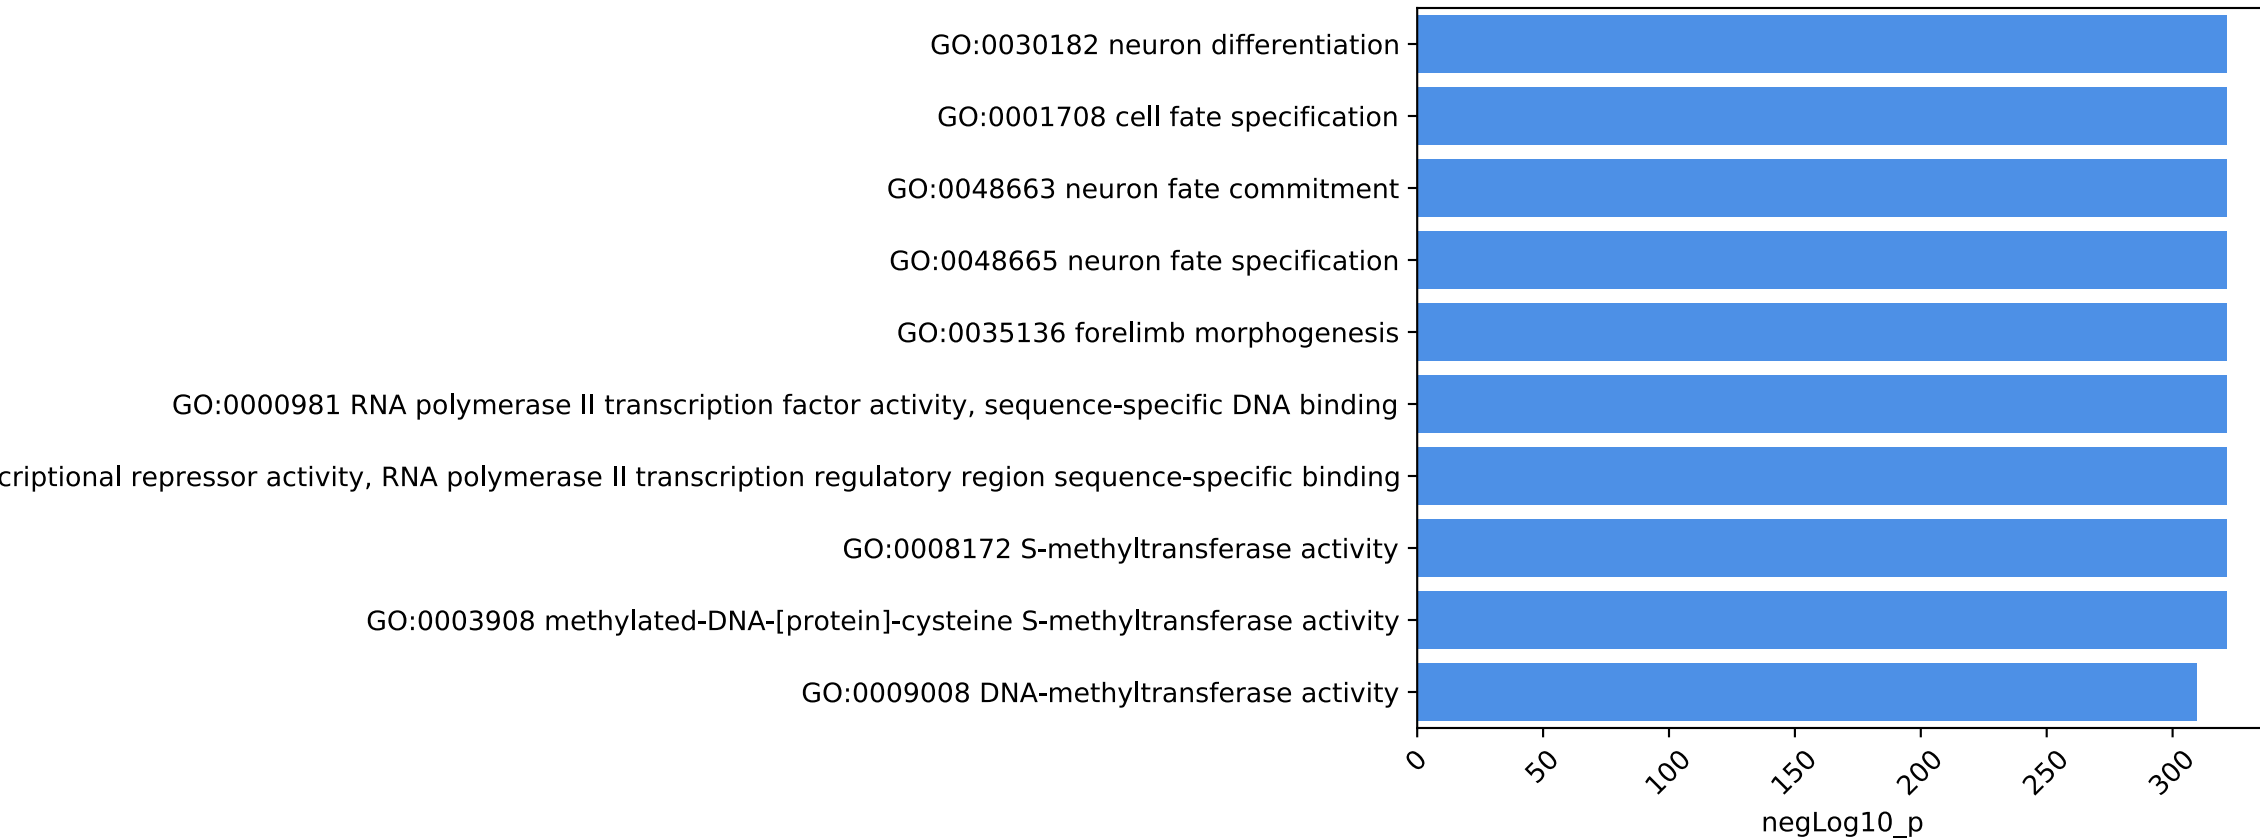

## HET3

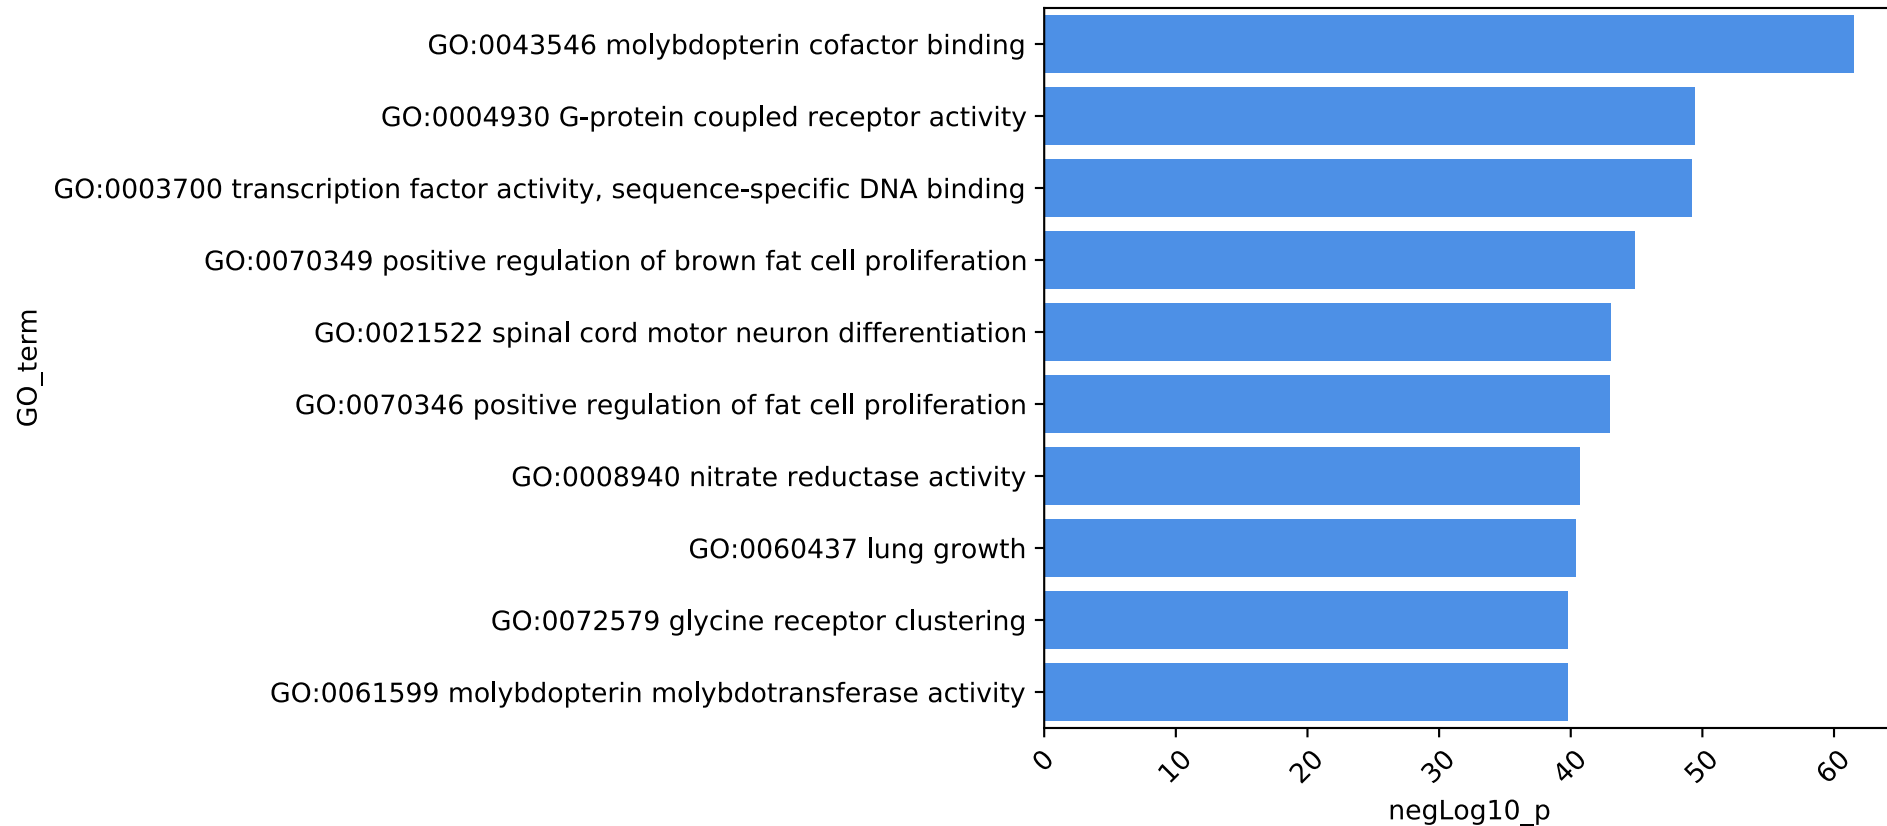

## HET4

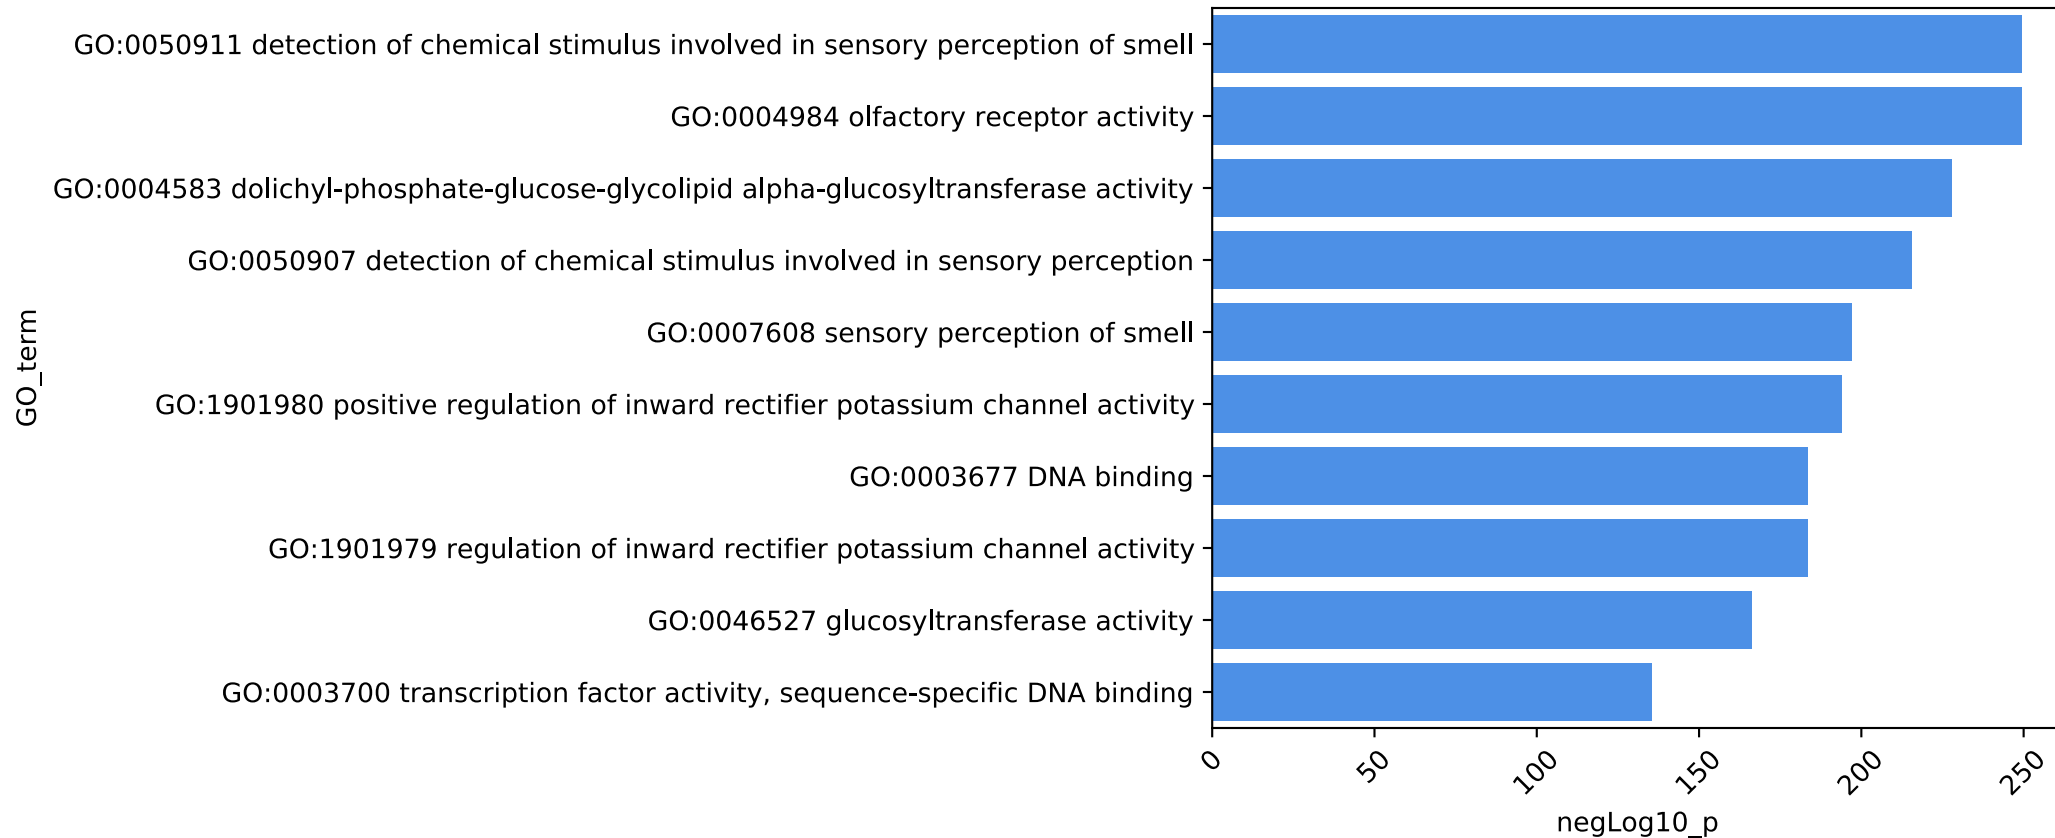



## HET5

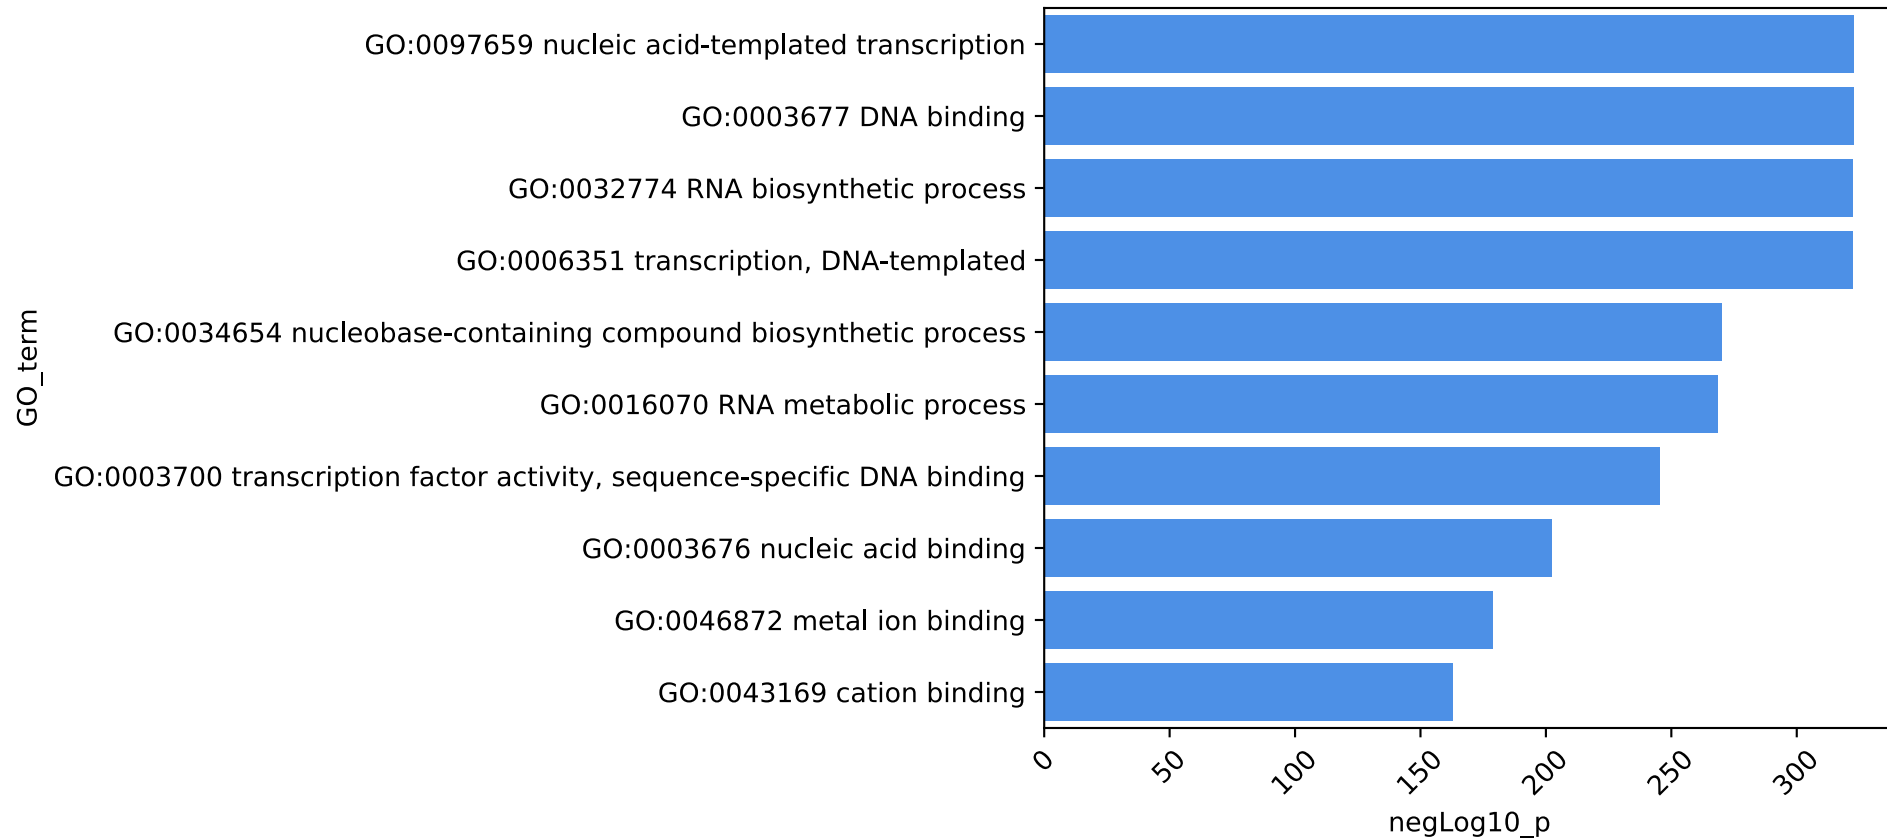

## HET6

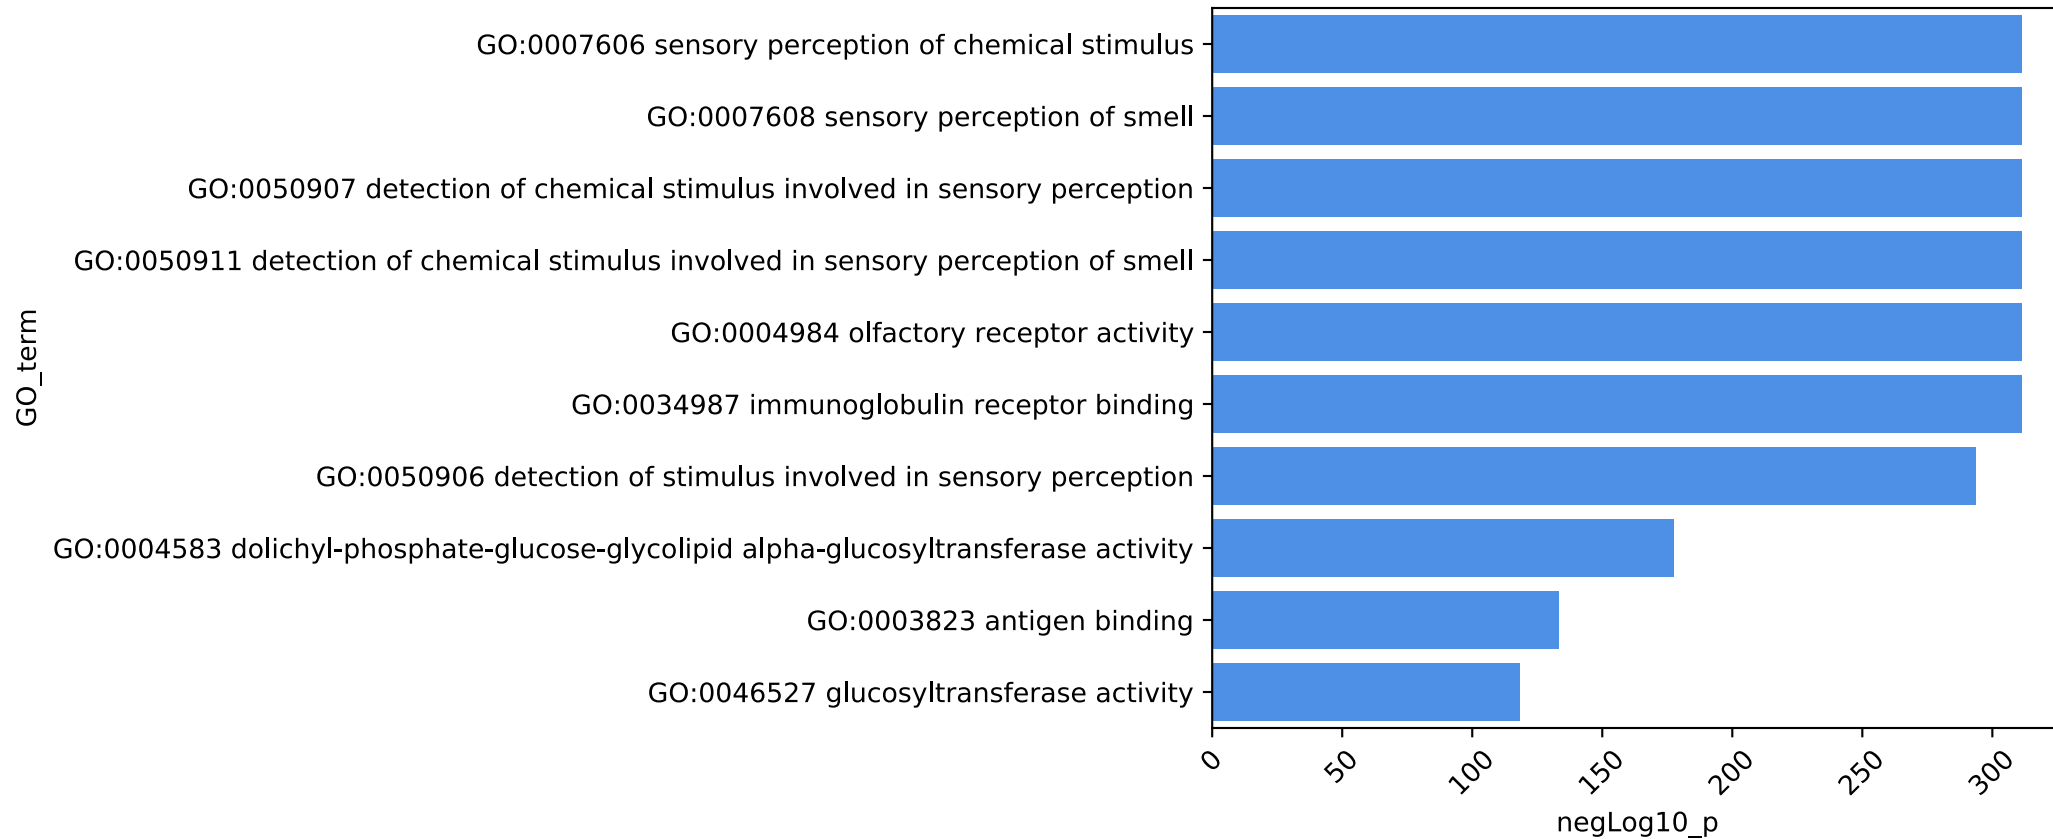

## HET7

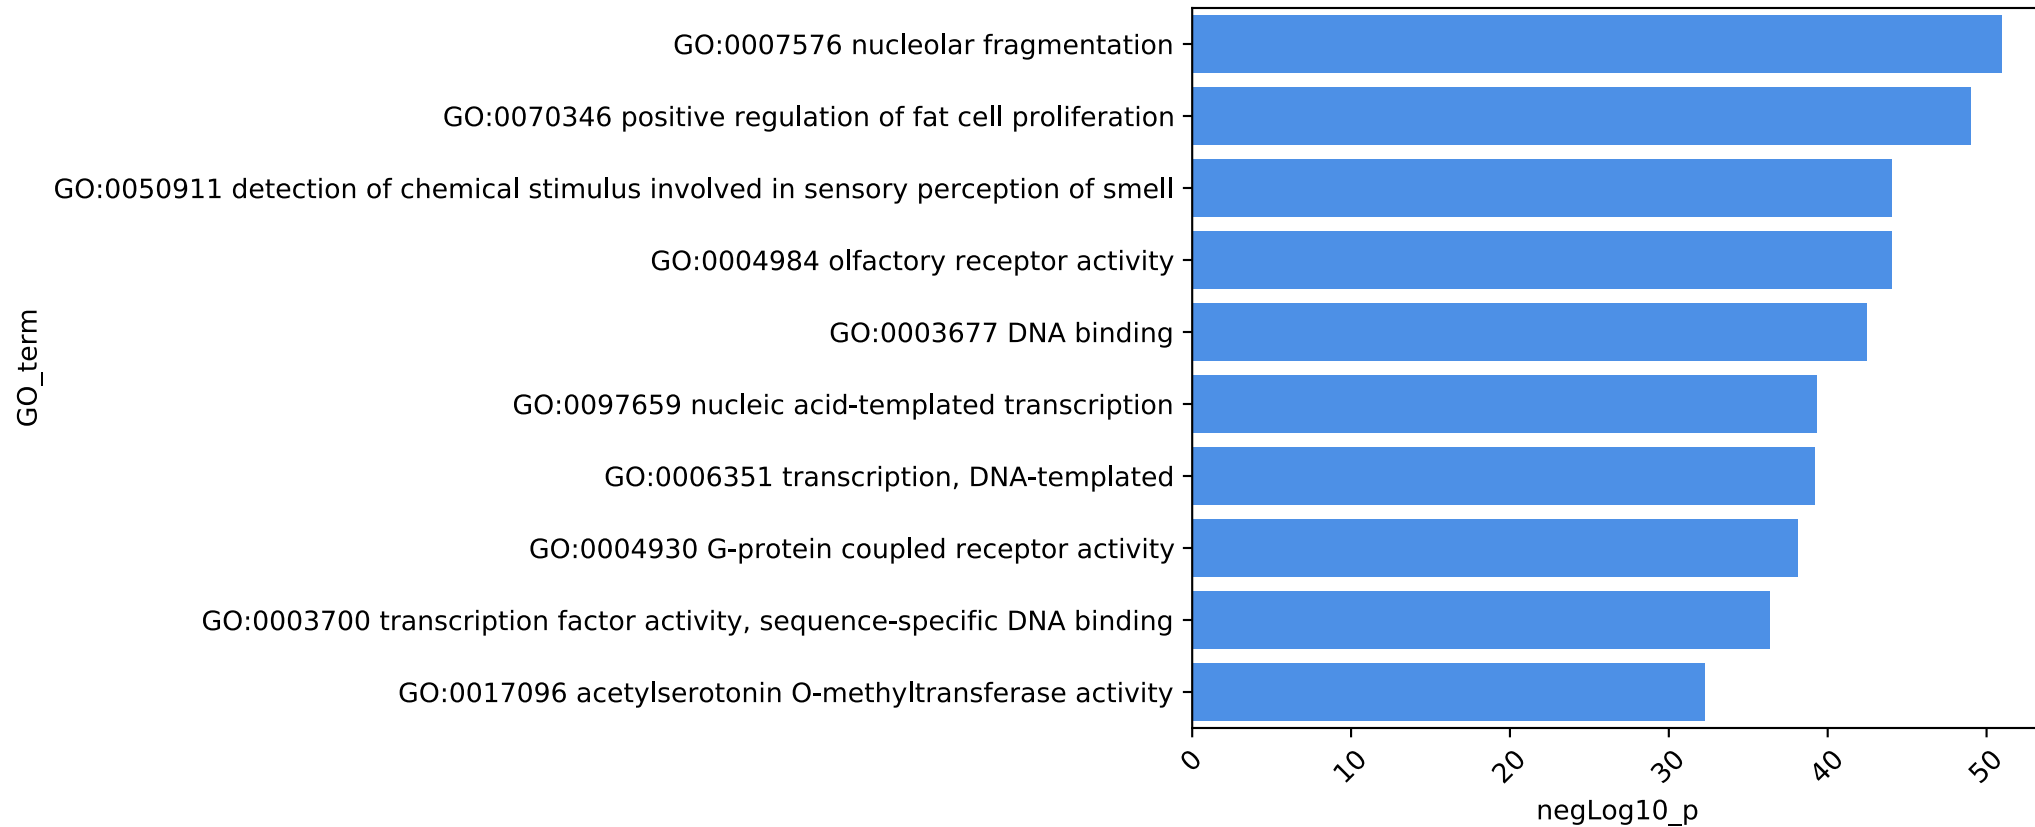

## HET8

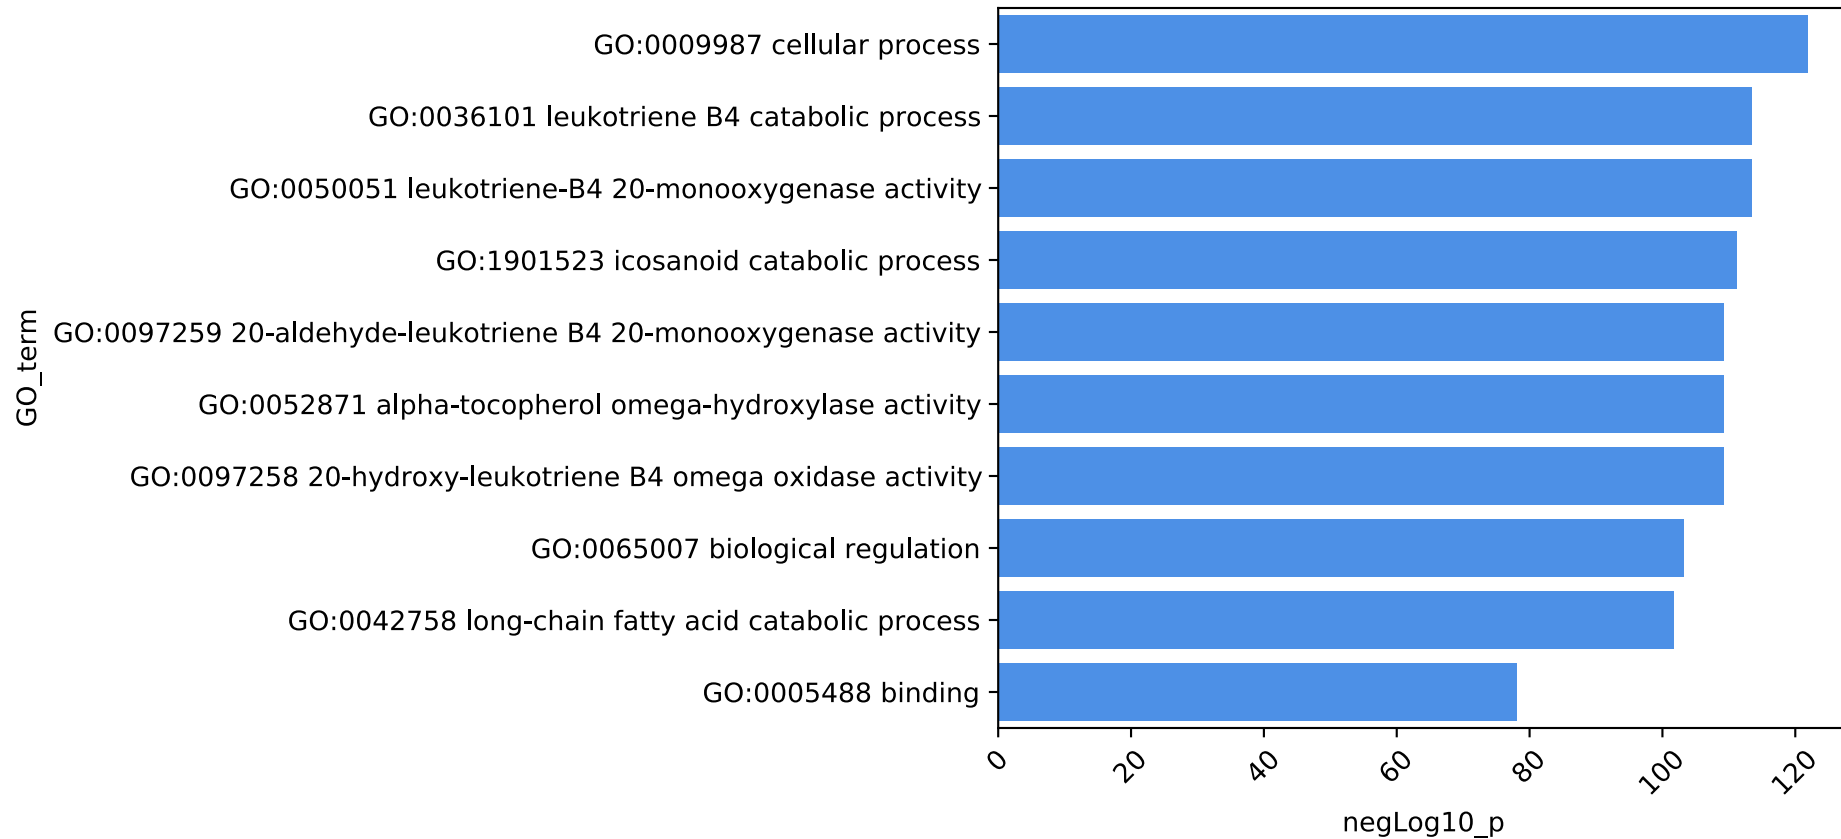

## HET9

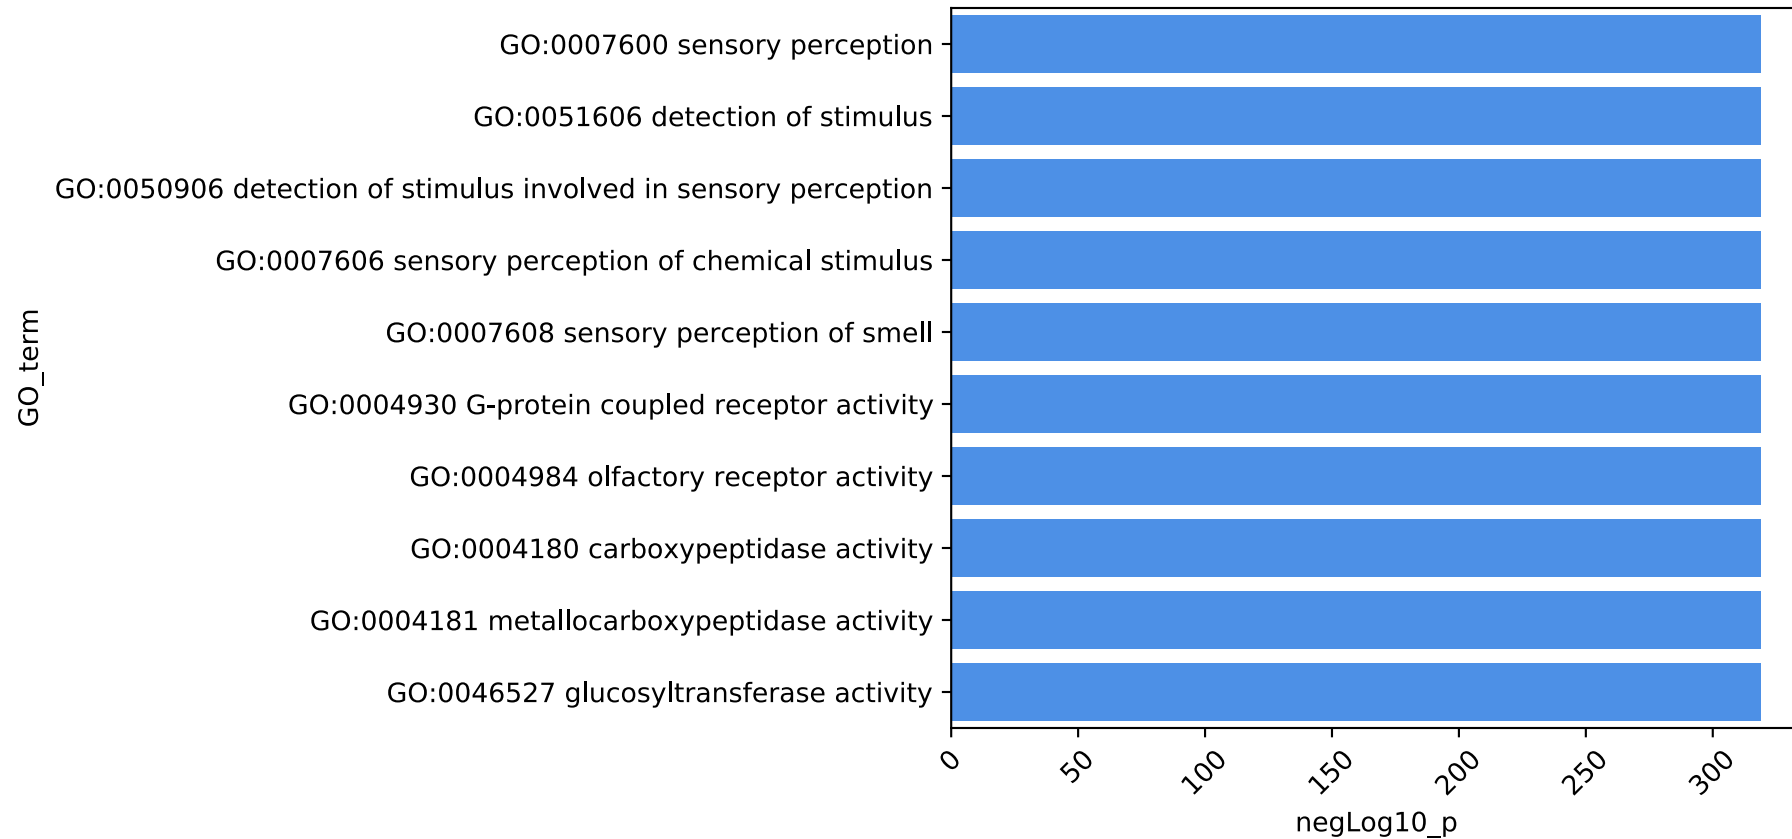

# PromF1

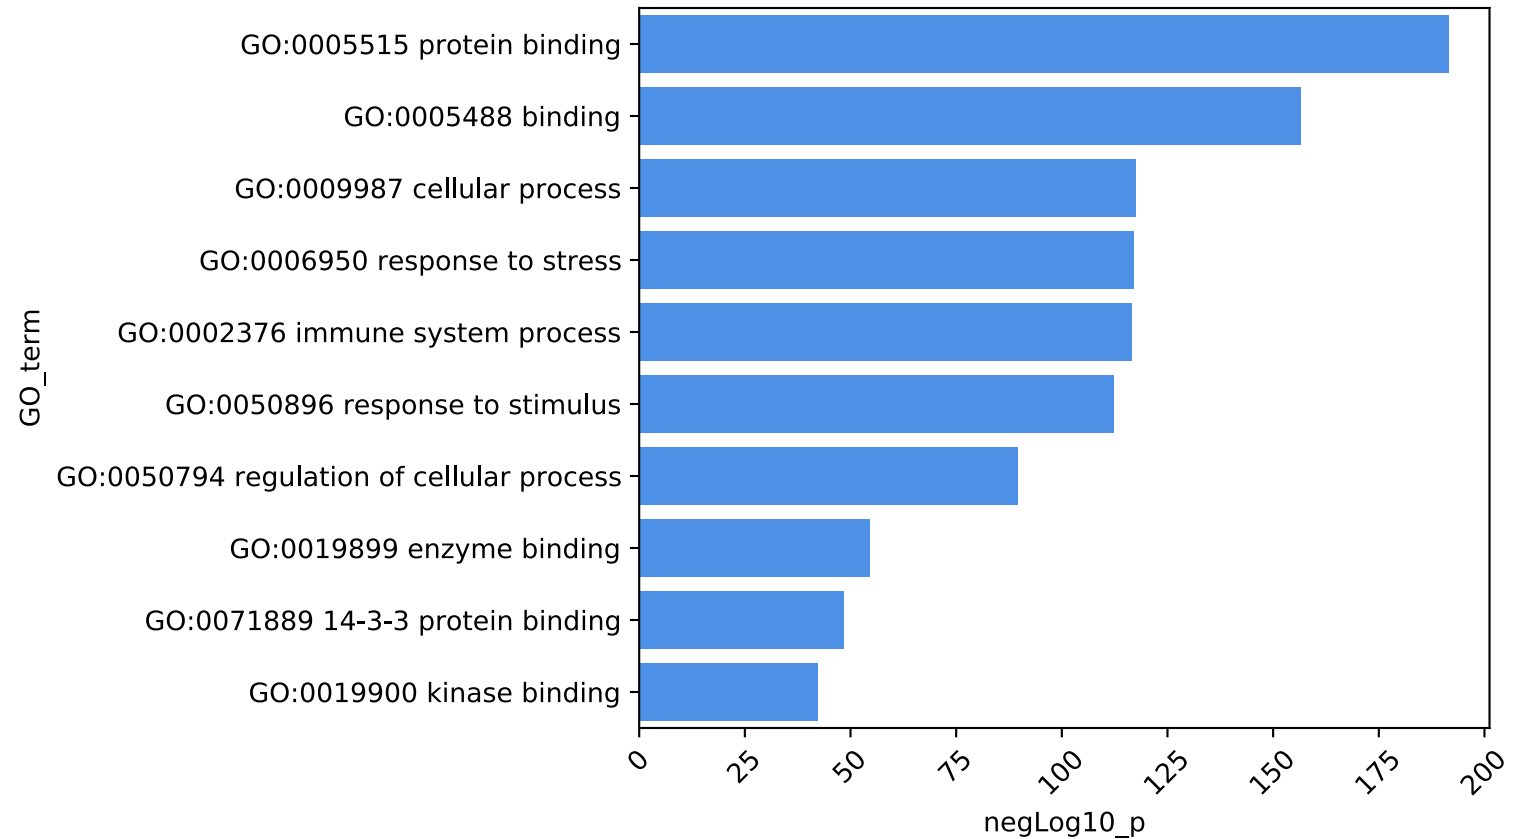

# PromF2

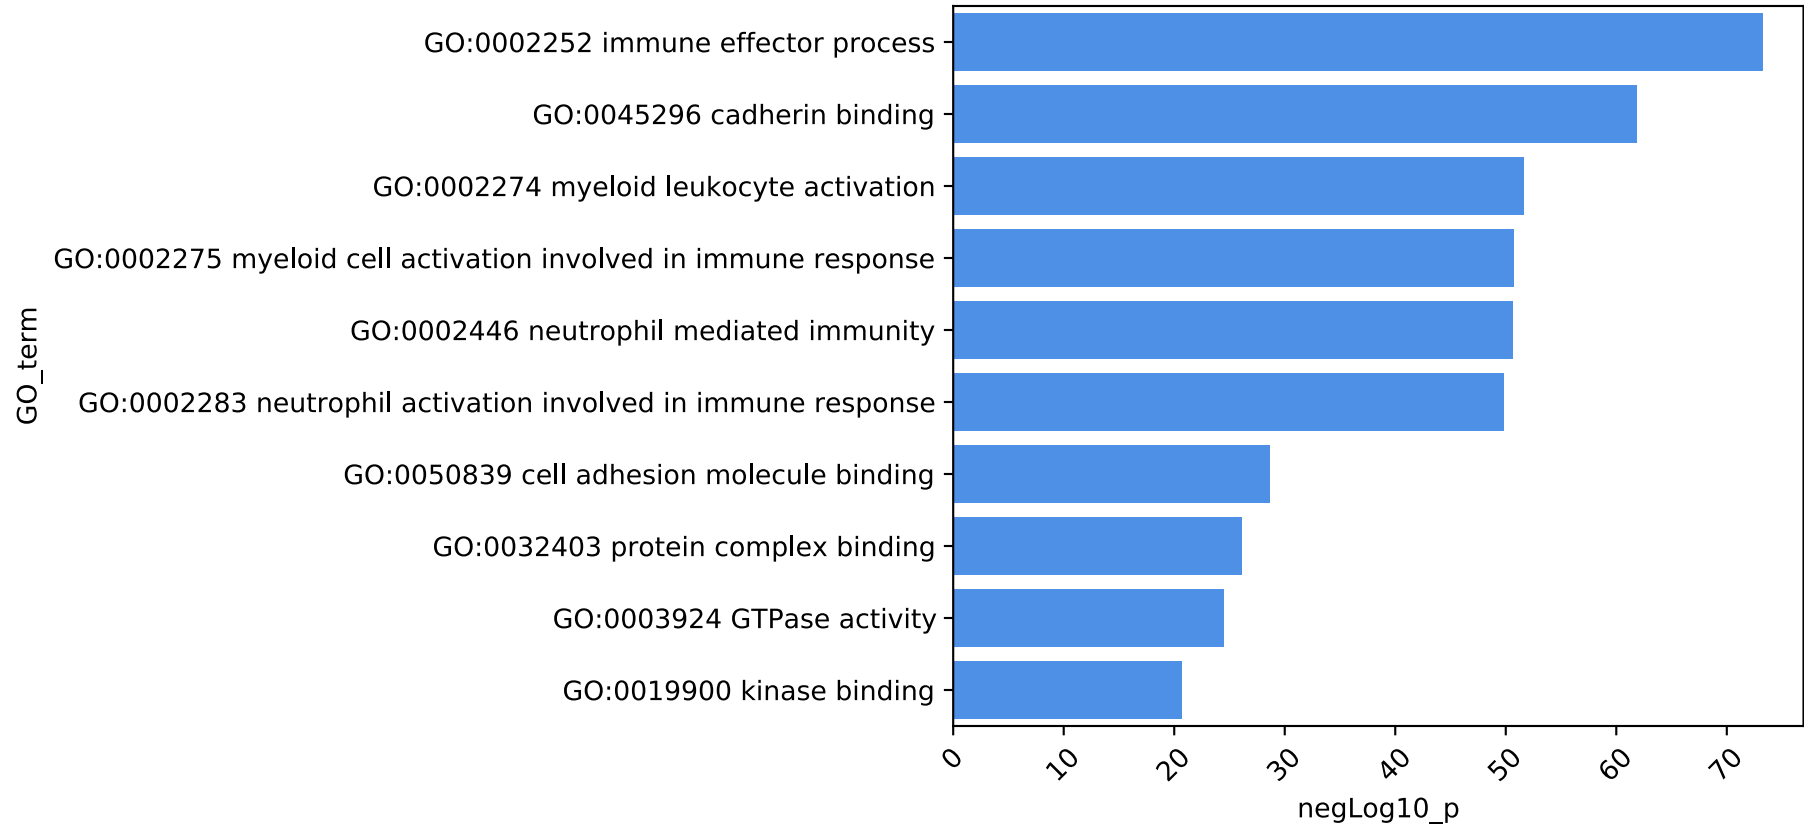

# PromF3

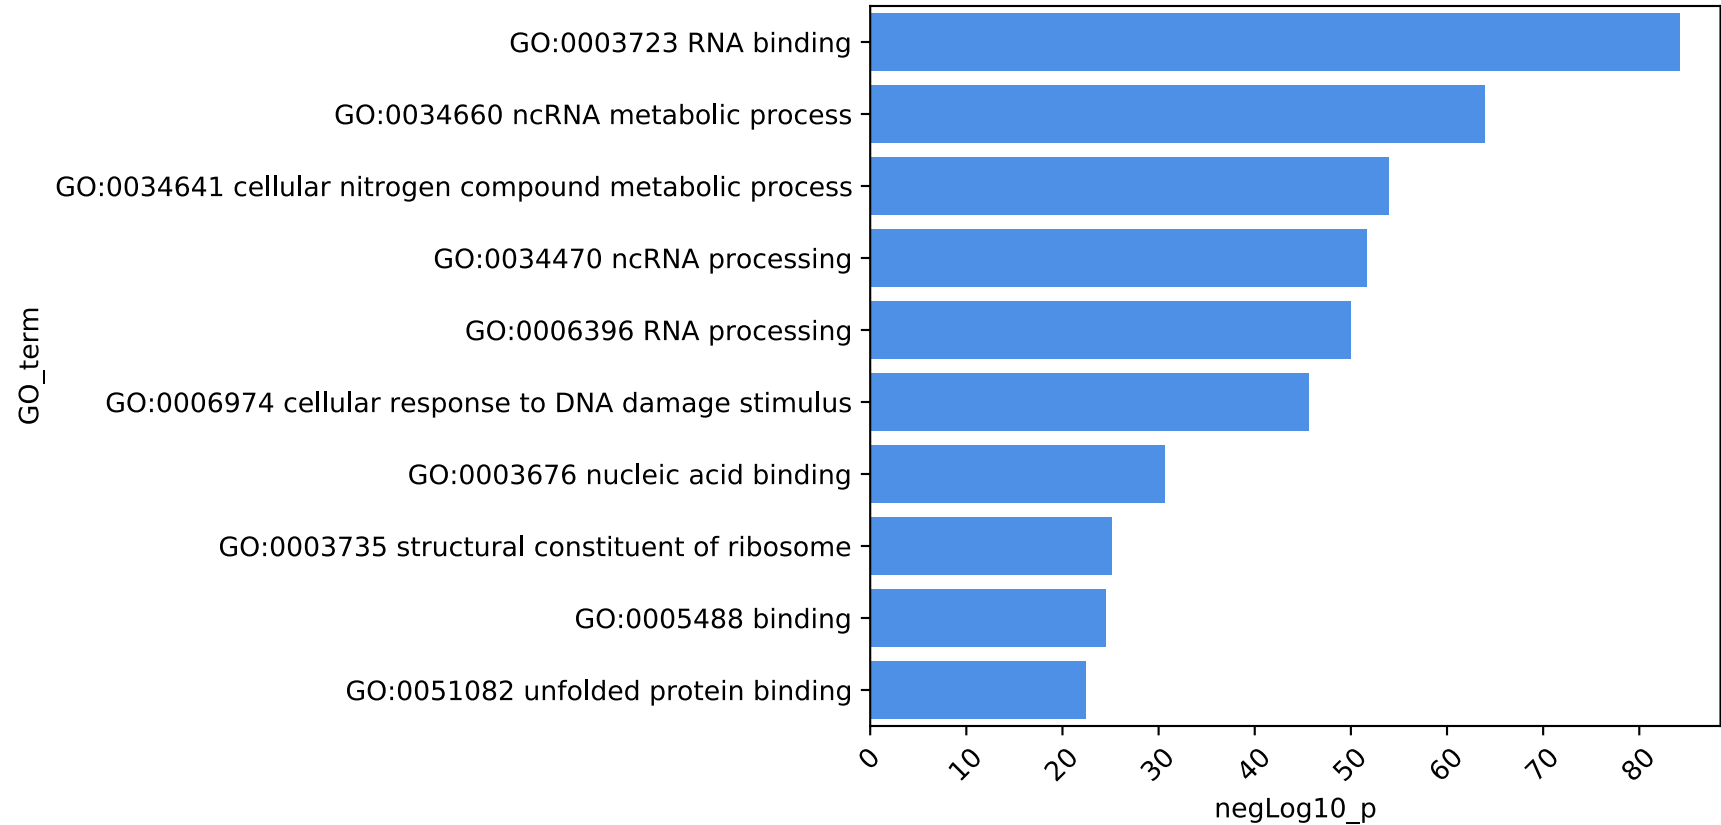



# PromF4

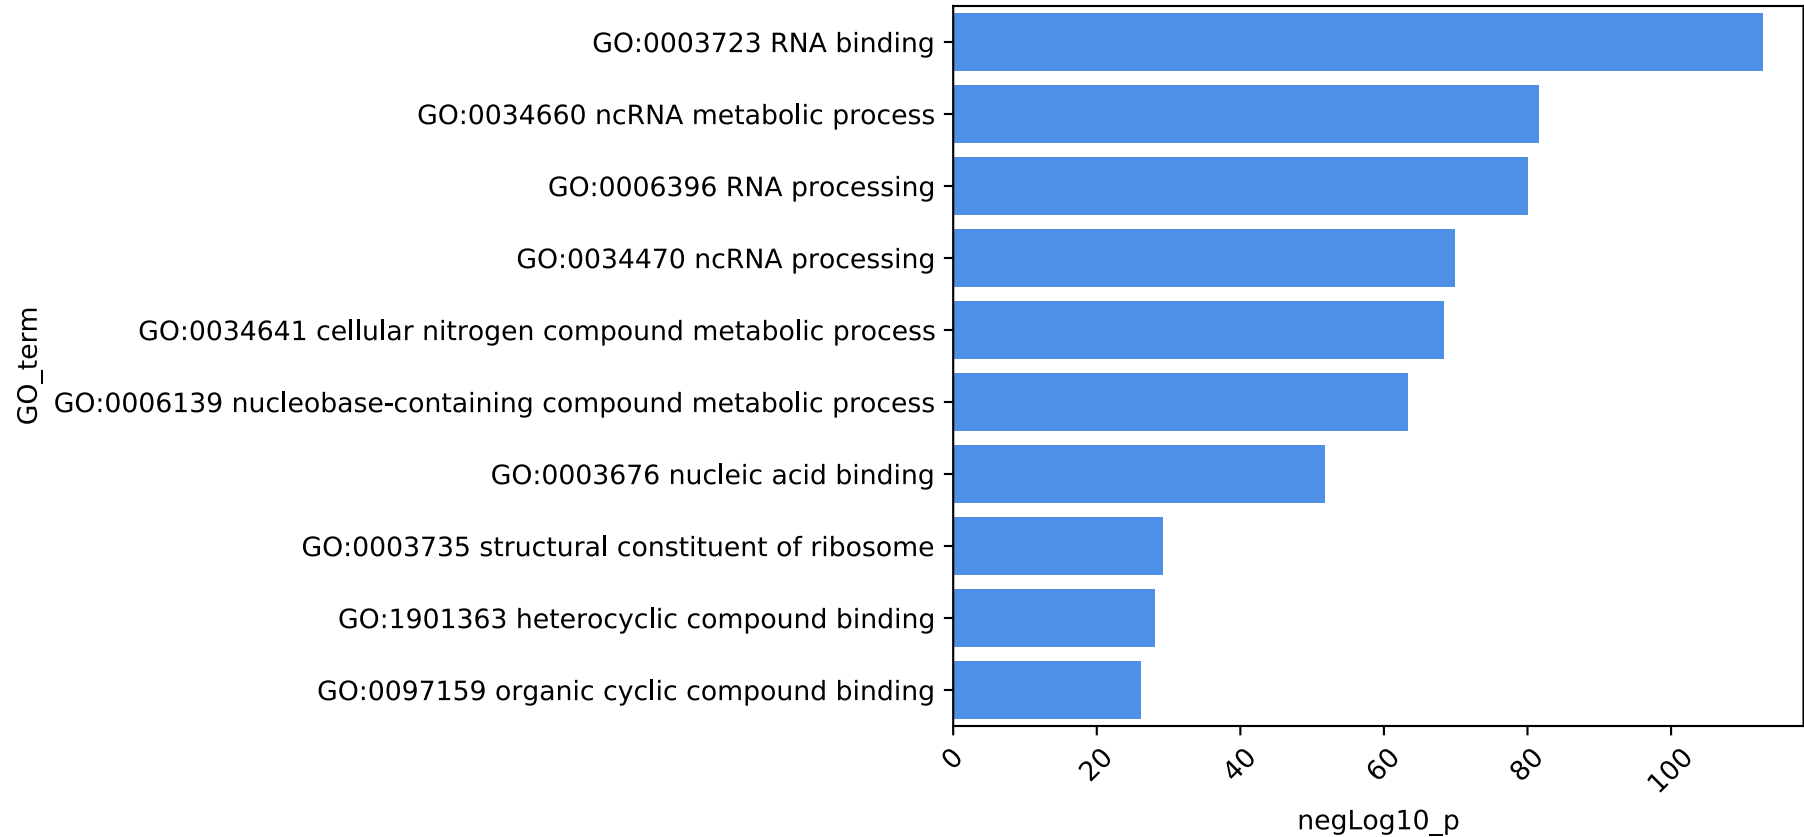

# PromF5

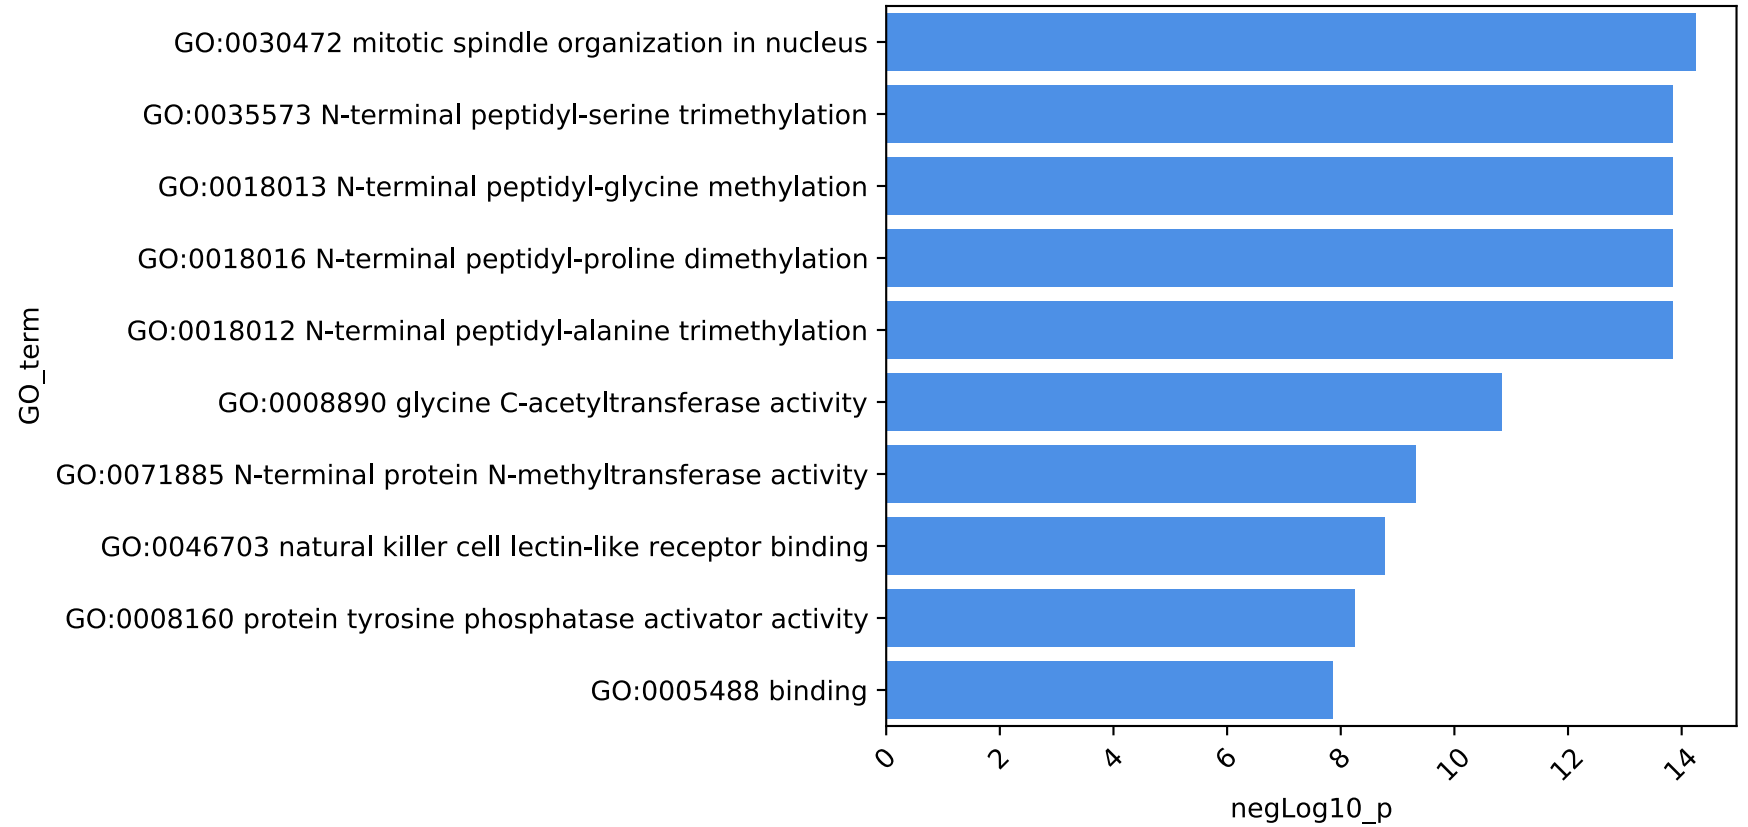

# PromF6

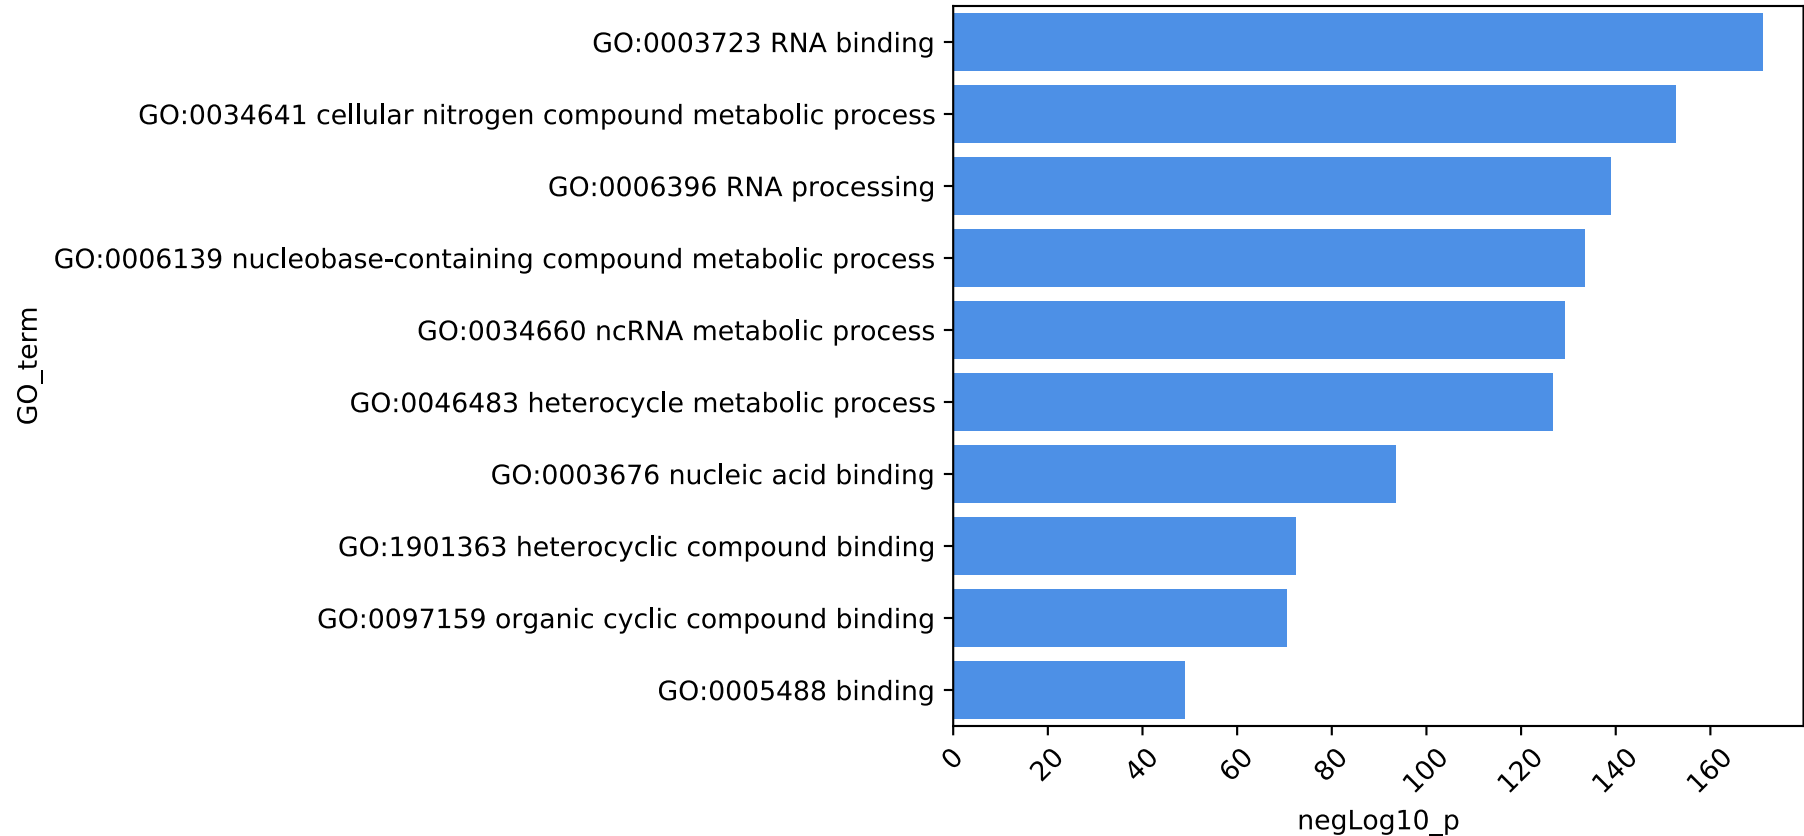

# PromF7

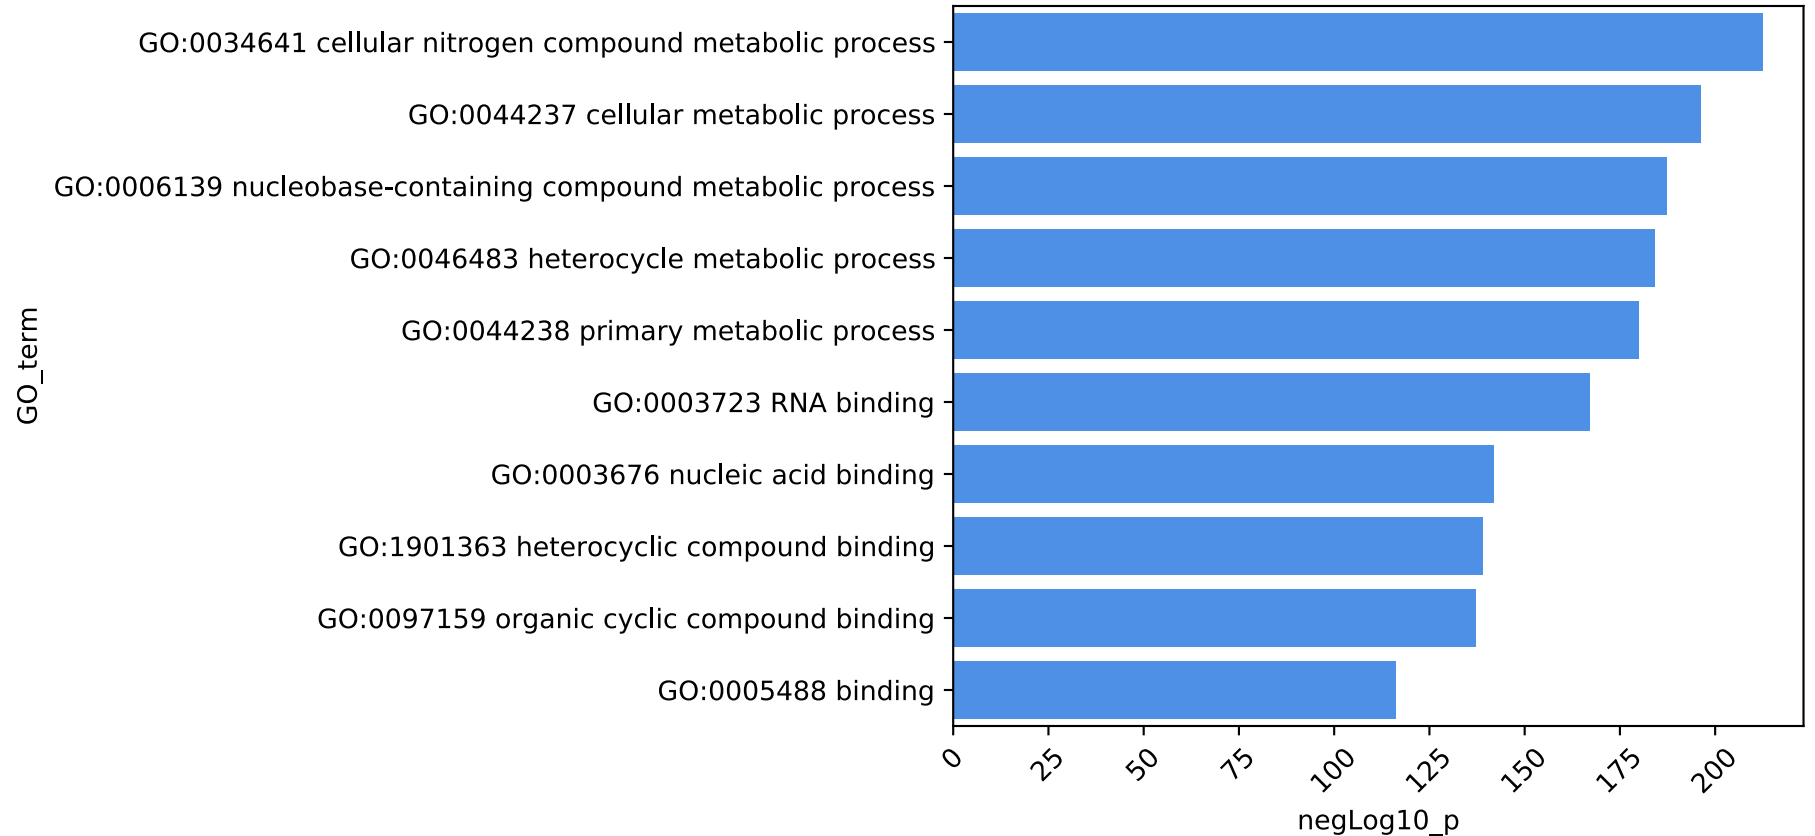

# Quies1

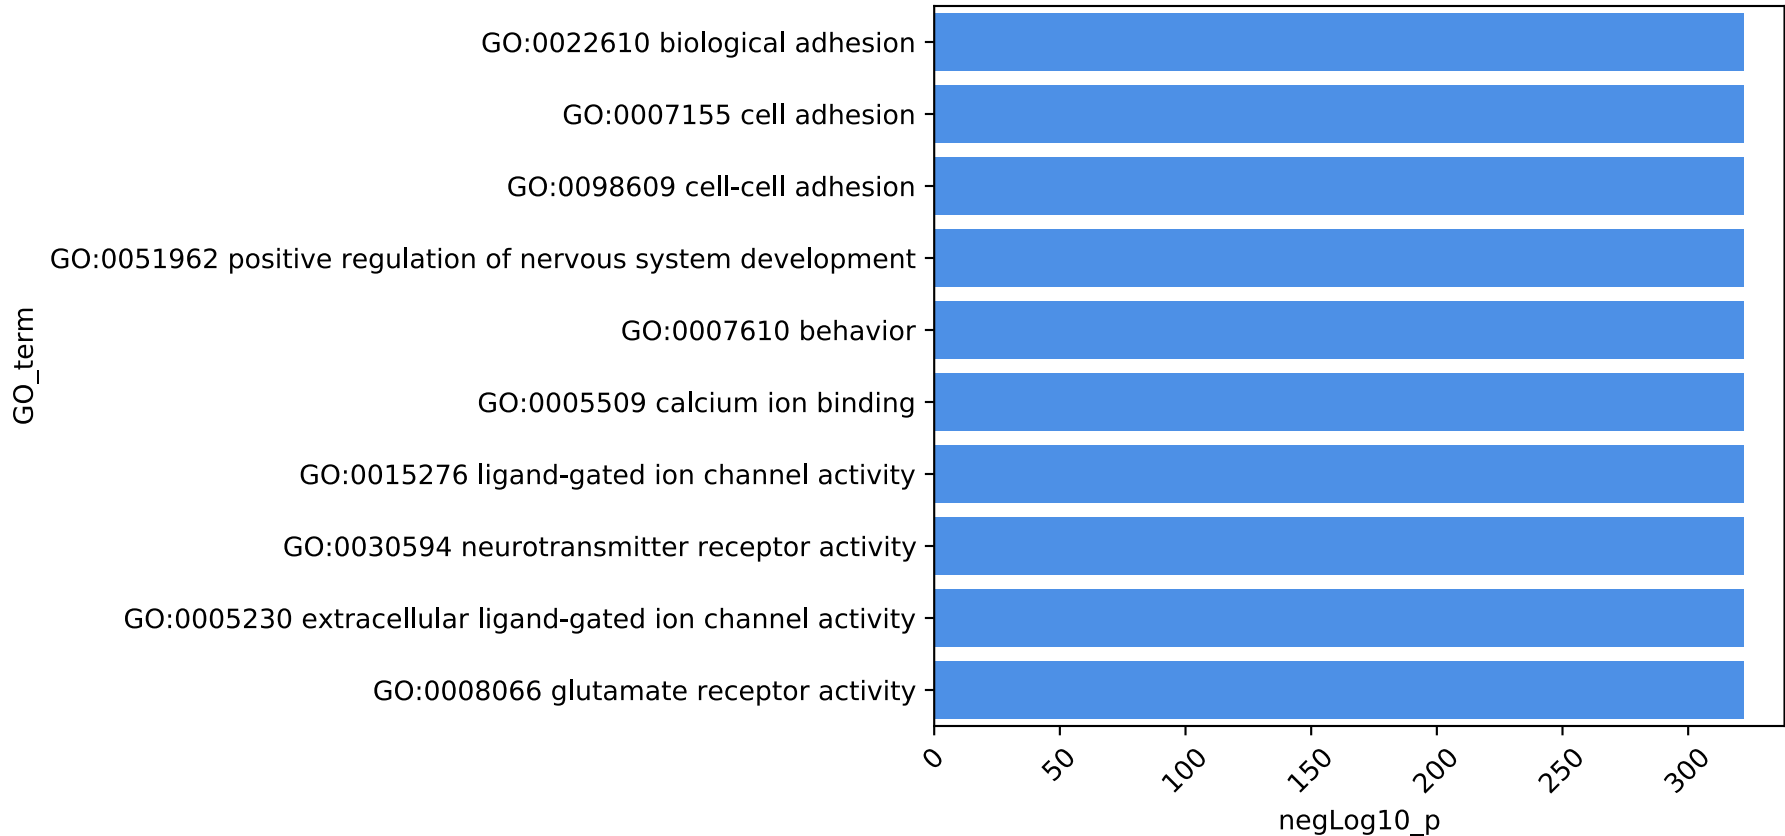

# Quies2

GO\_term

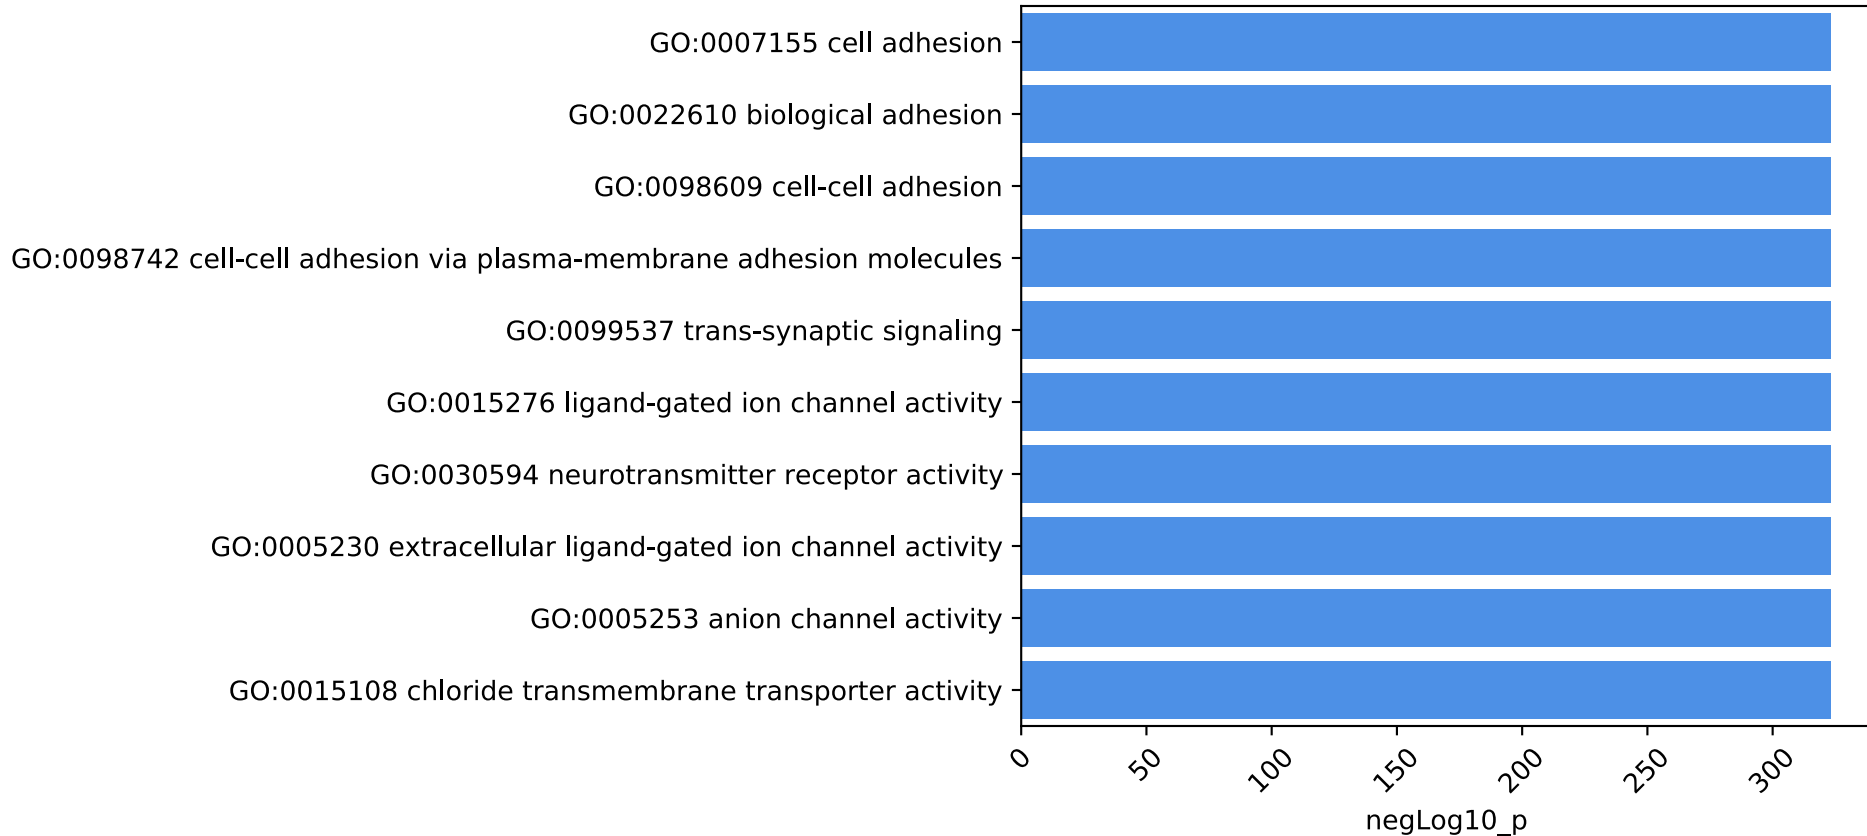

# Quies4

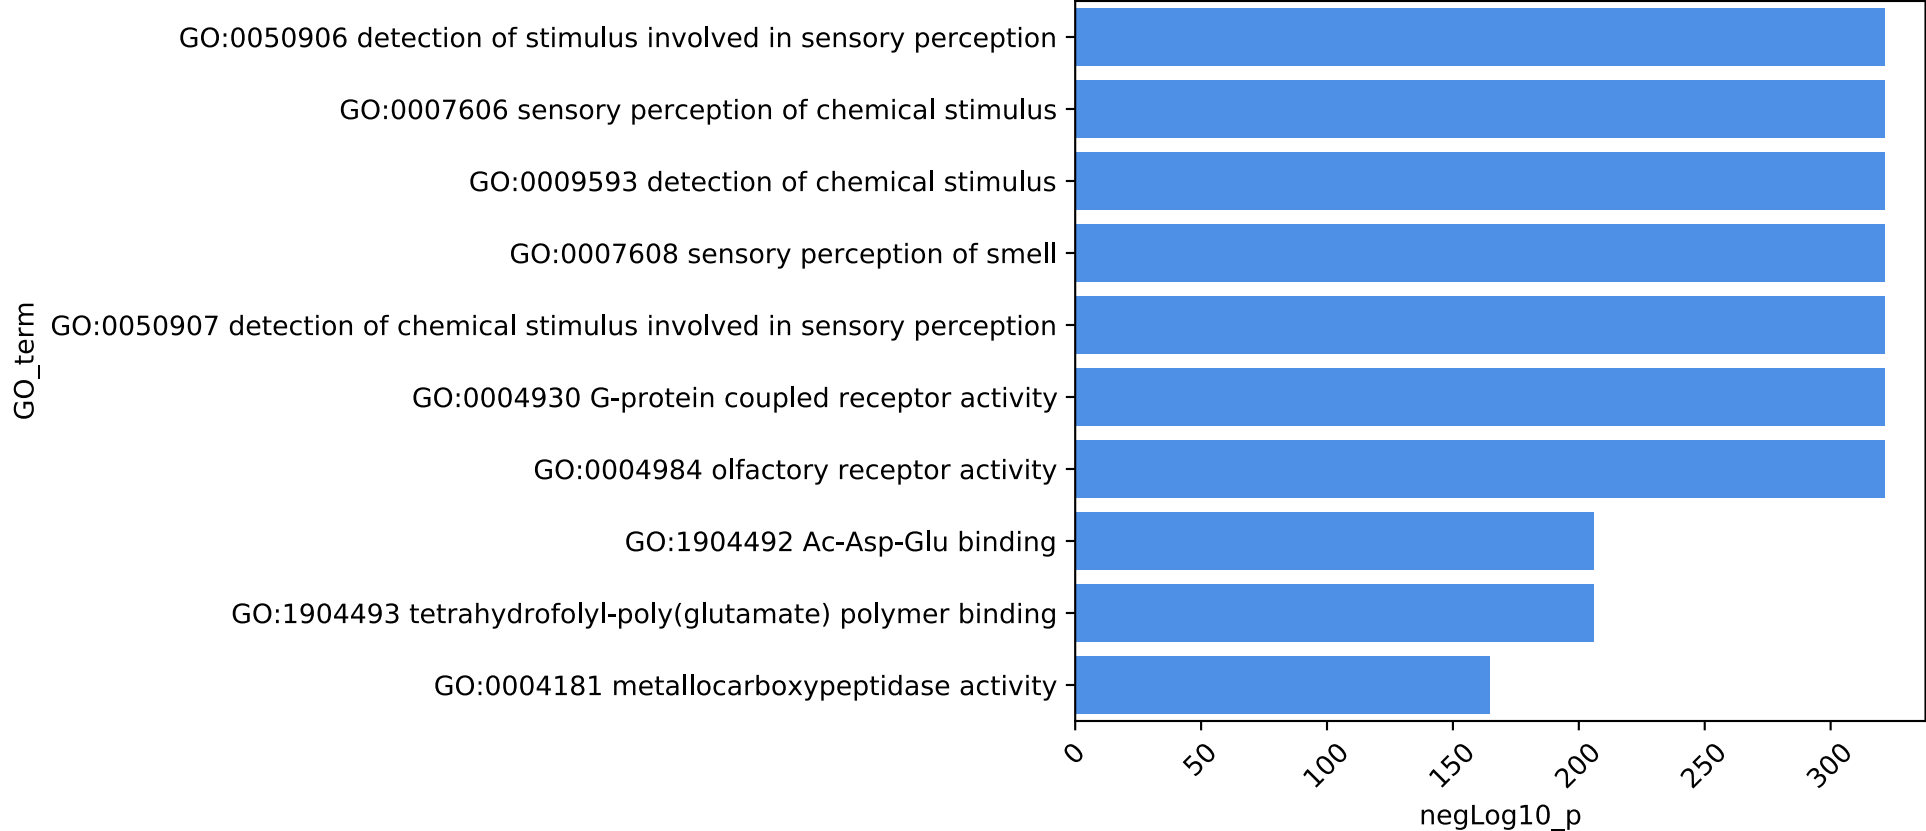

Quies5

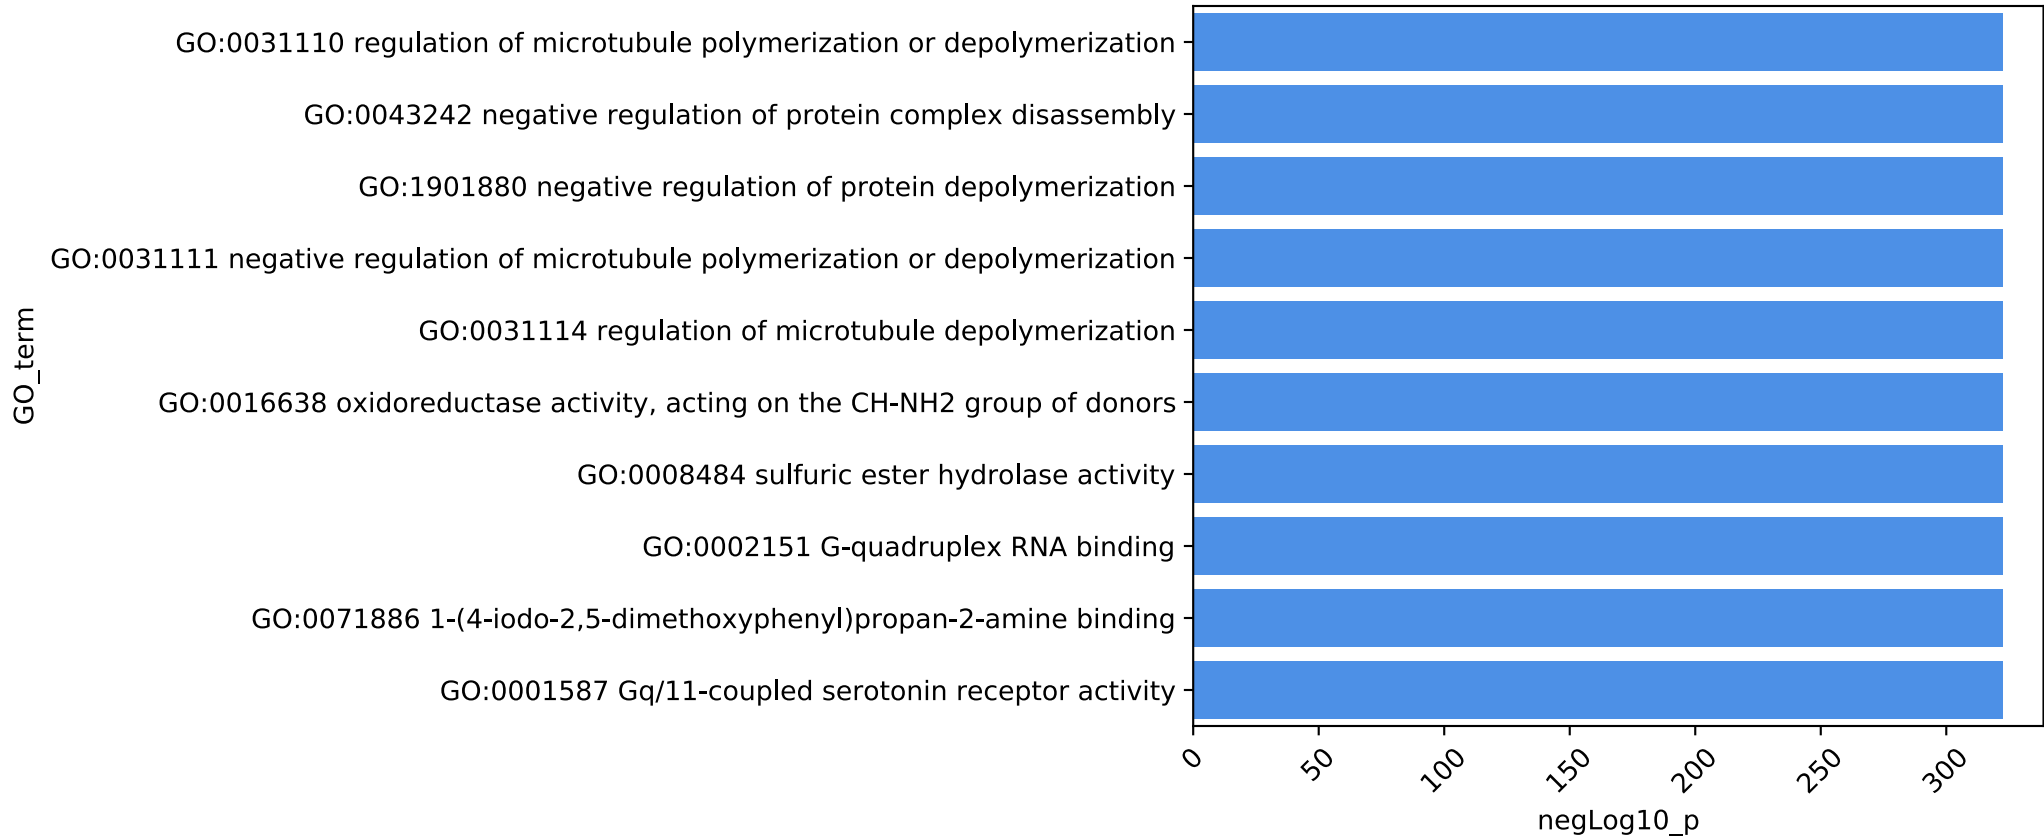



# ReprPC1

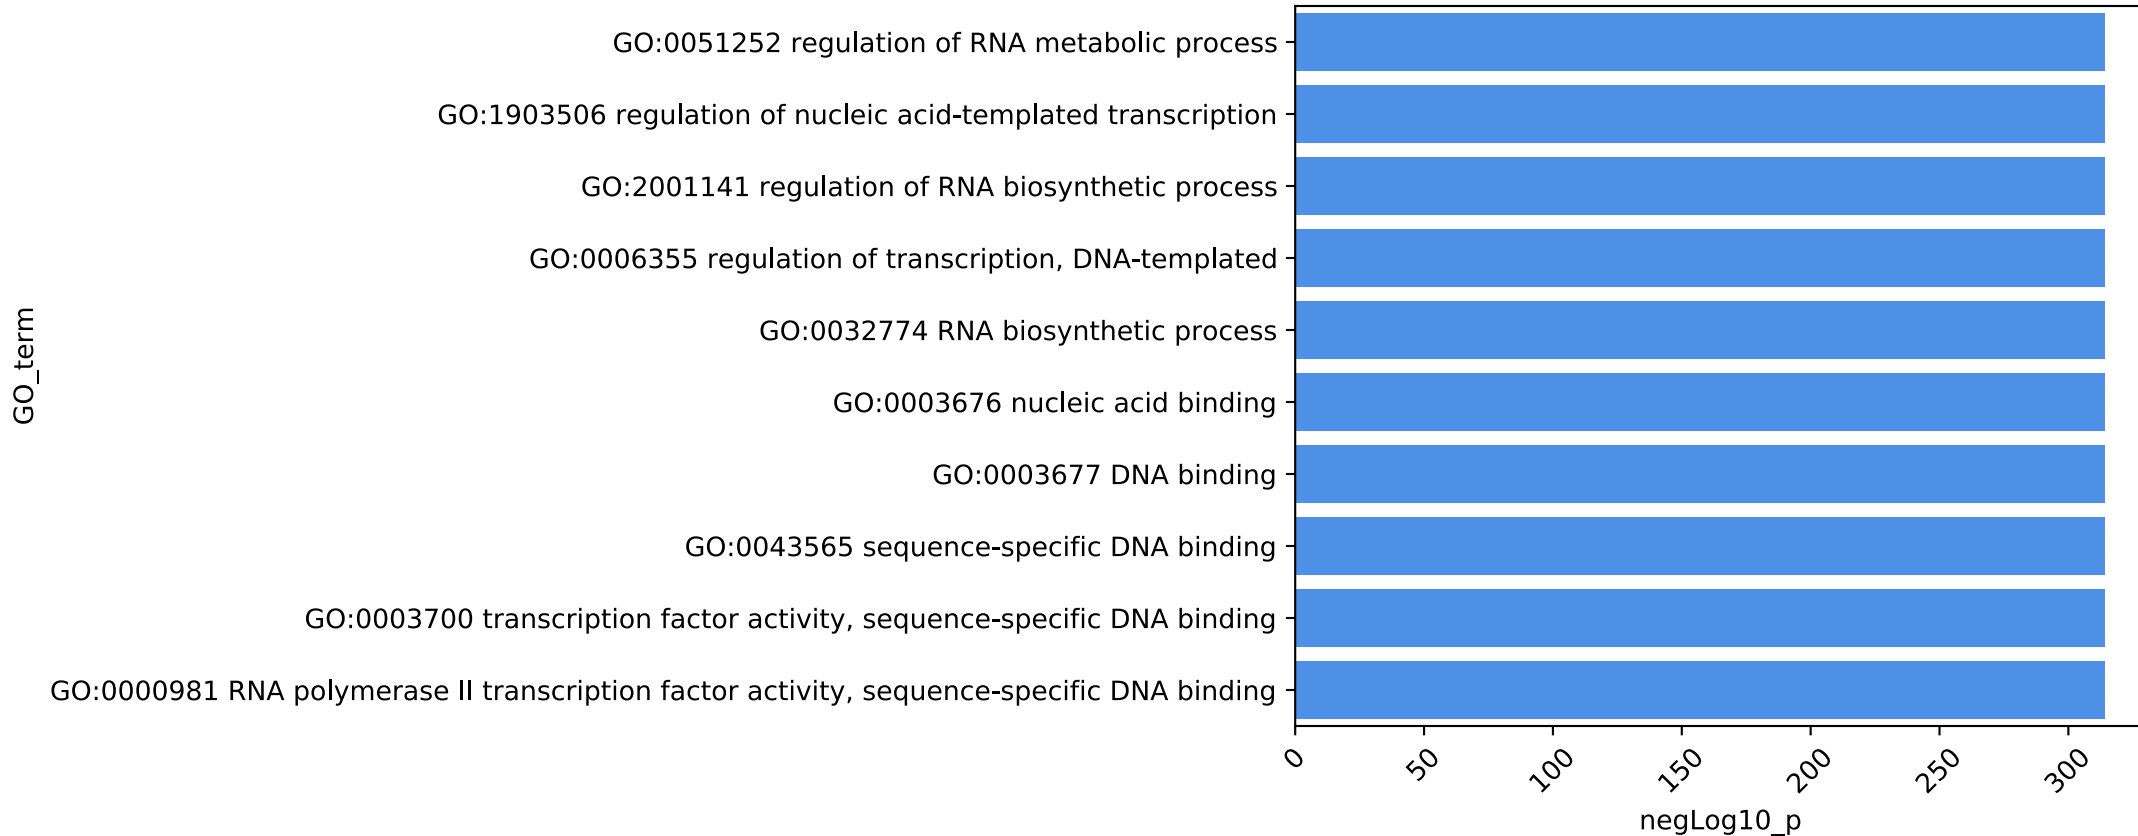

# ReprPC2

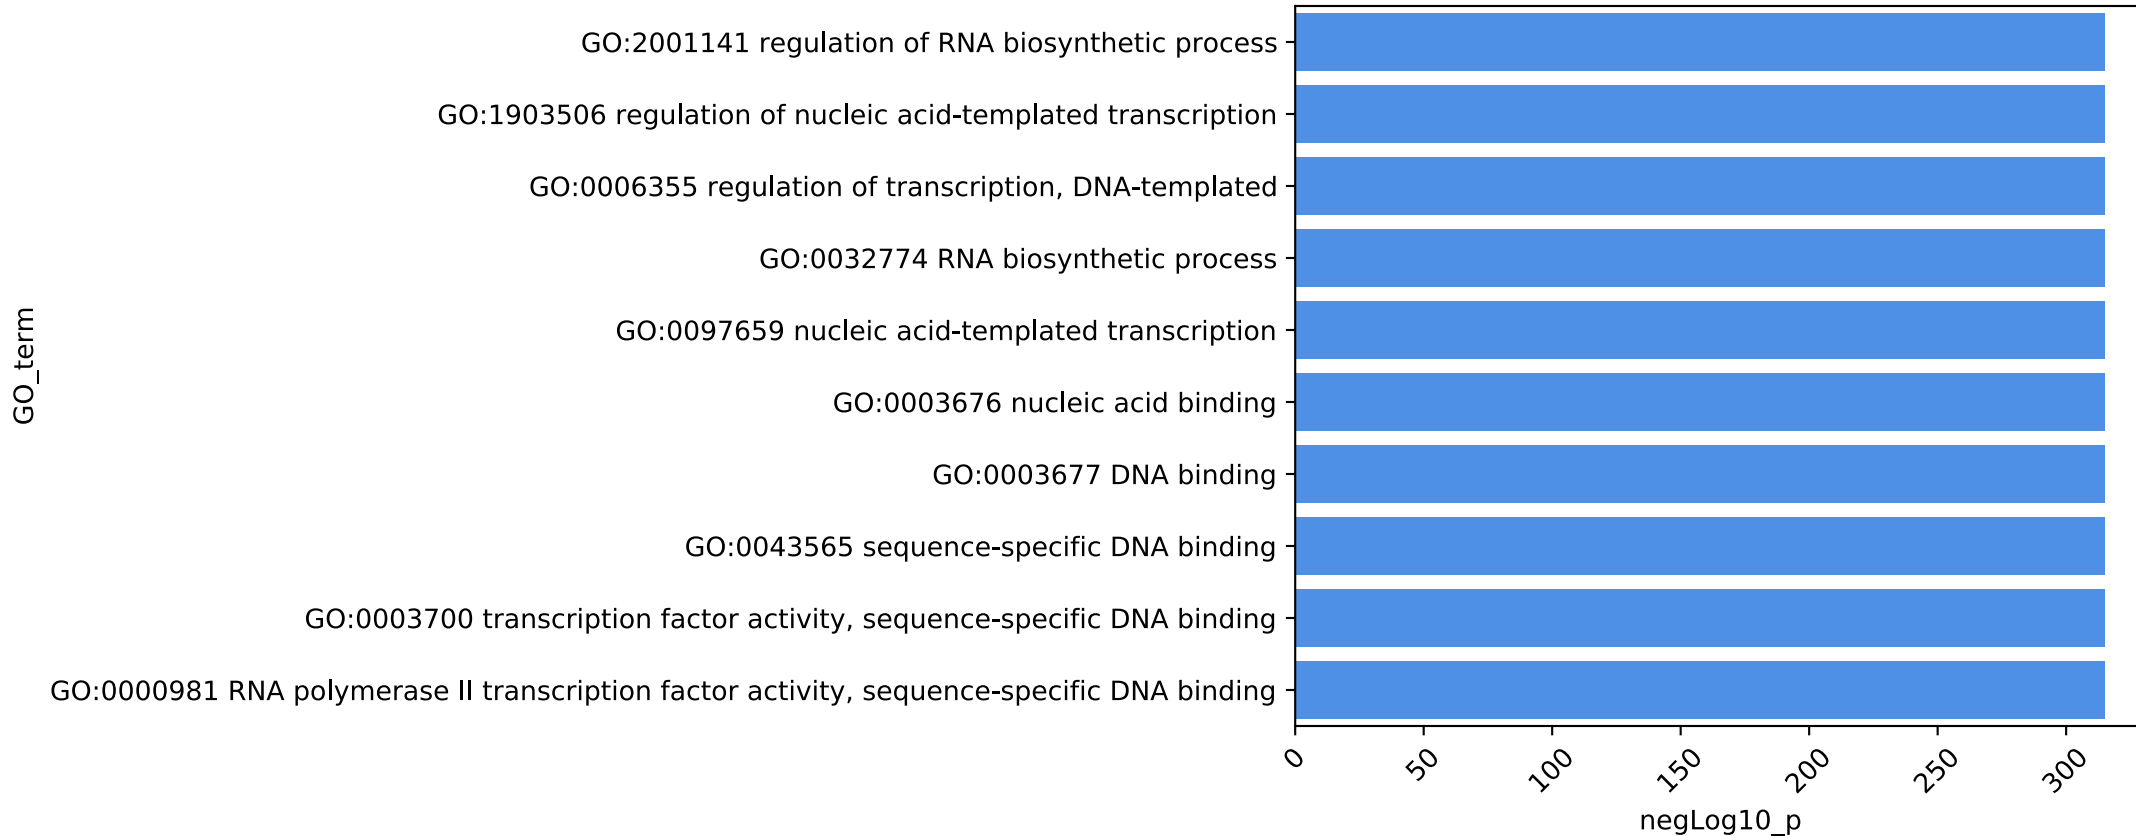

# ReprPC3

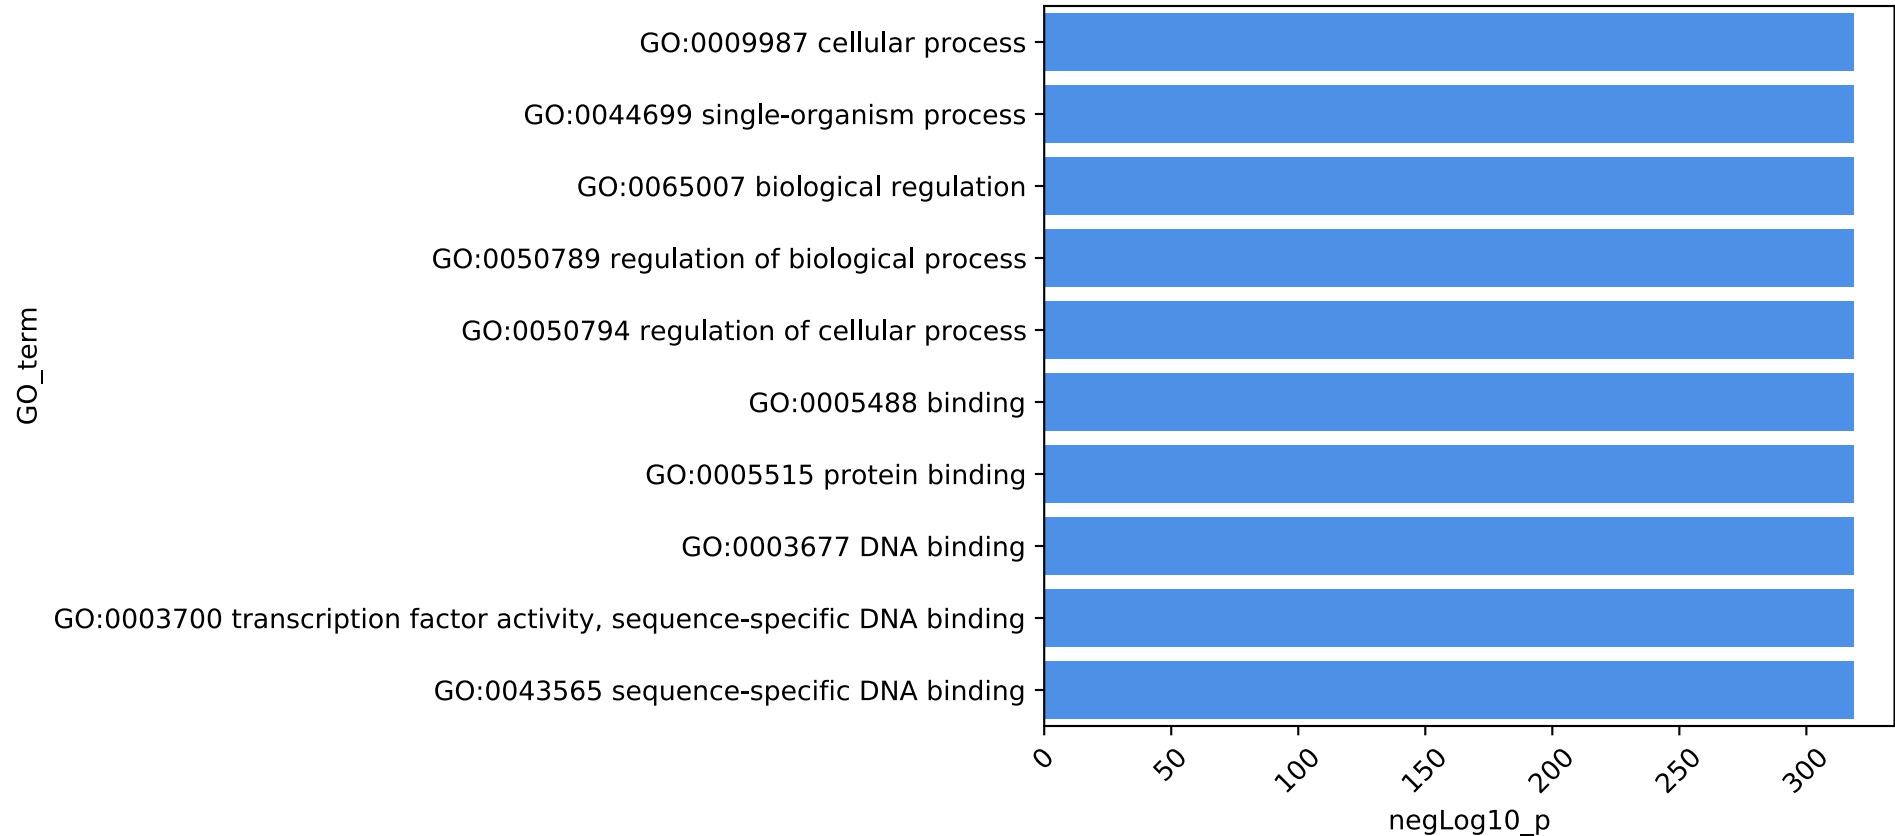

# ReprPC4

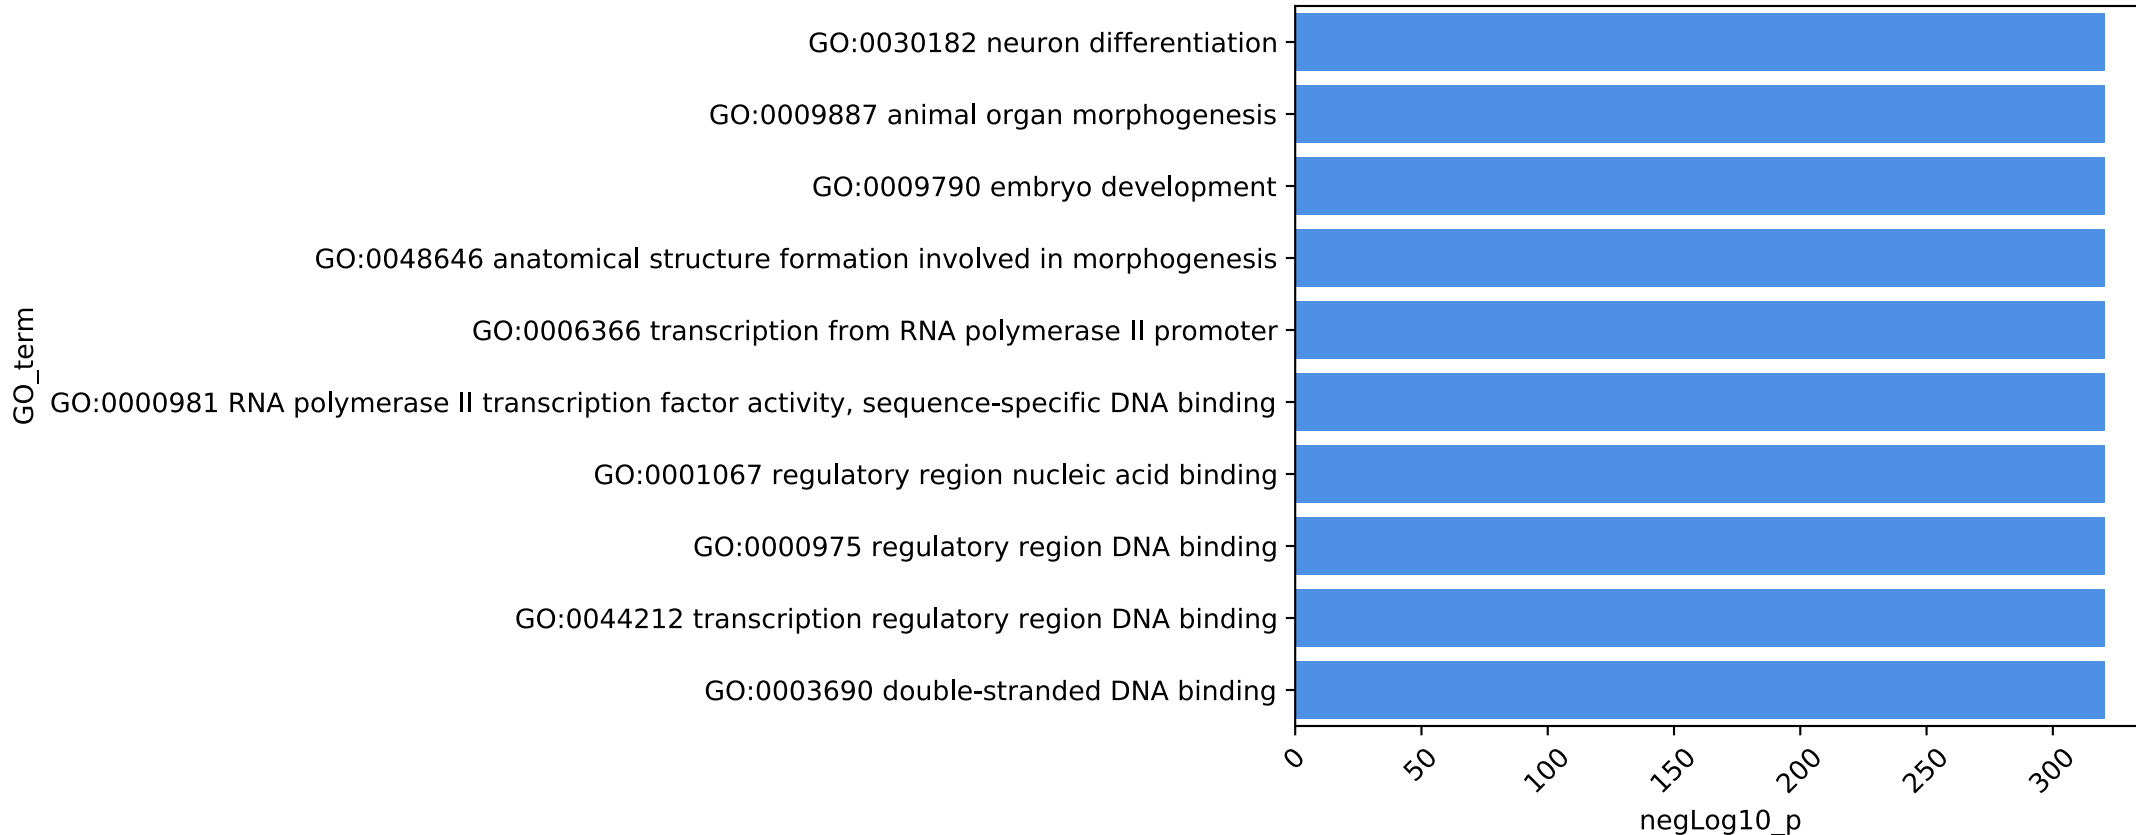

# ReprPC5

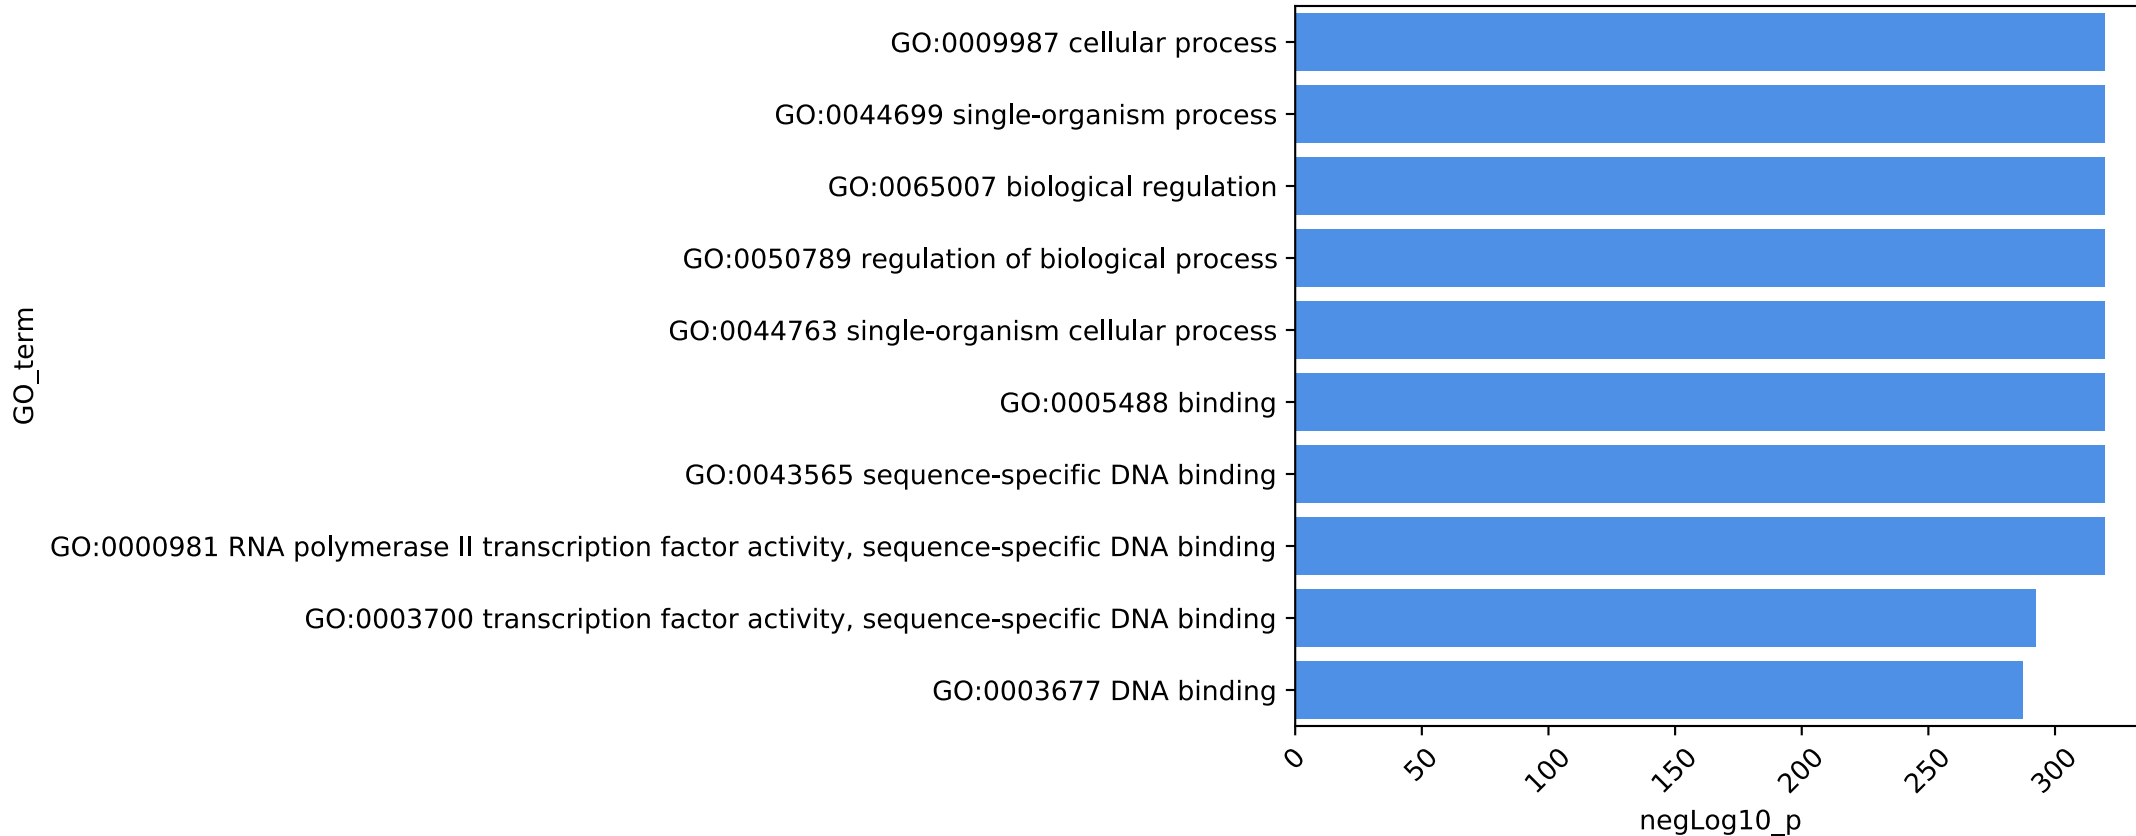

# ReprPC6

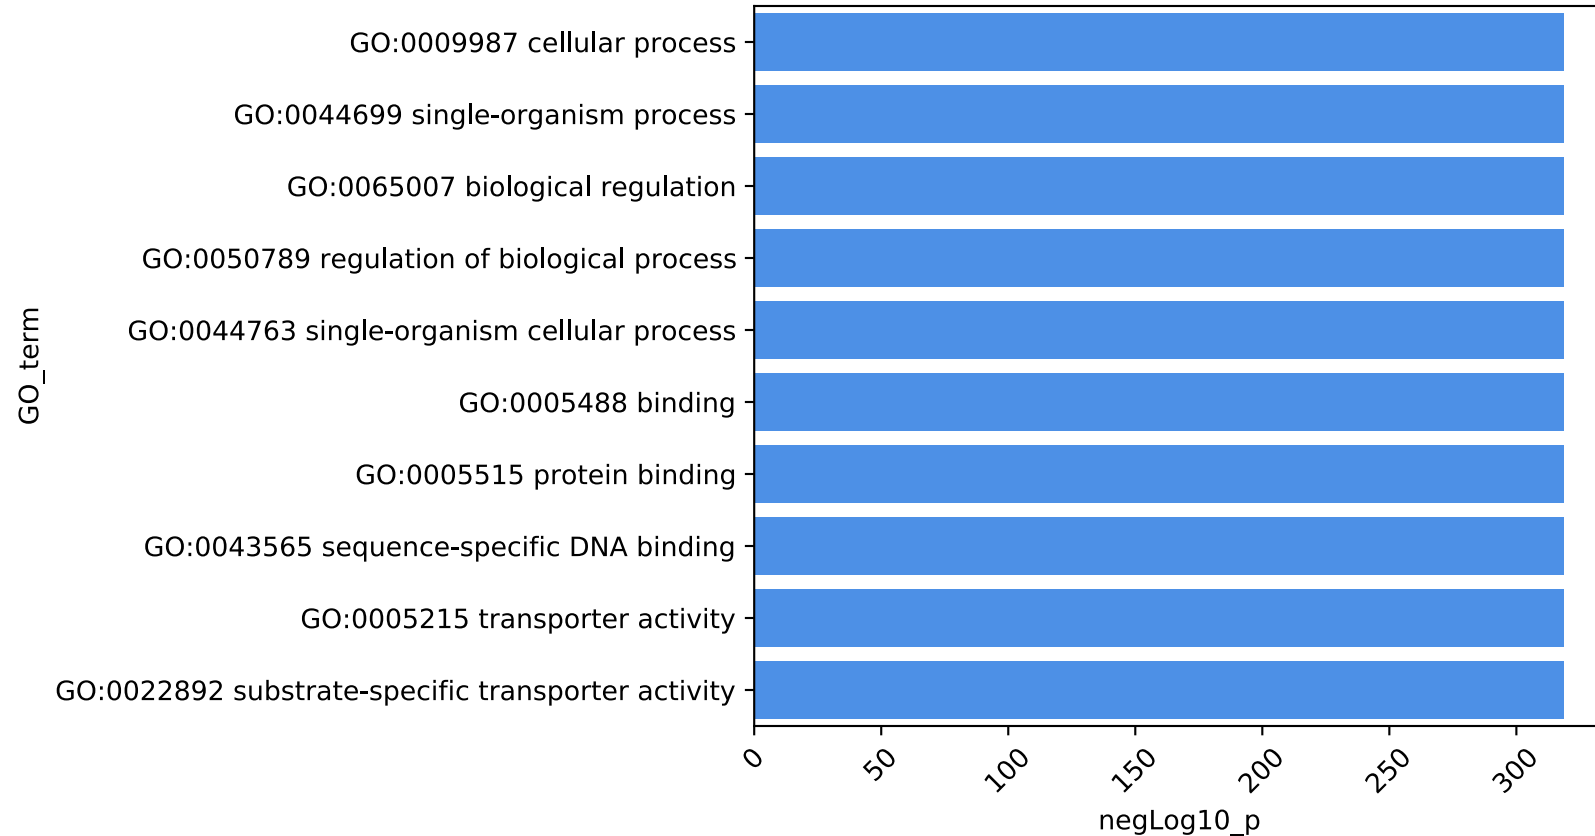

# ReprPC7

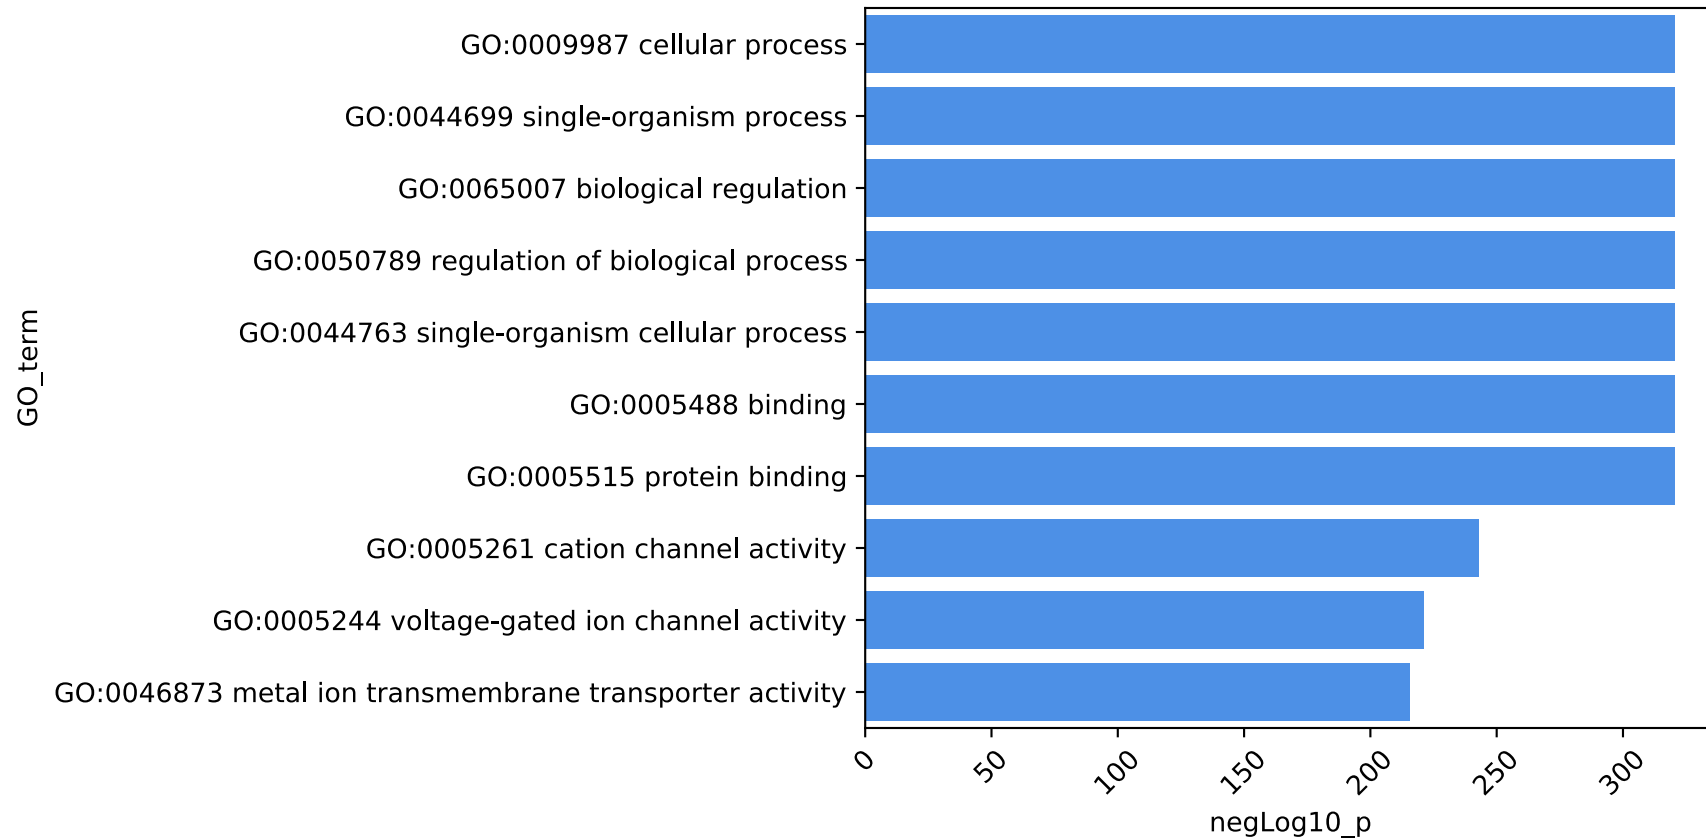

# ReprPC8

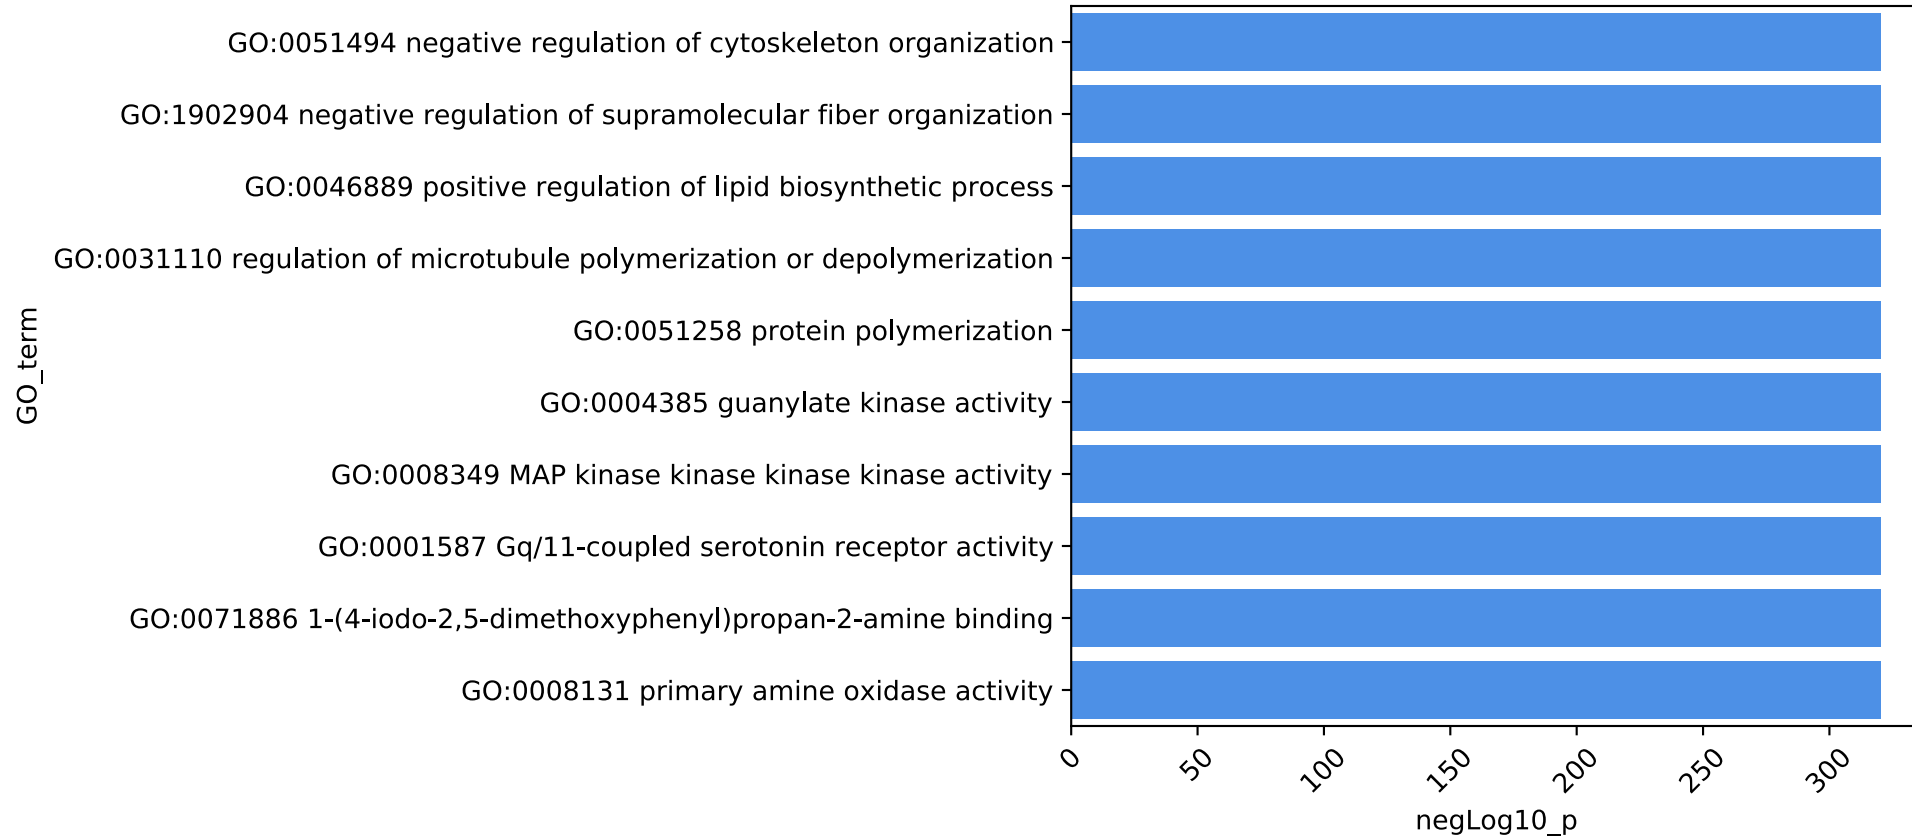



# ReprPC9

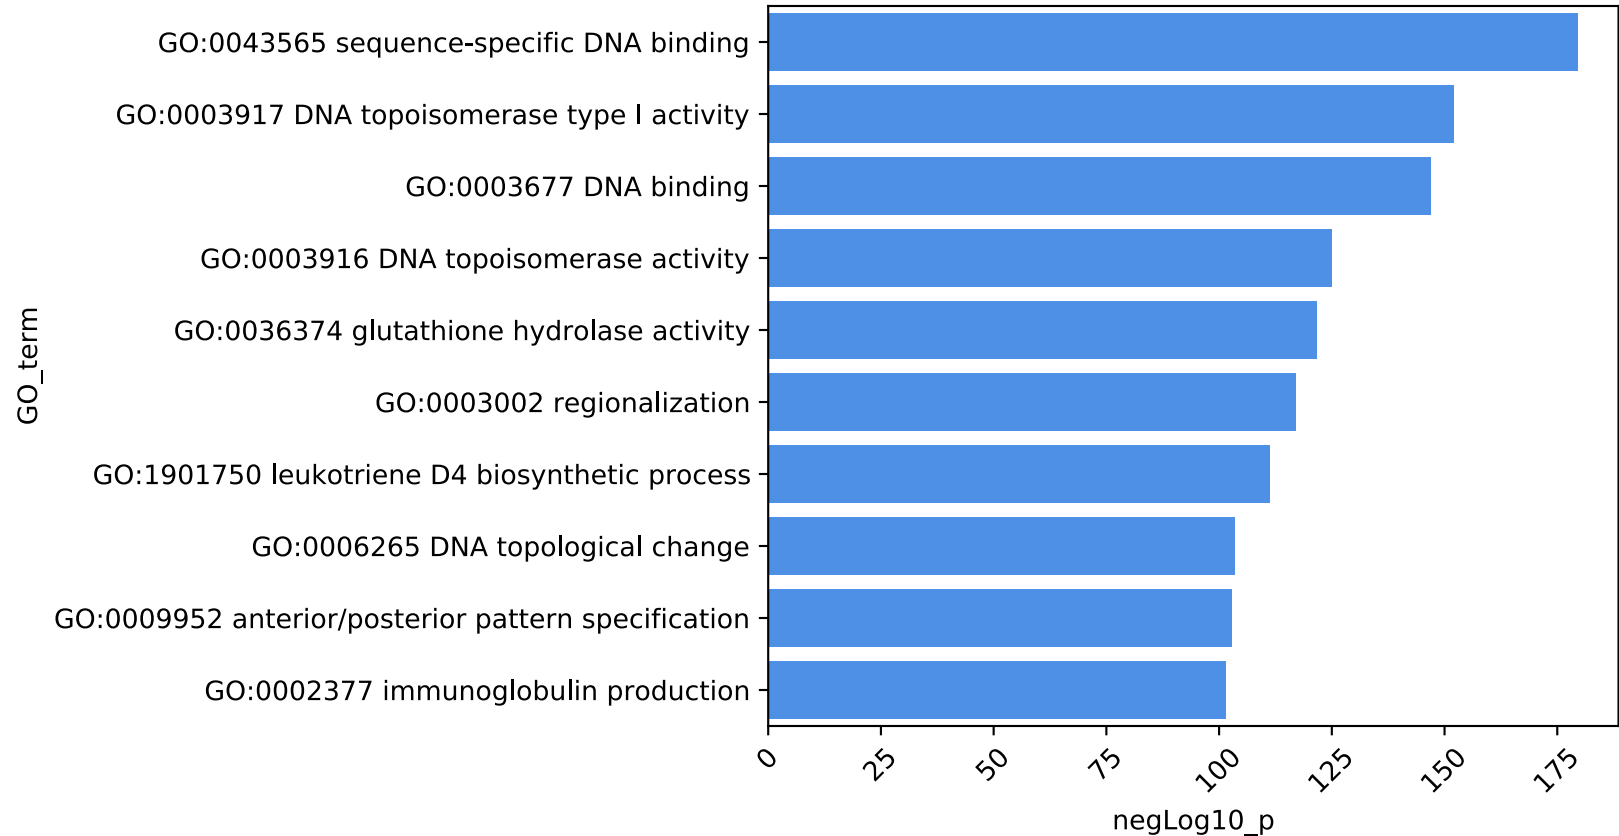

# TSS1

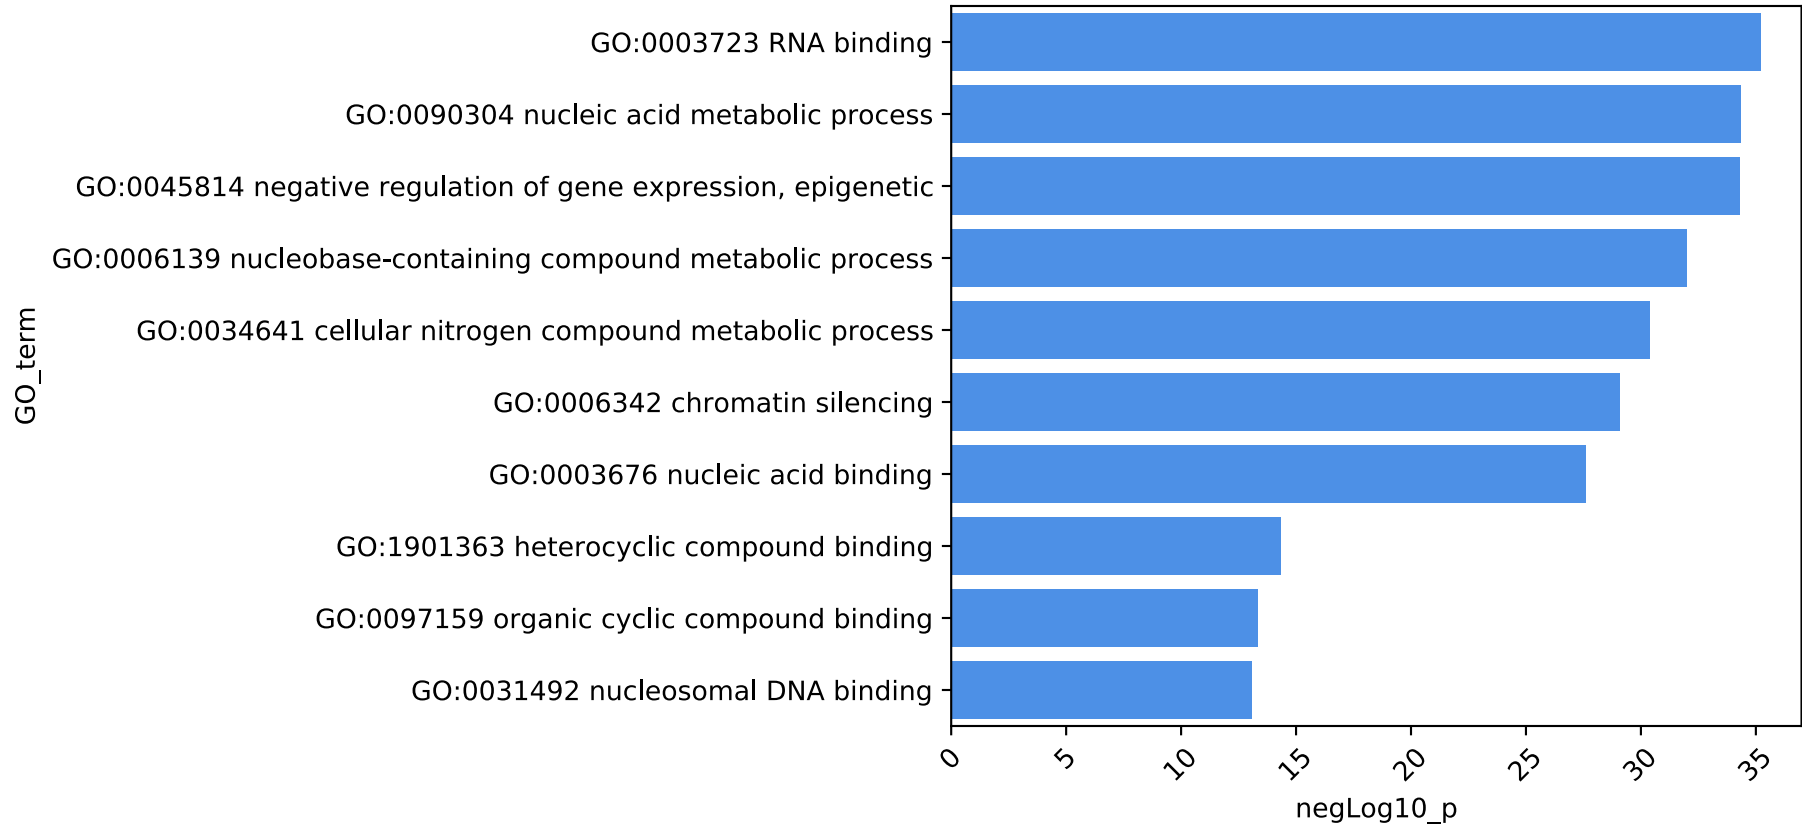

## TSS2

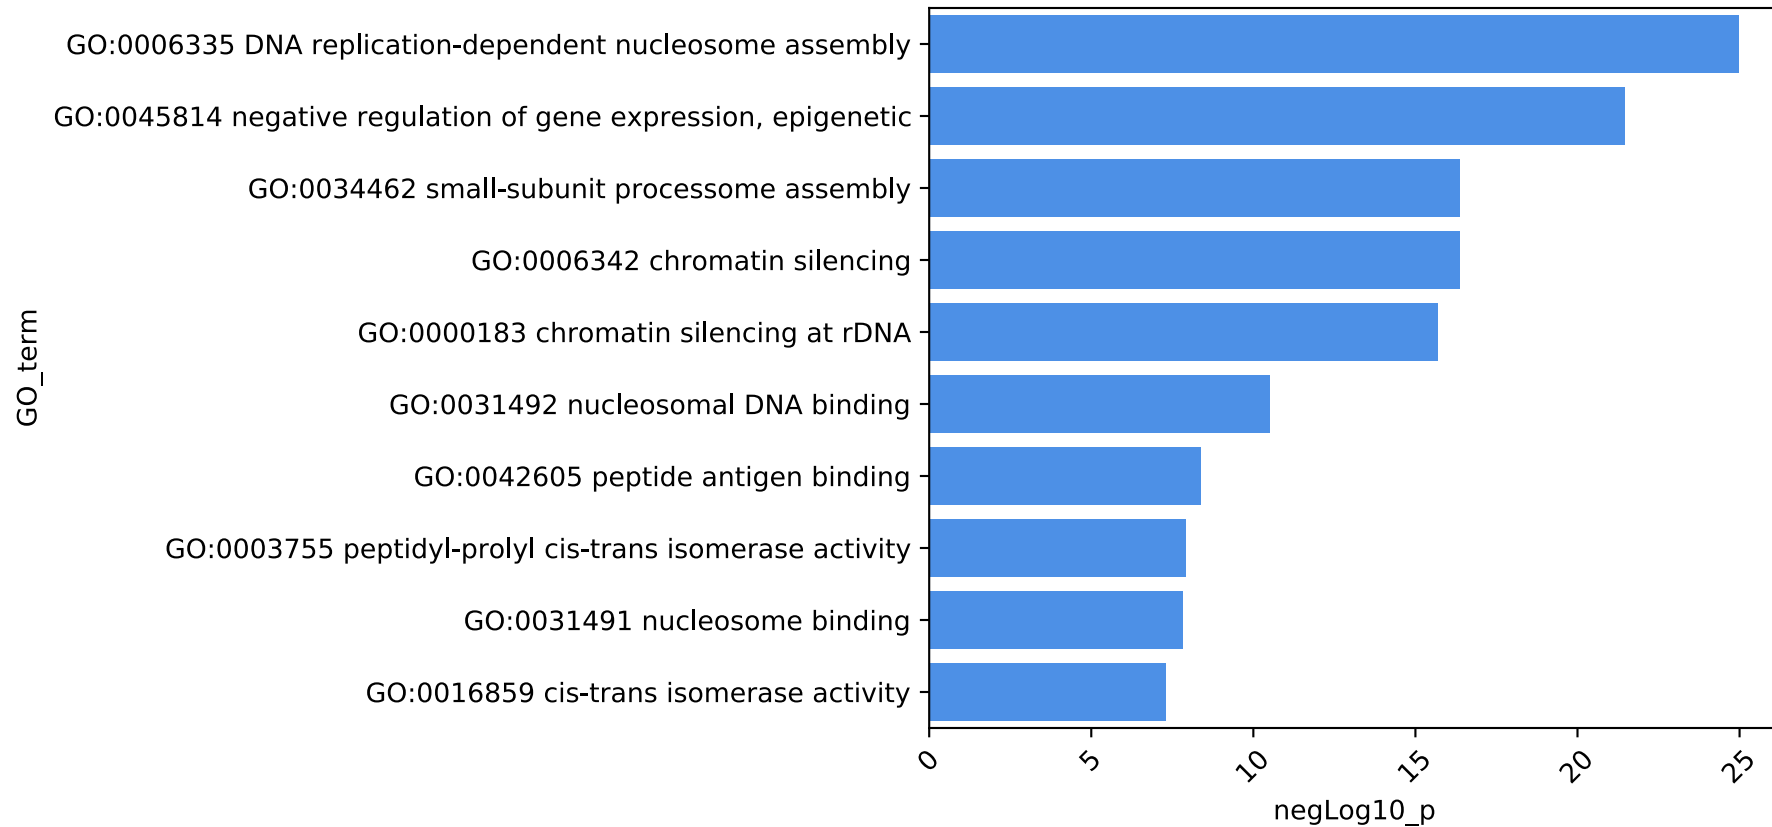

Tx1

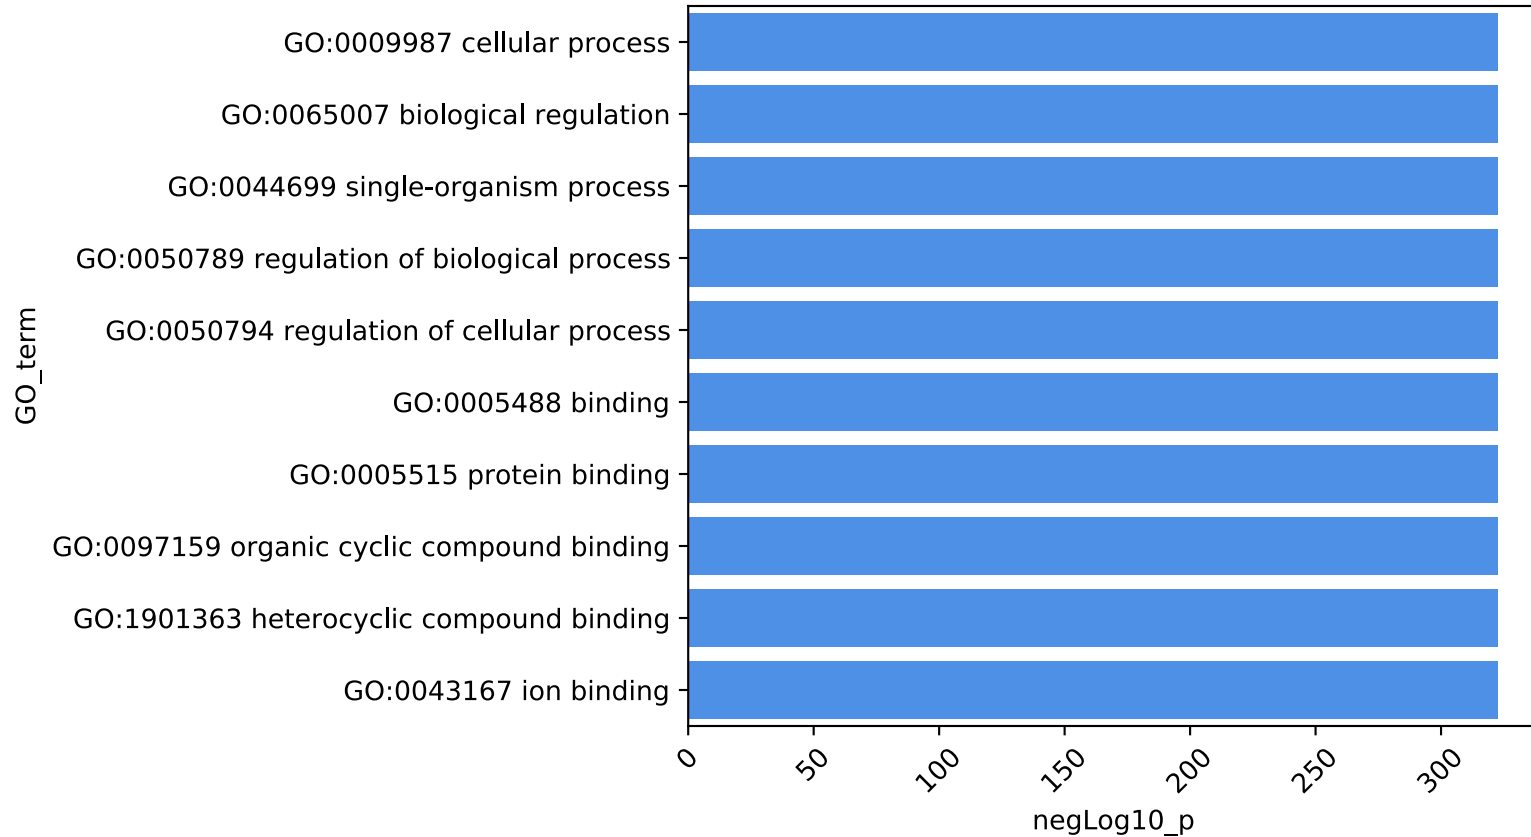

Tx2

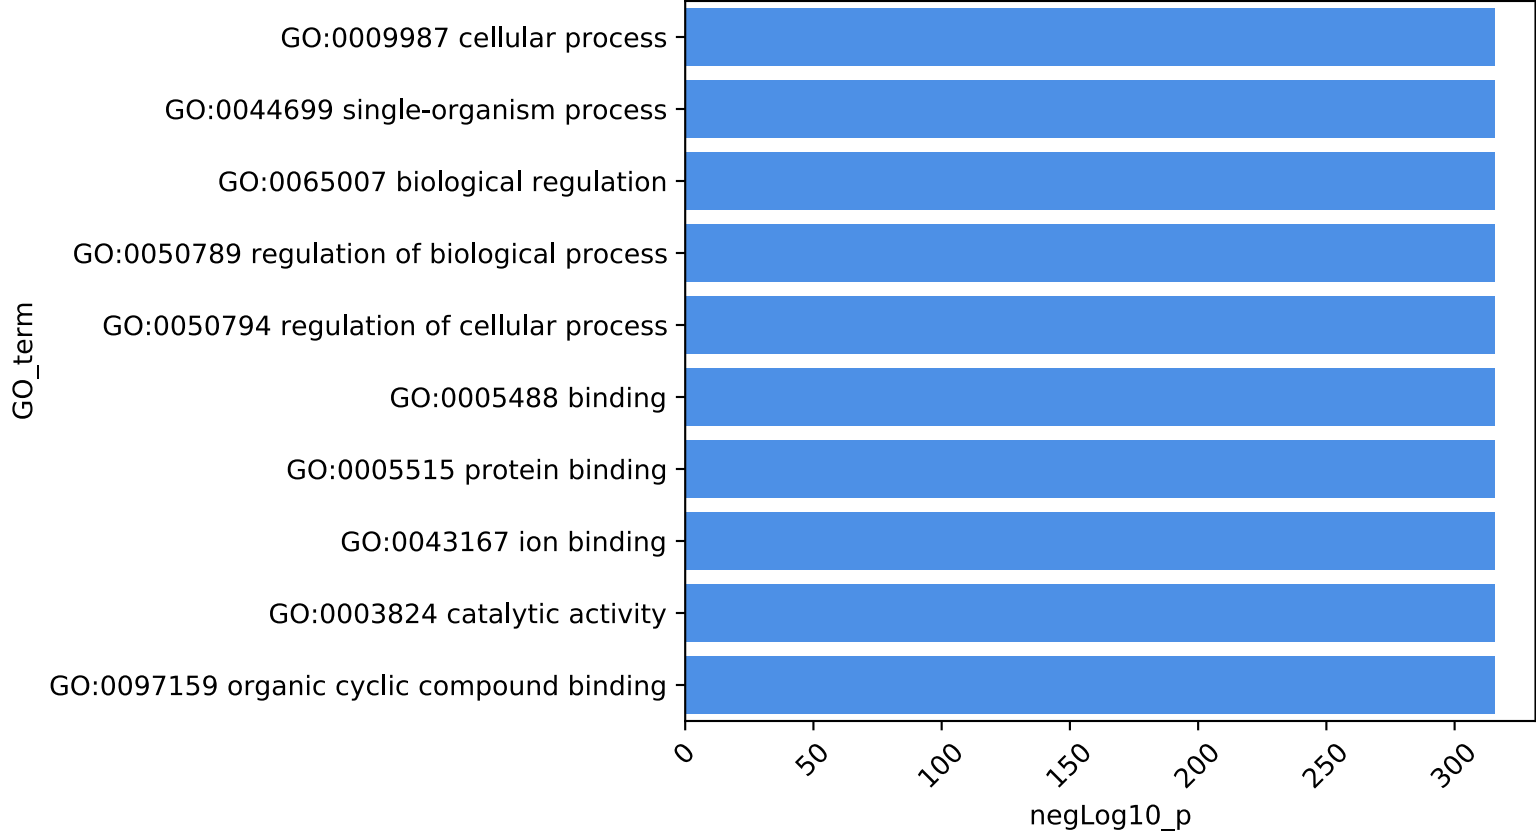

Tx3

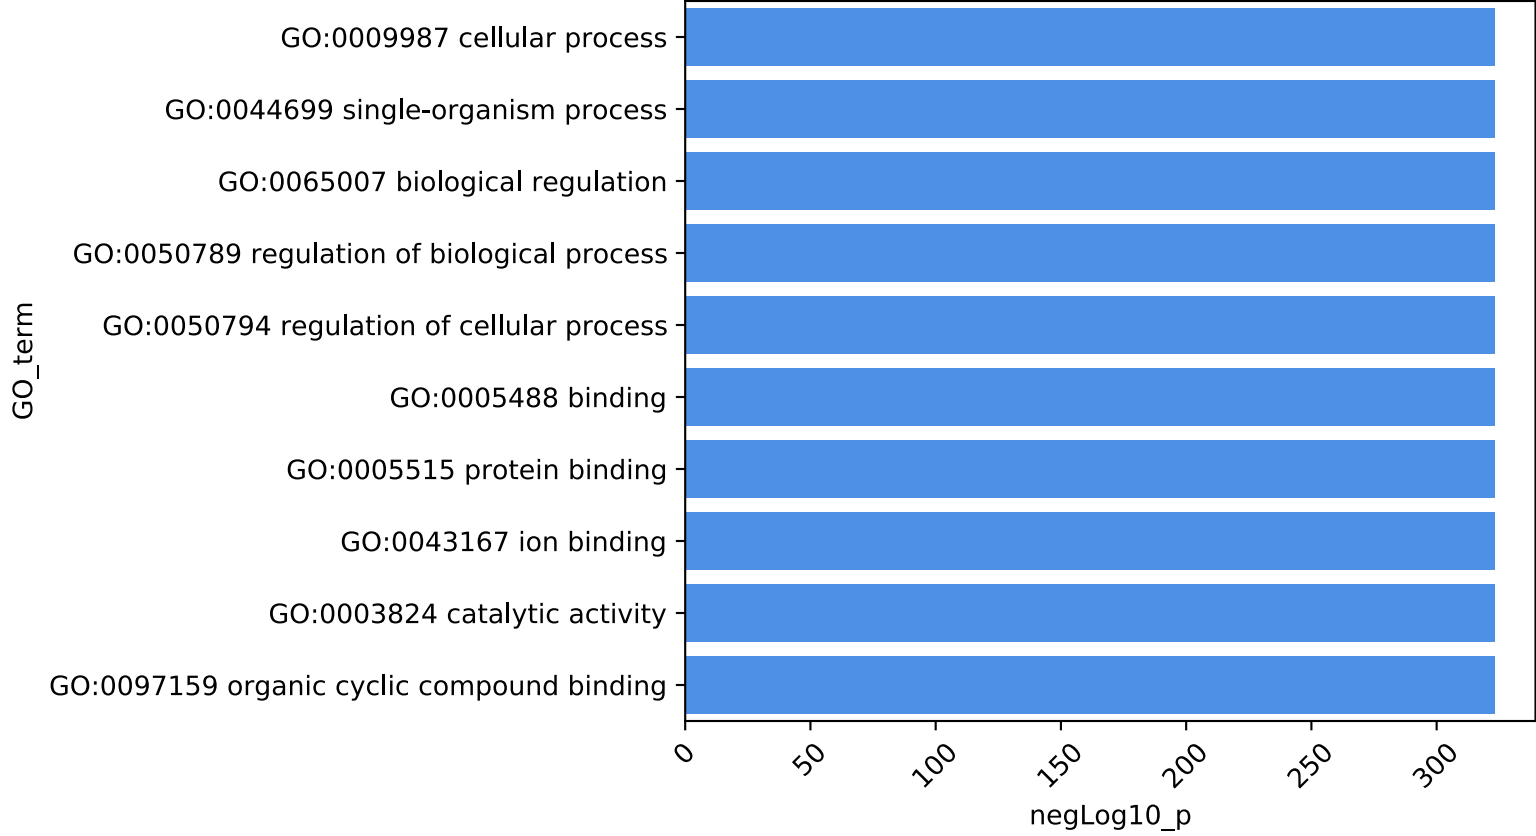

Tx4

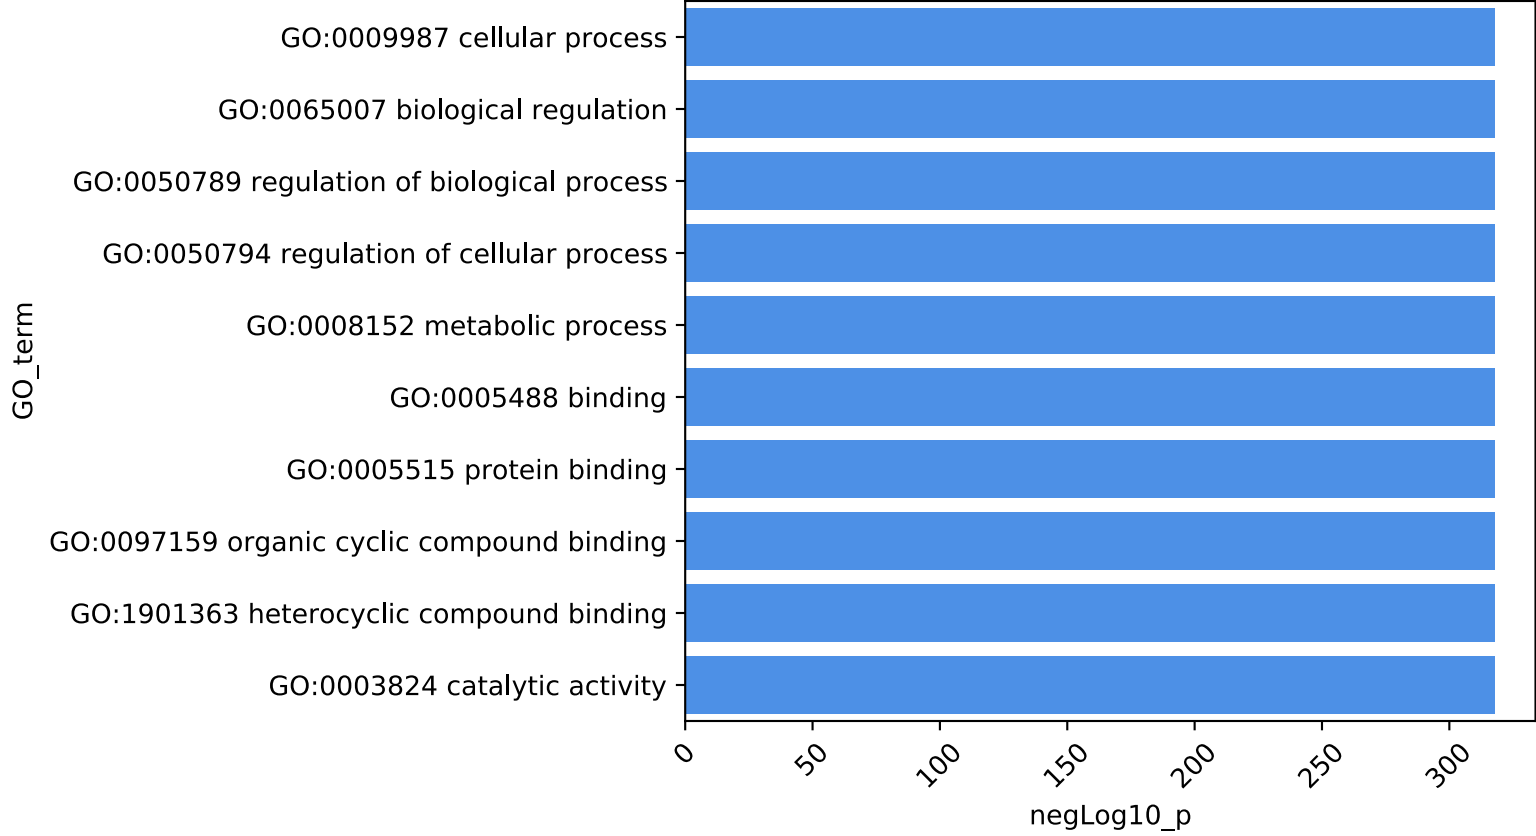

Tx5

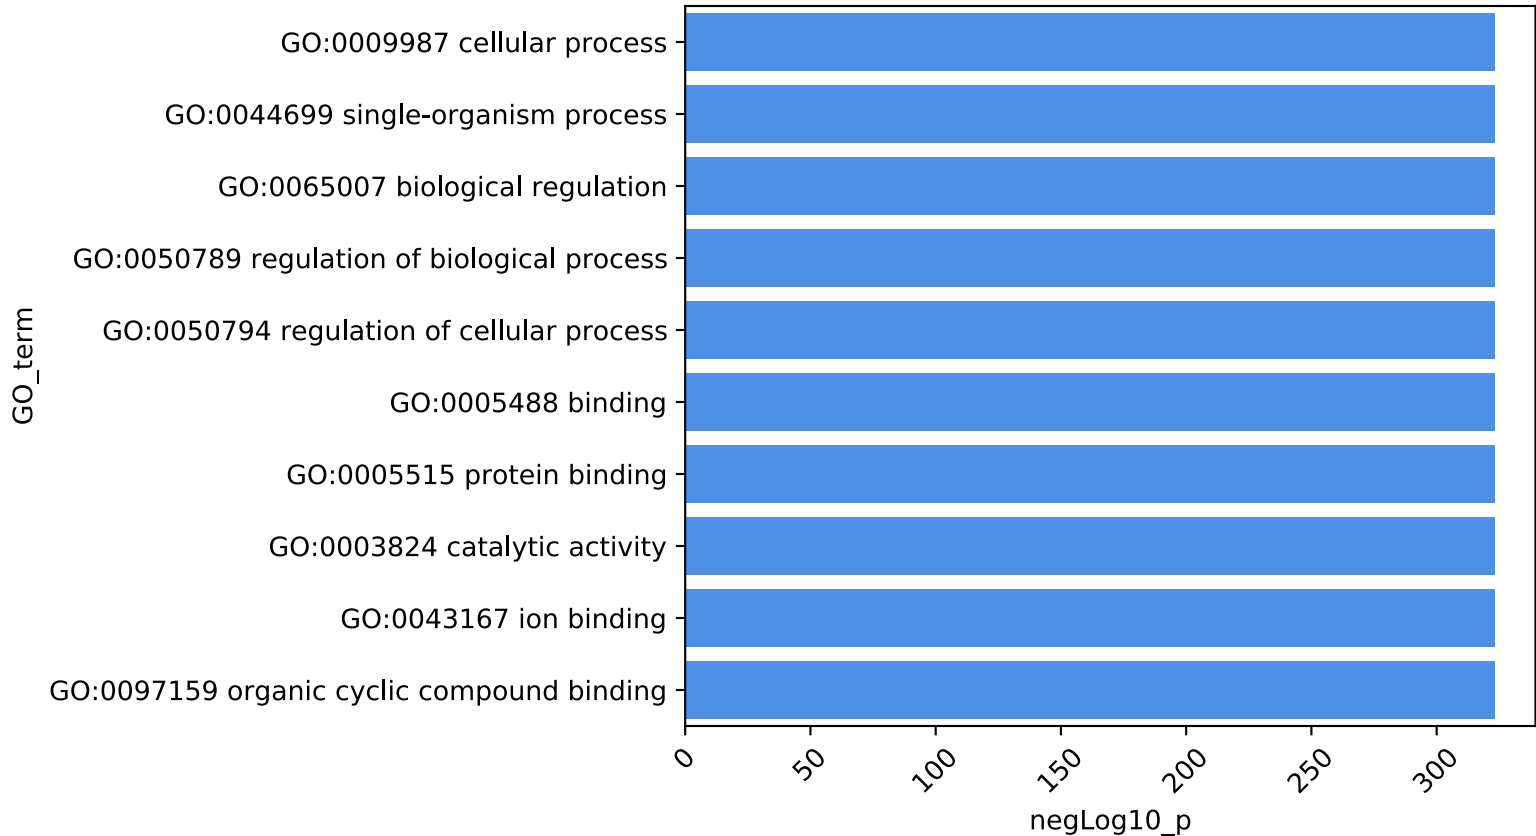



Tx6

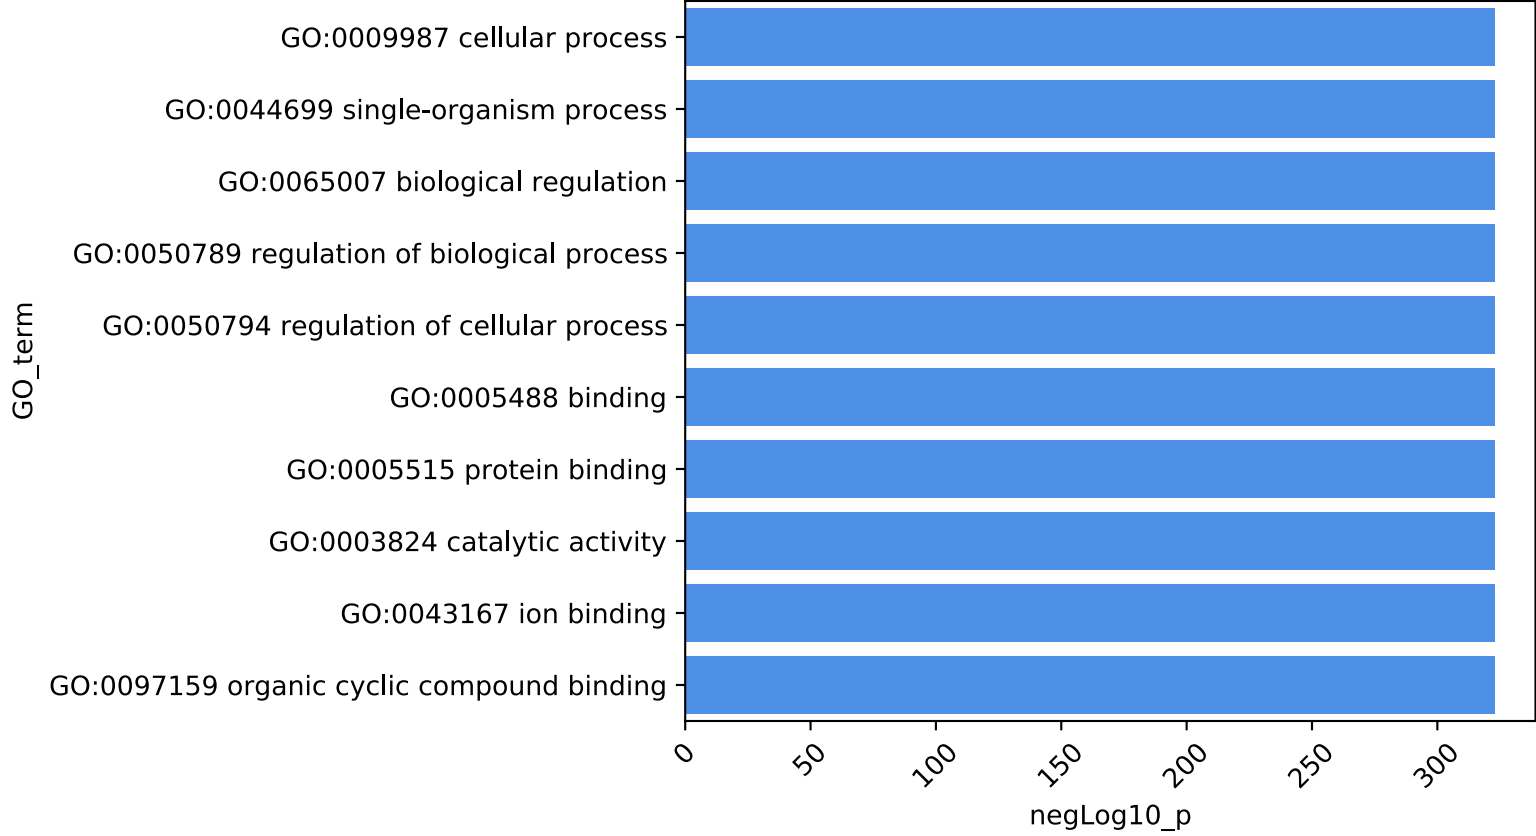

Tx7

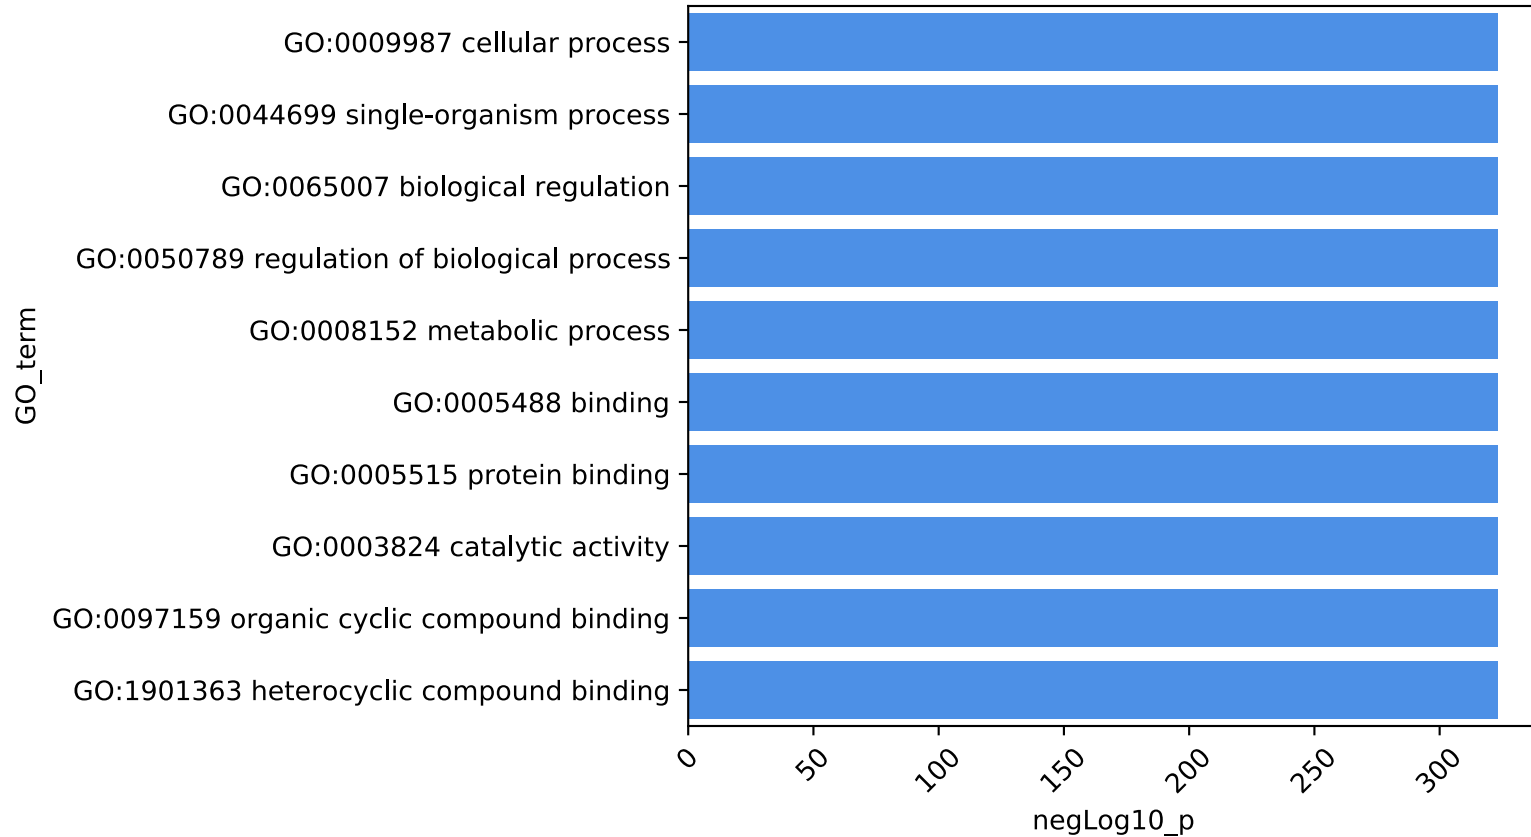

Tx8

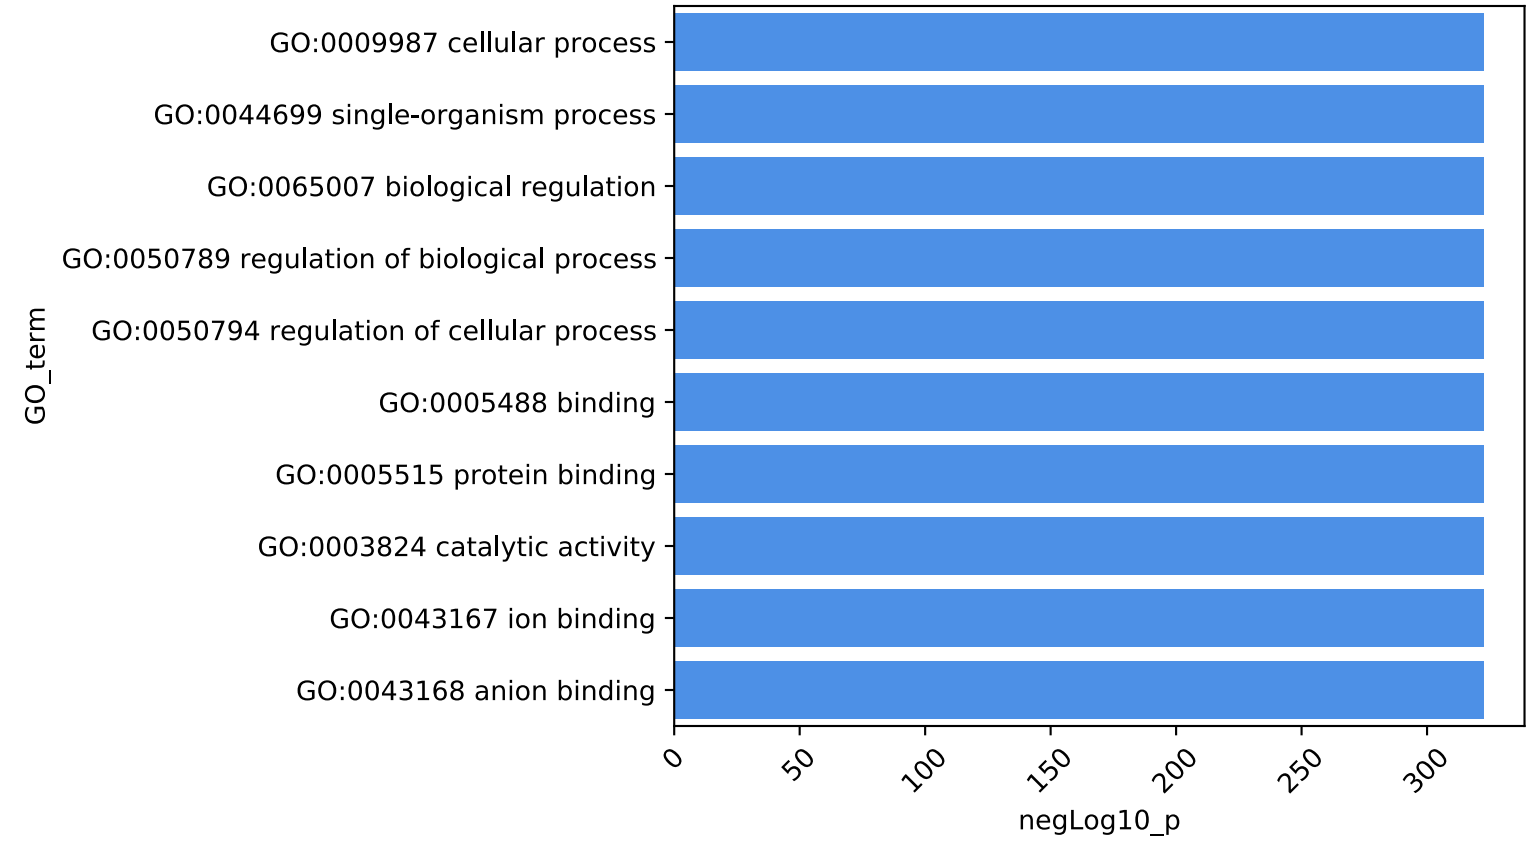

# TxEnh1

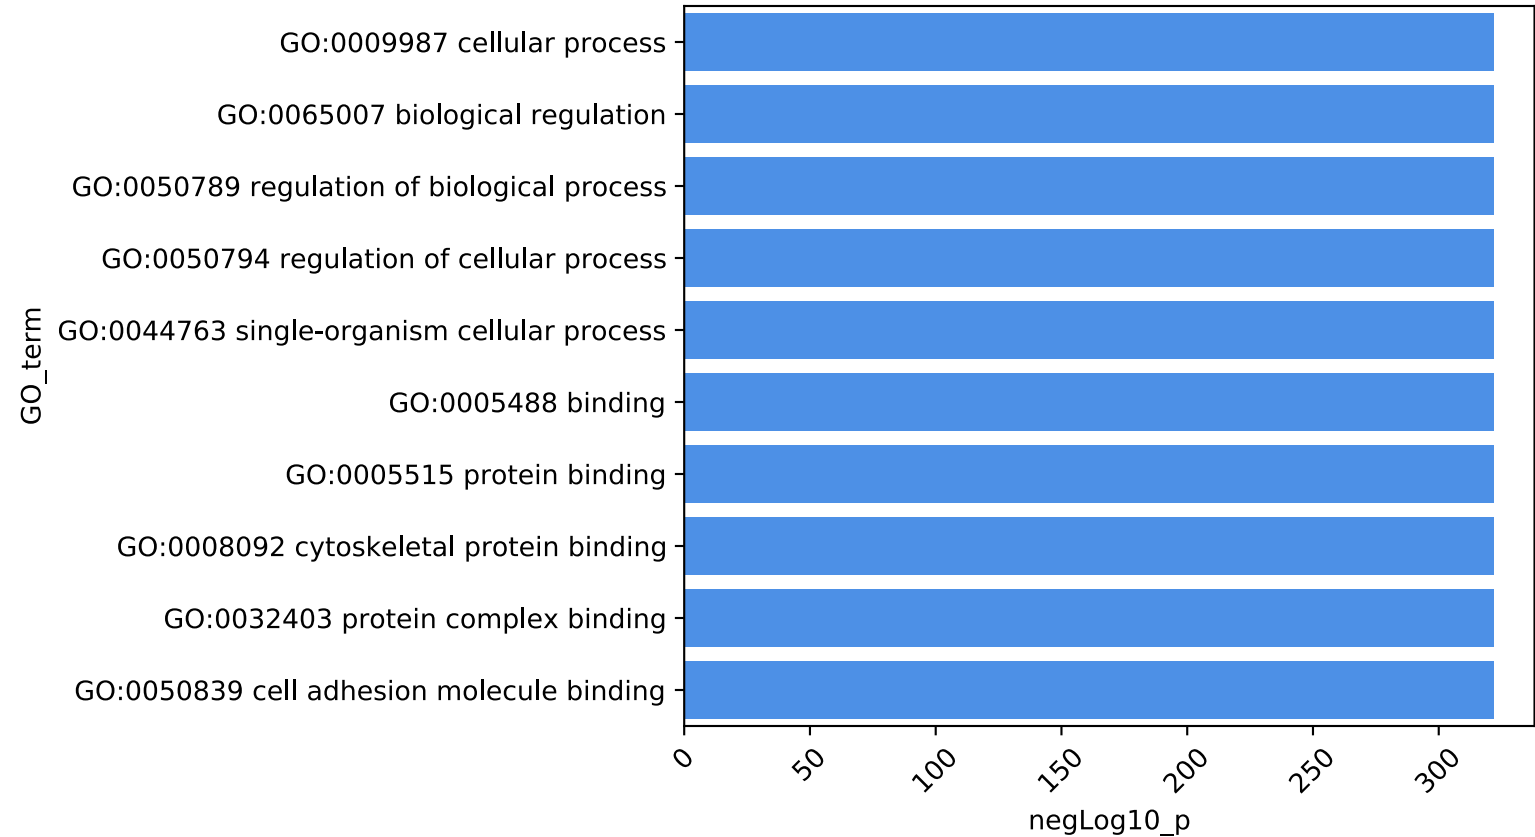

## TxEnh2

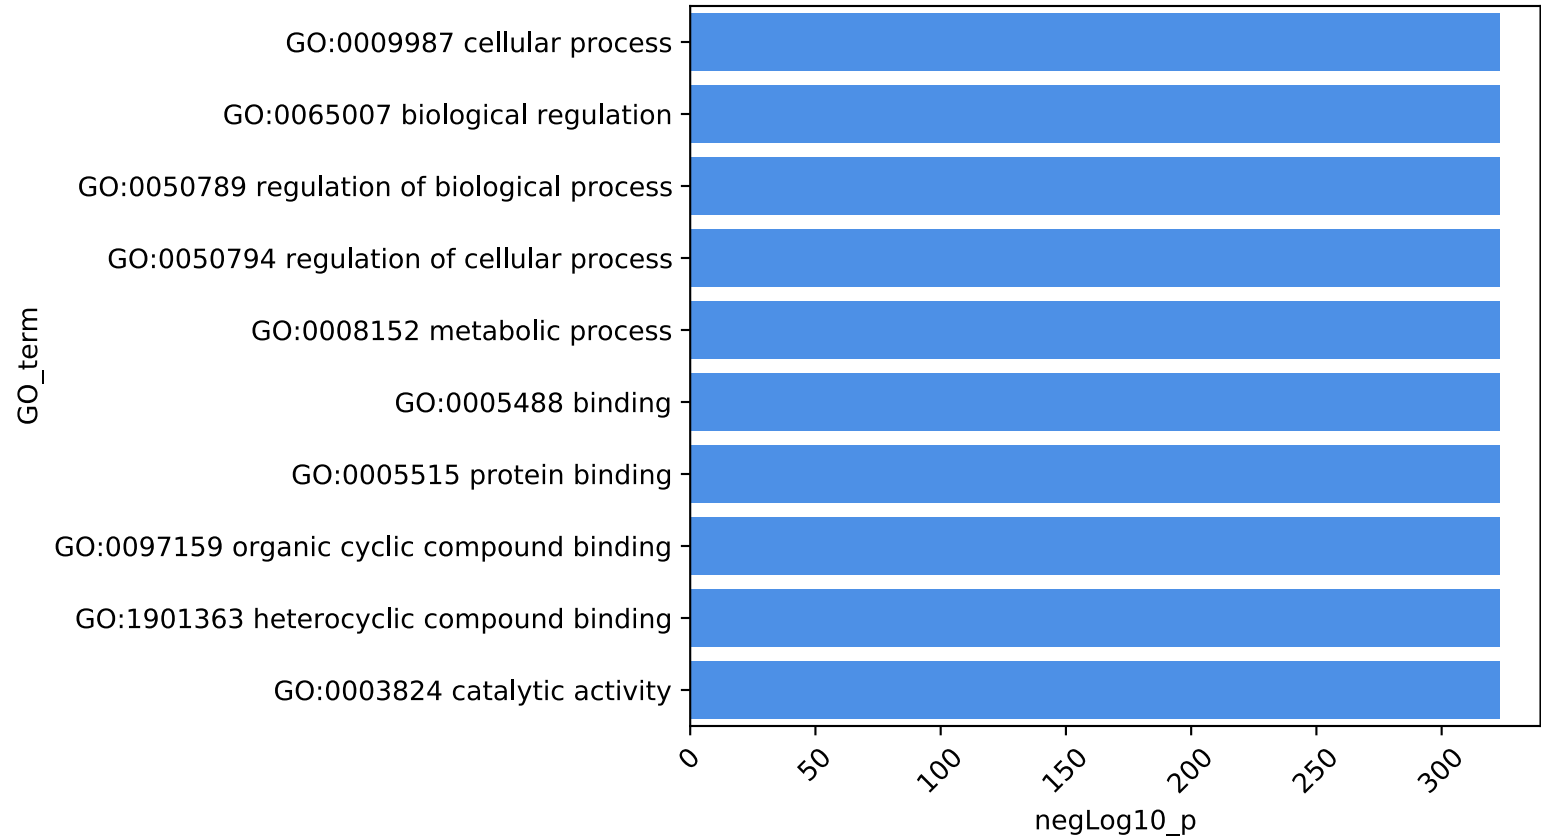

### TxEnh3

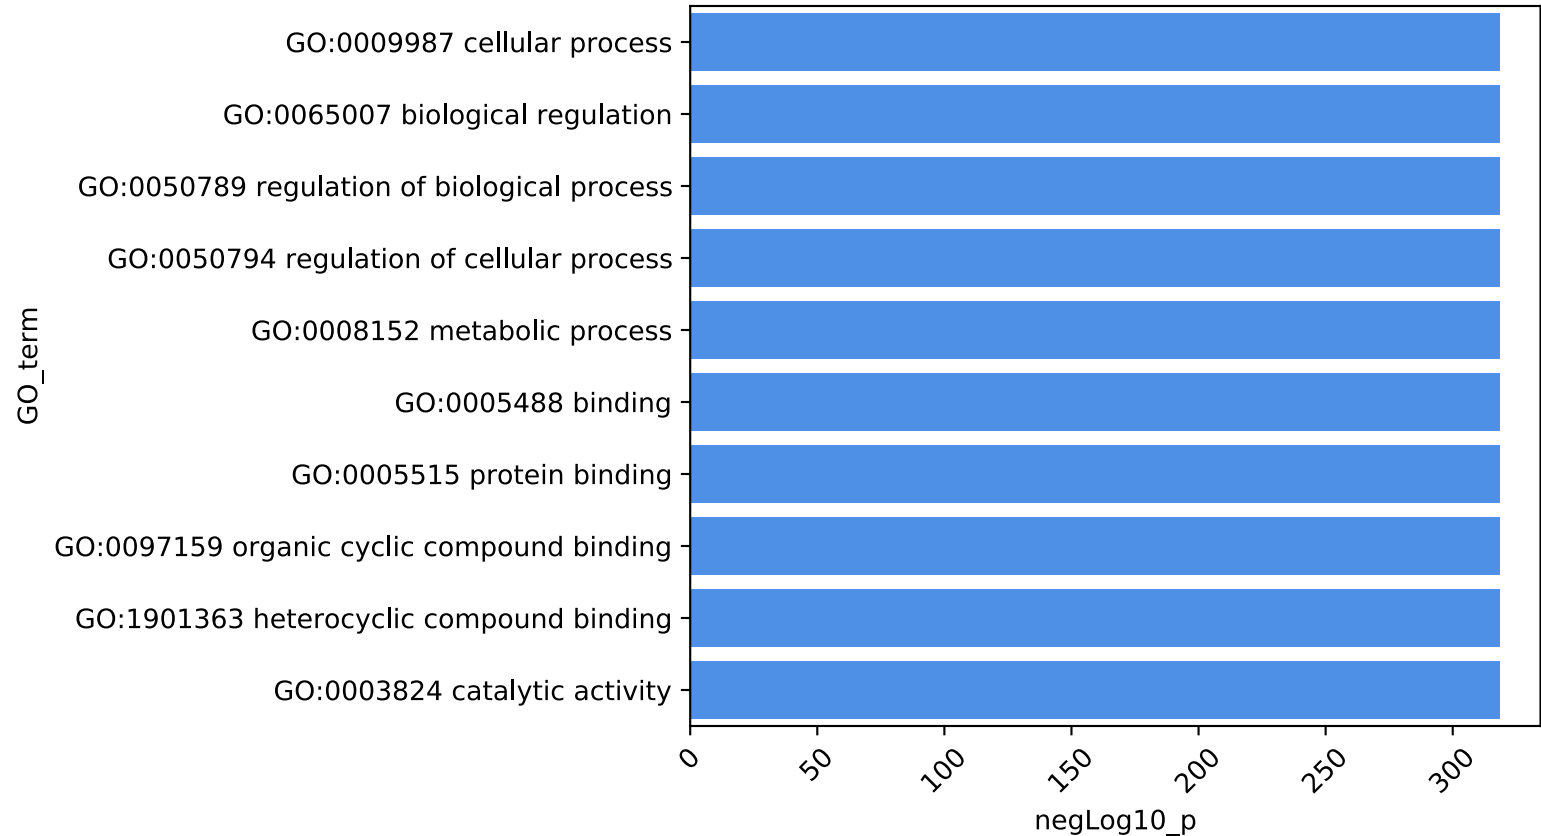

# TxEnh4

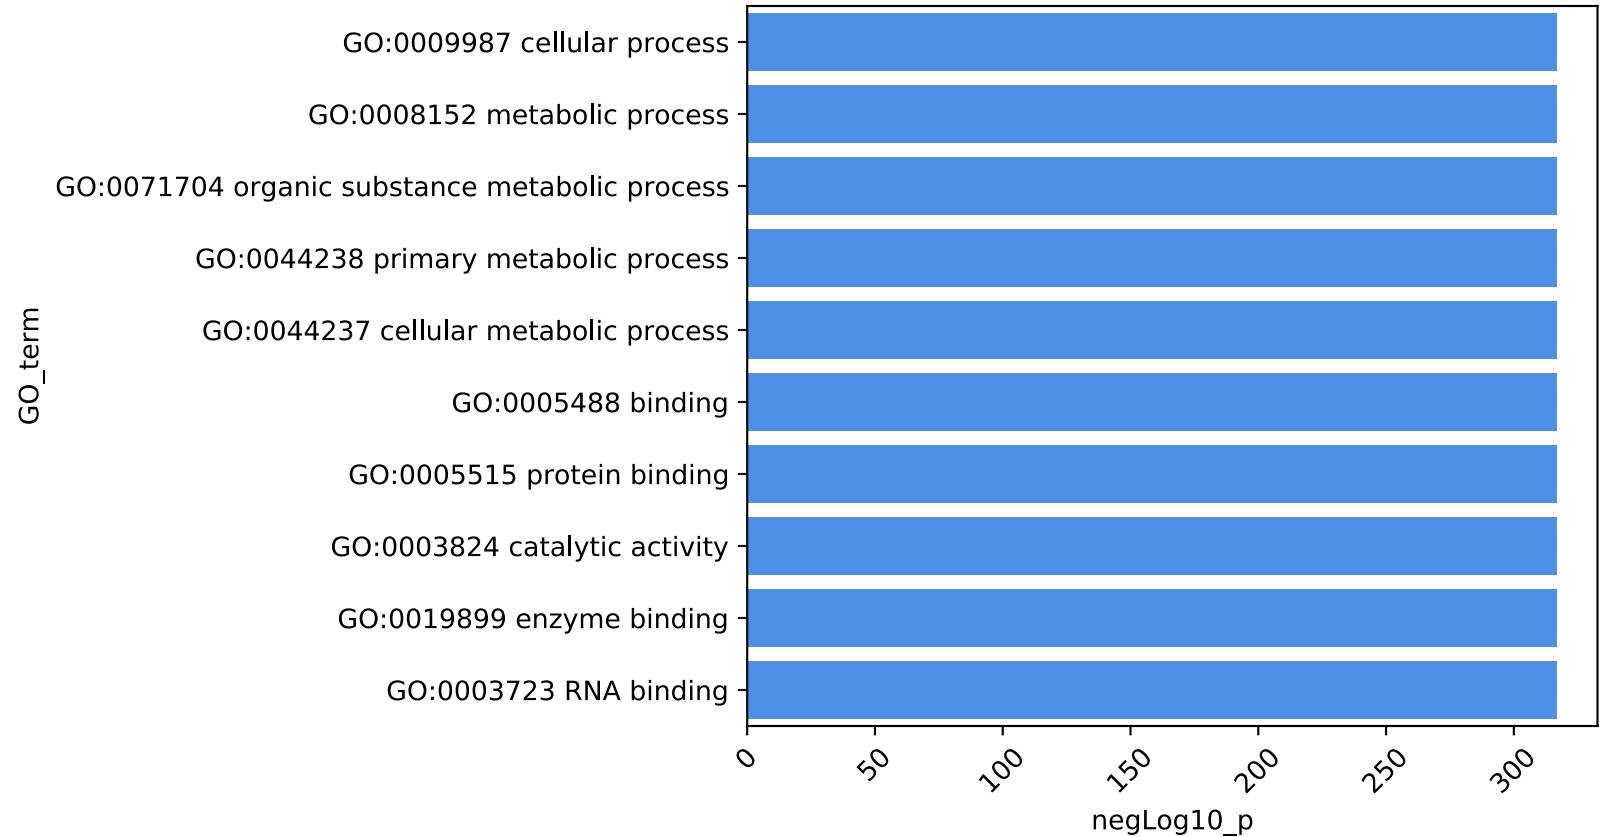

# TxEnh5

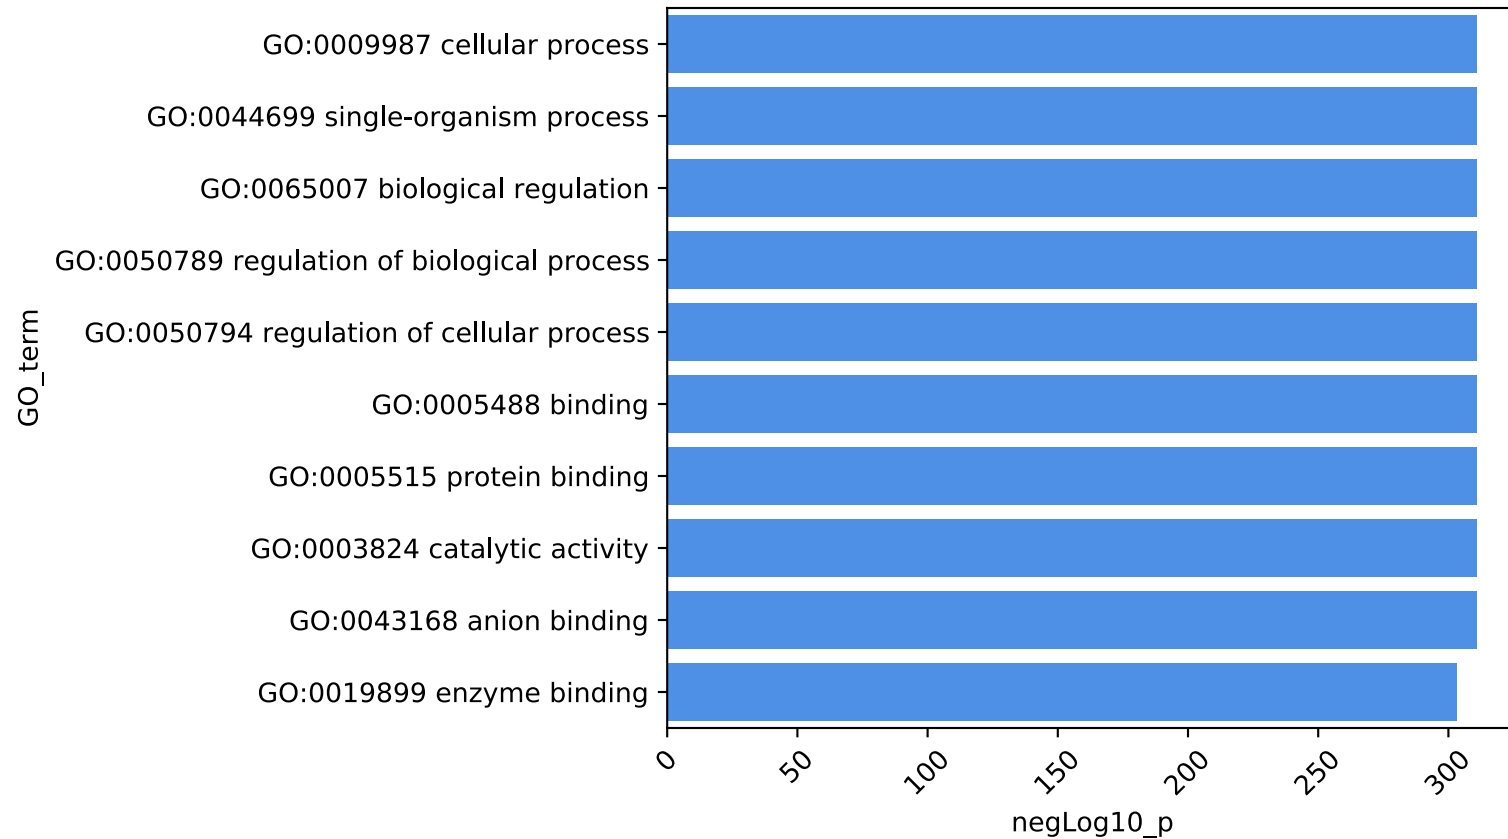



## TxEnh6

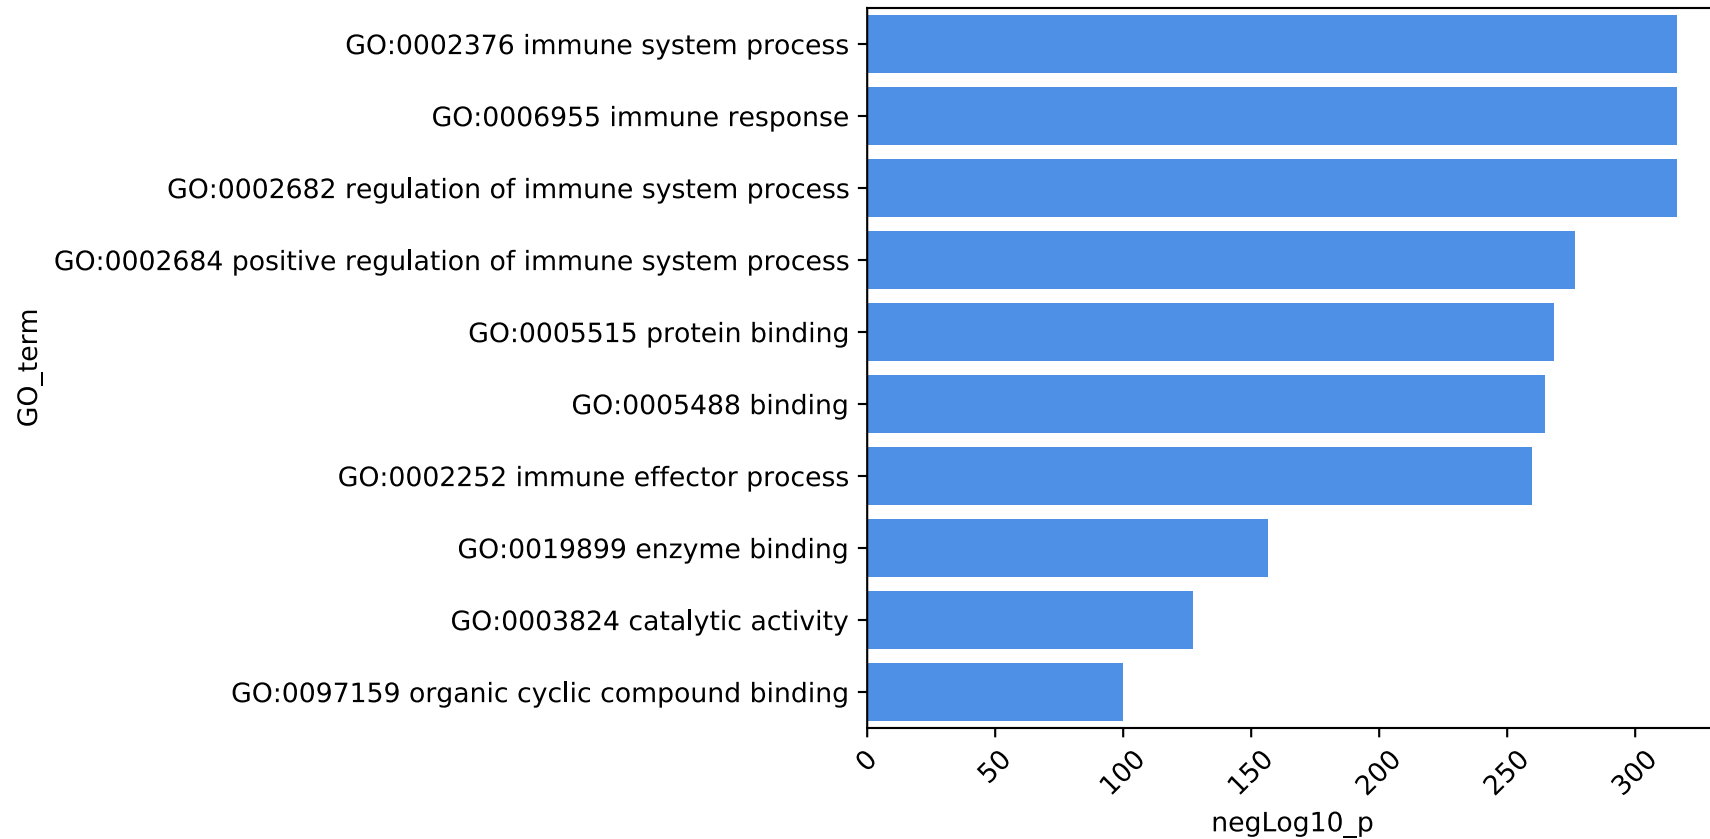

# TxEnh7

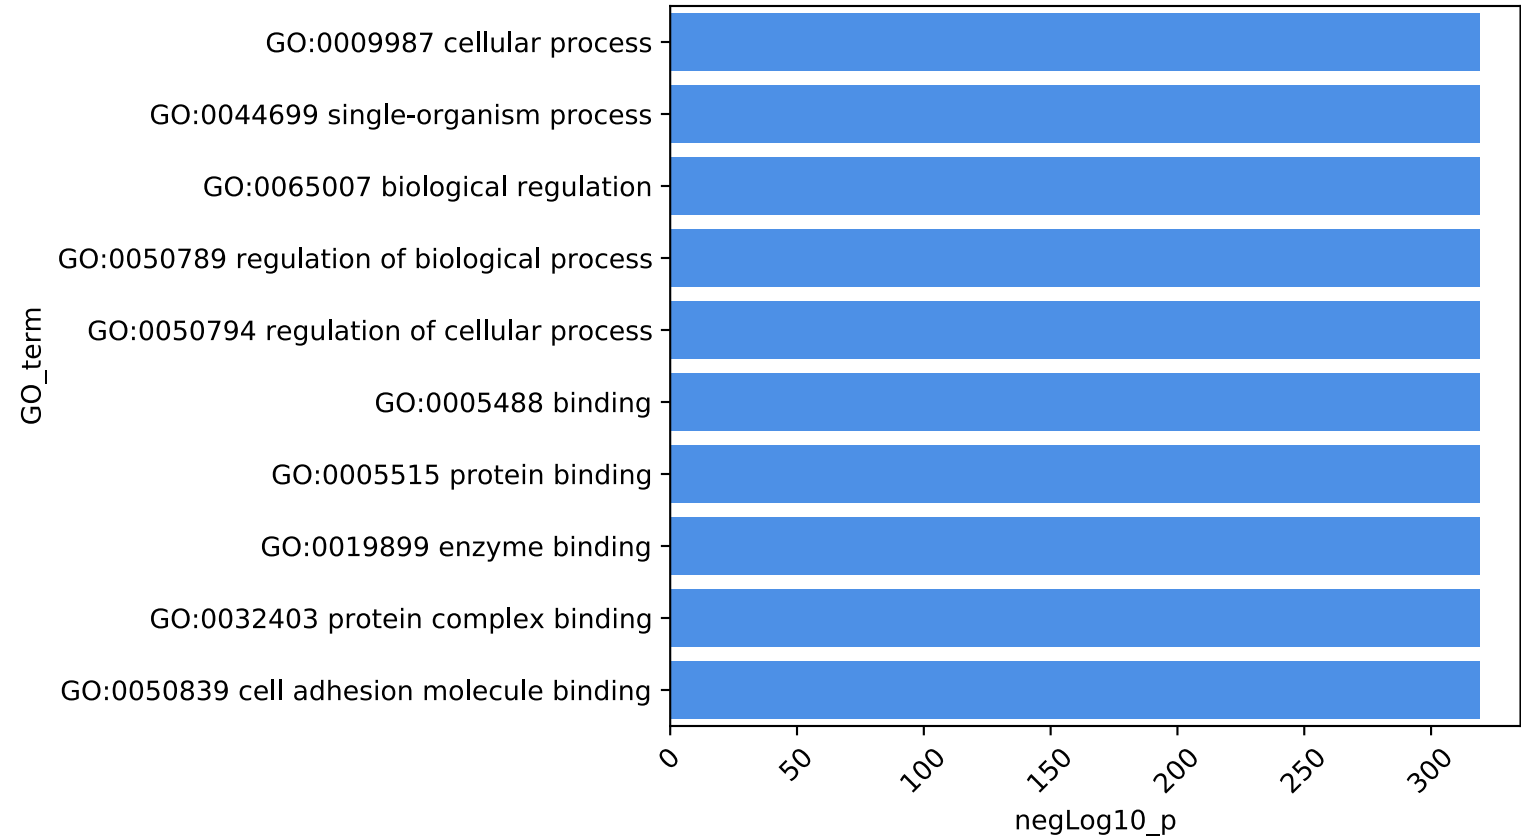

# TxEnh8

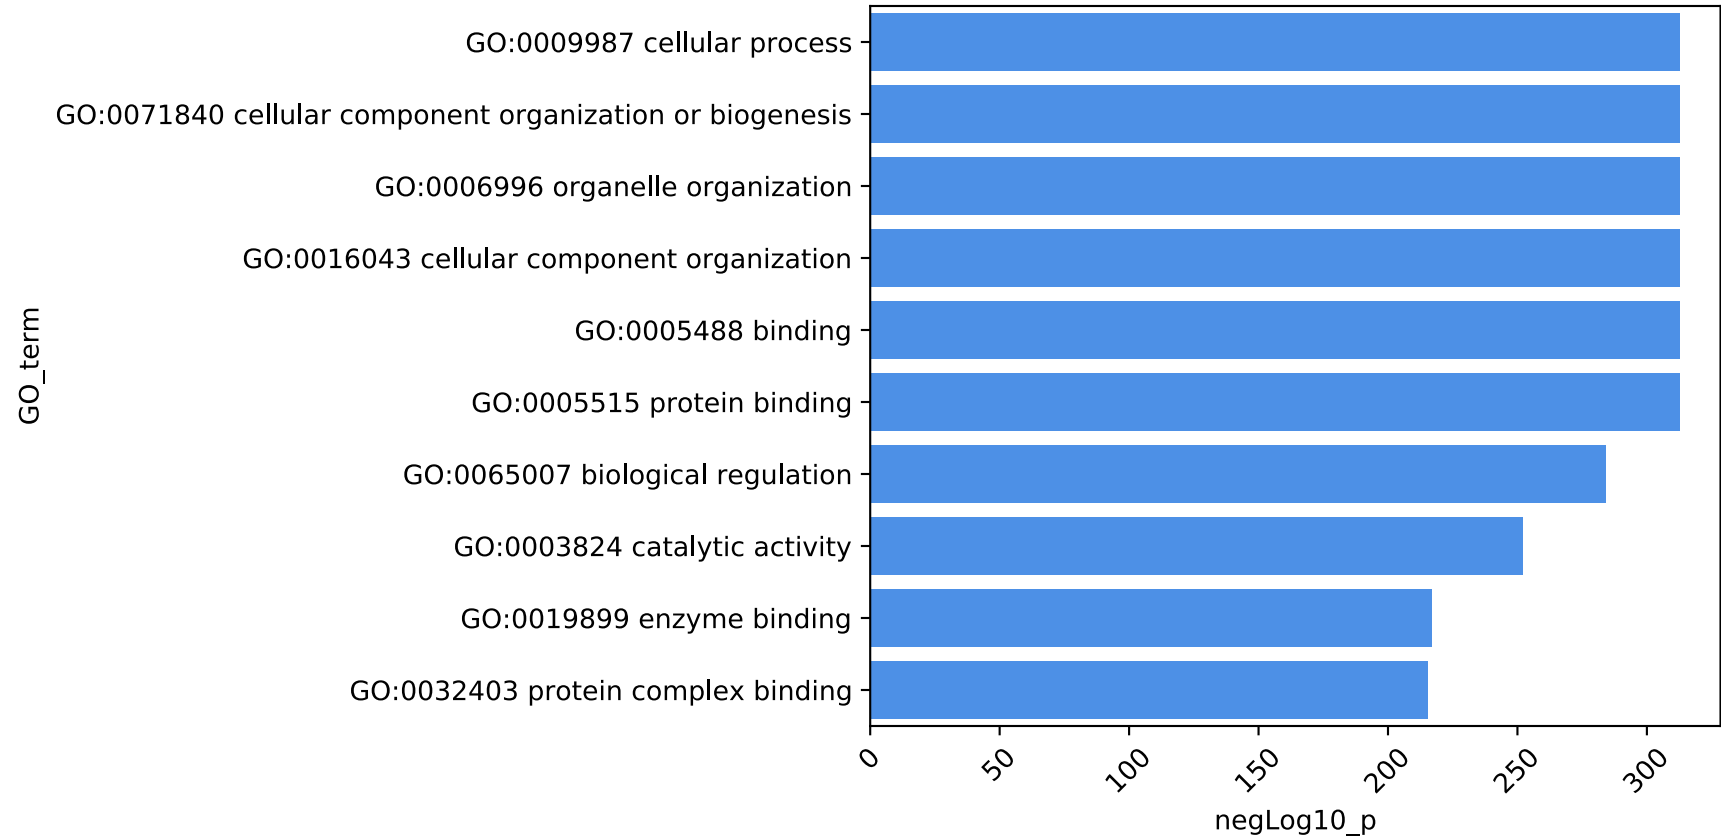

# TxEx1

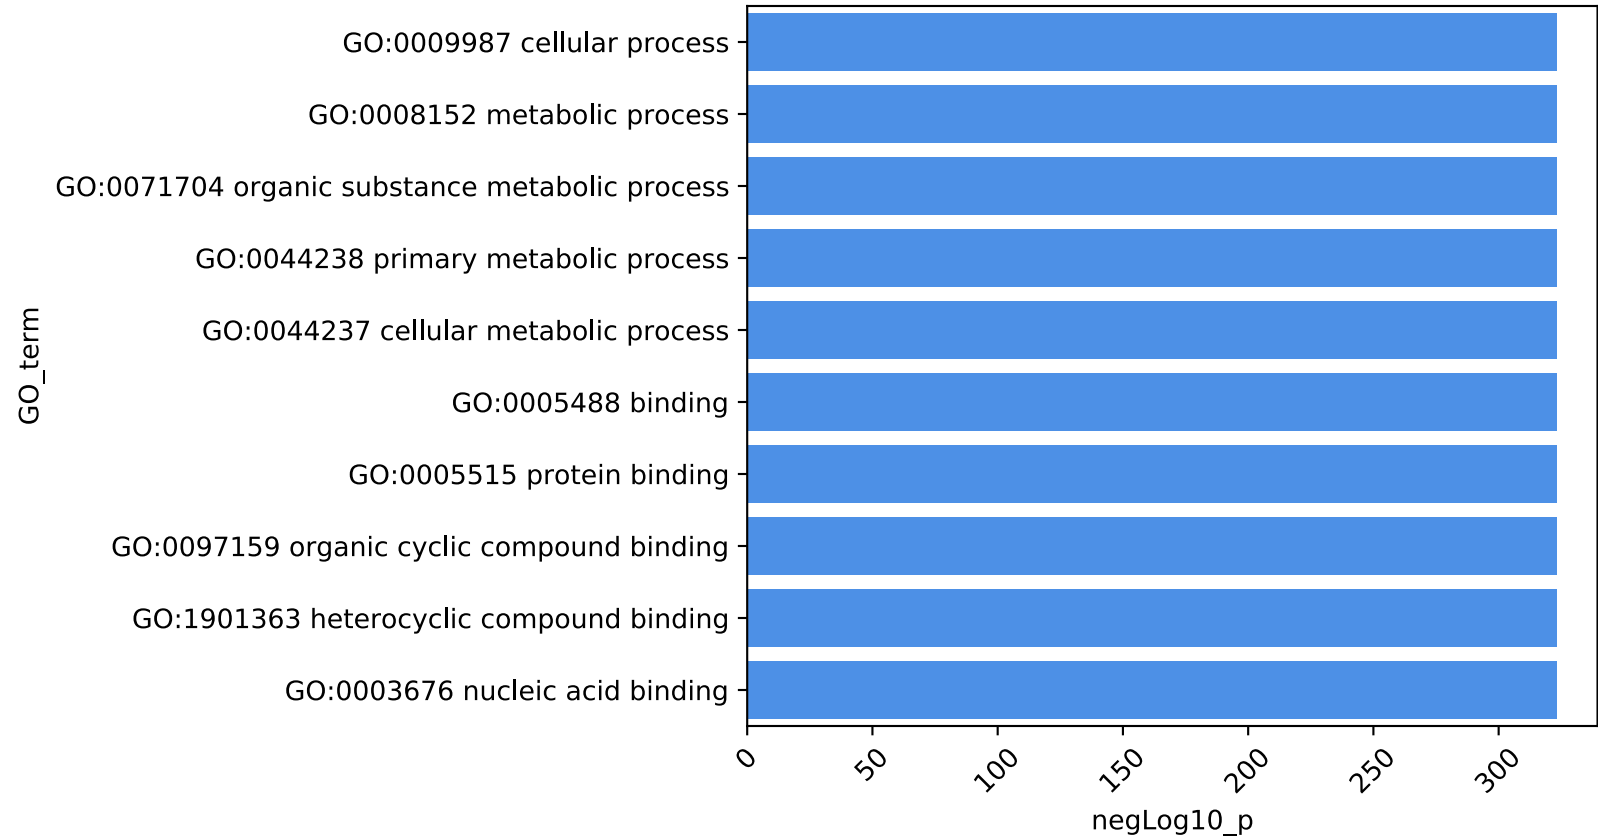

## TxEx2

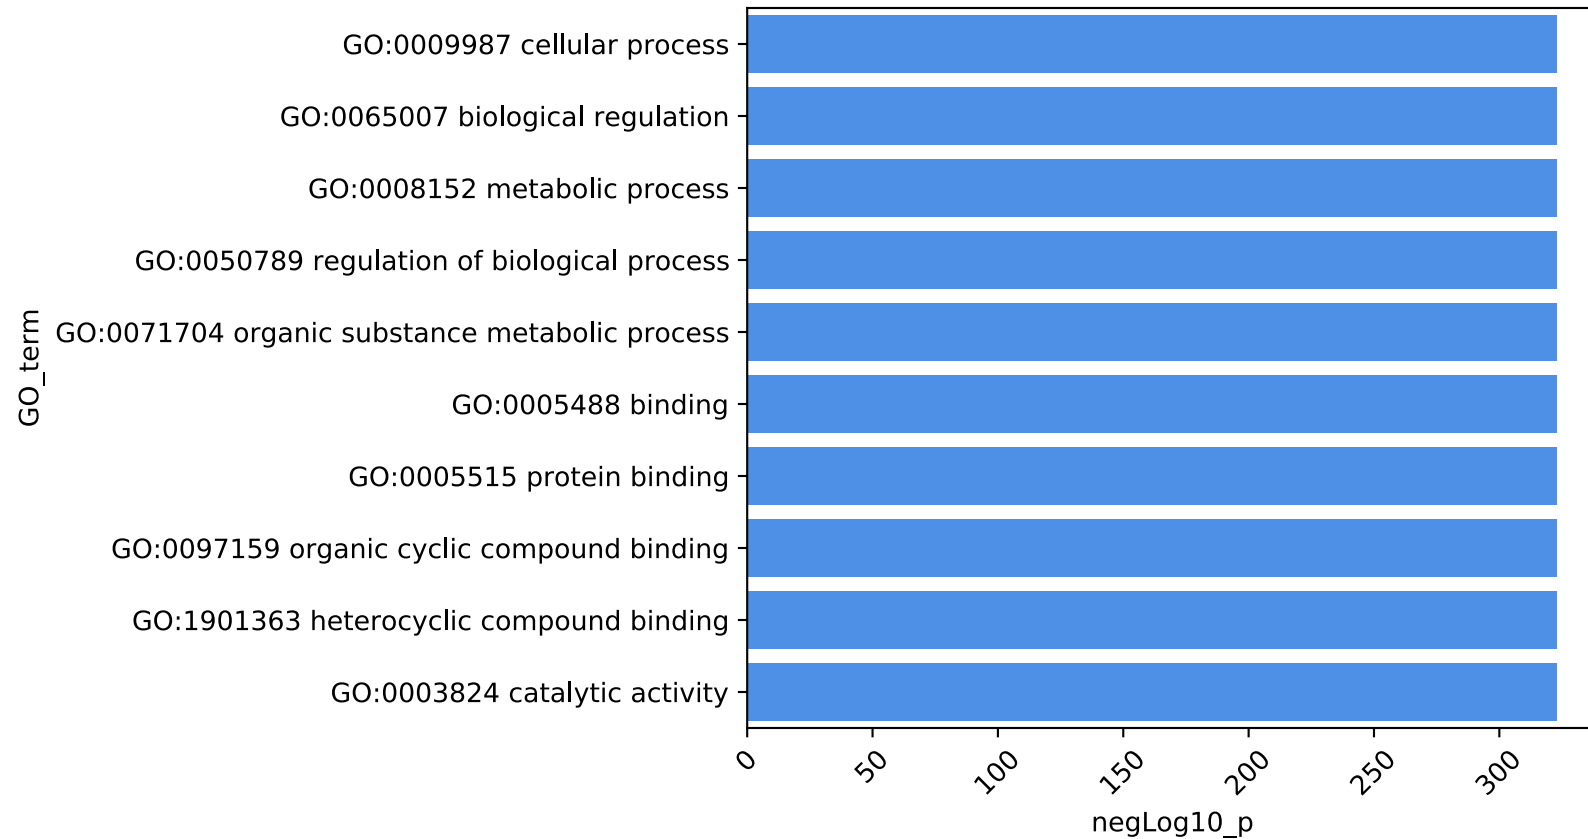

# TxEx3

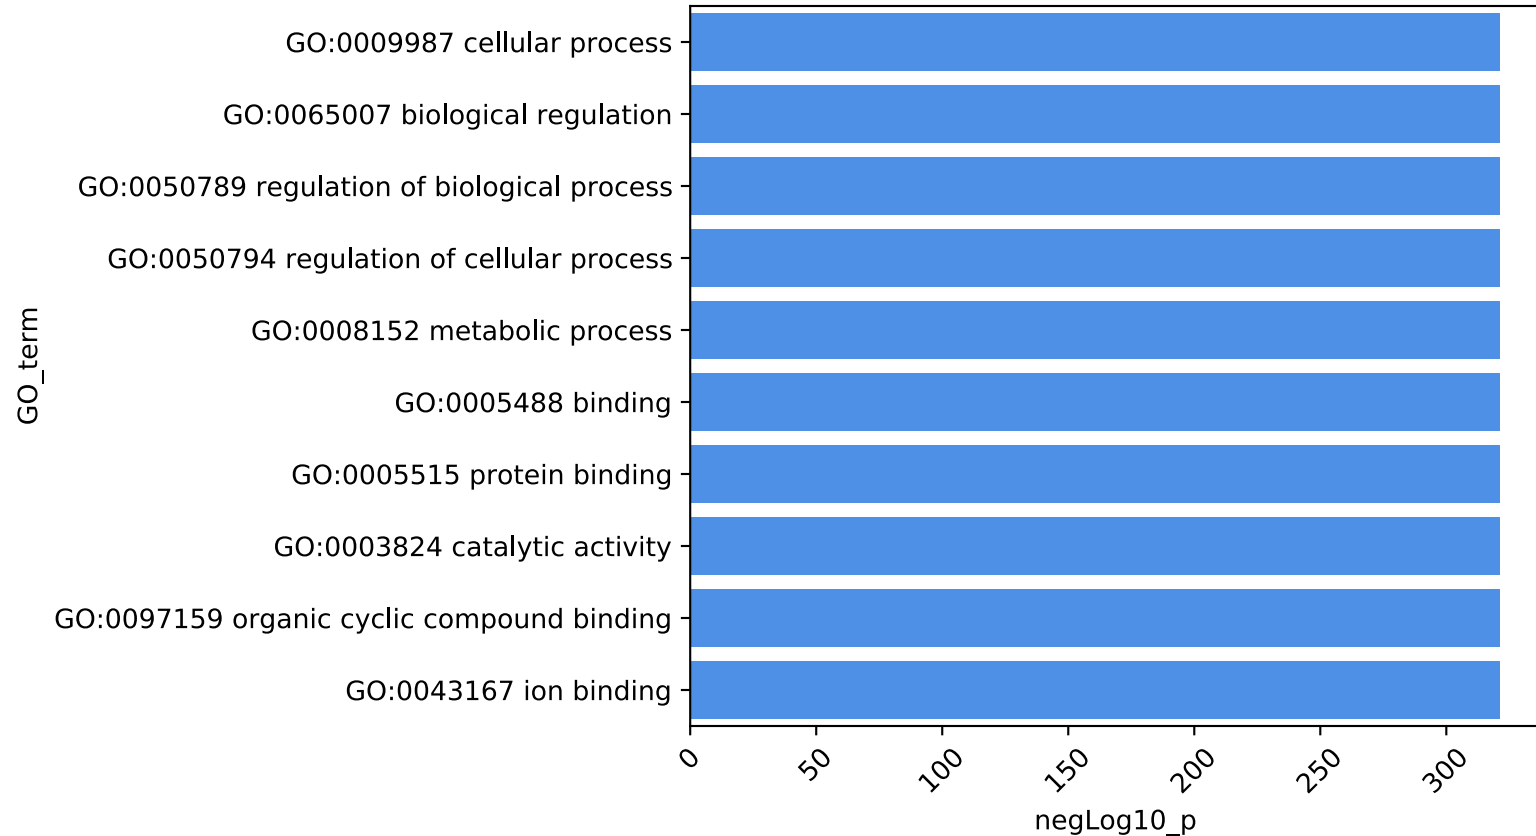

TxEx4

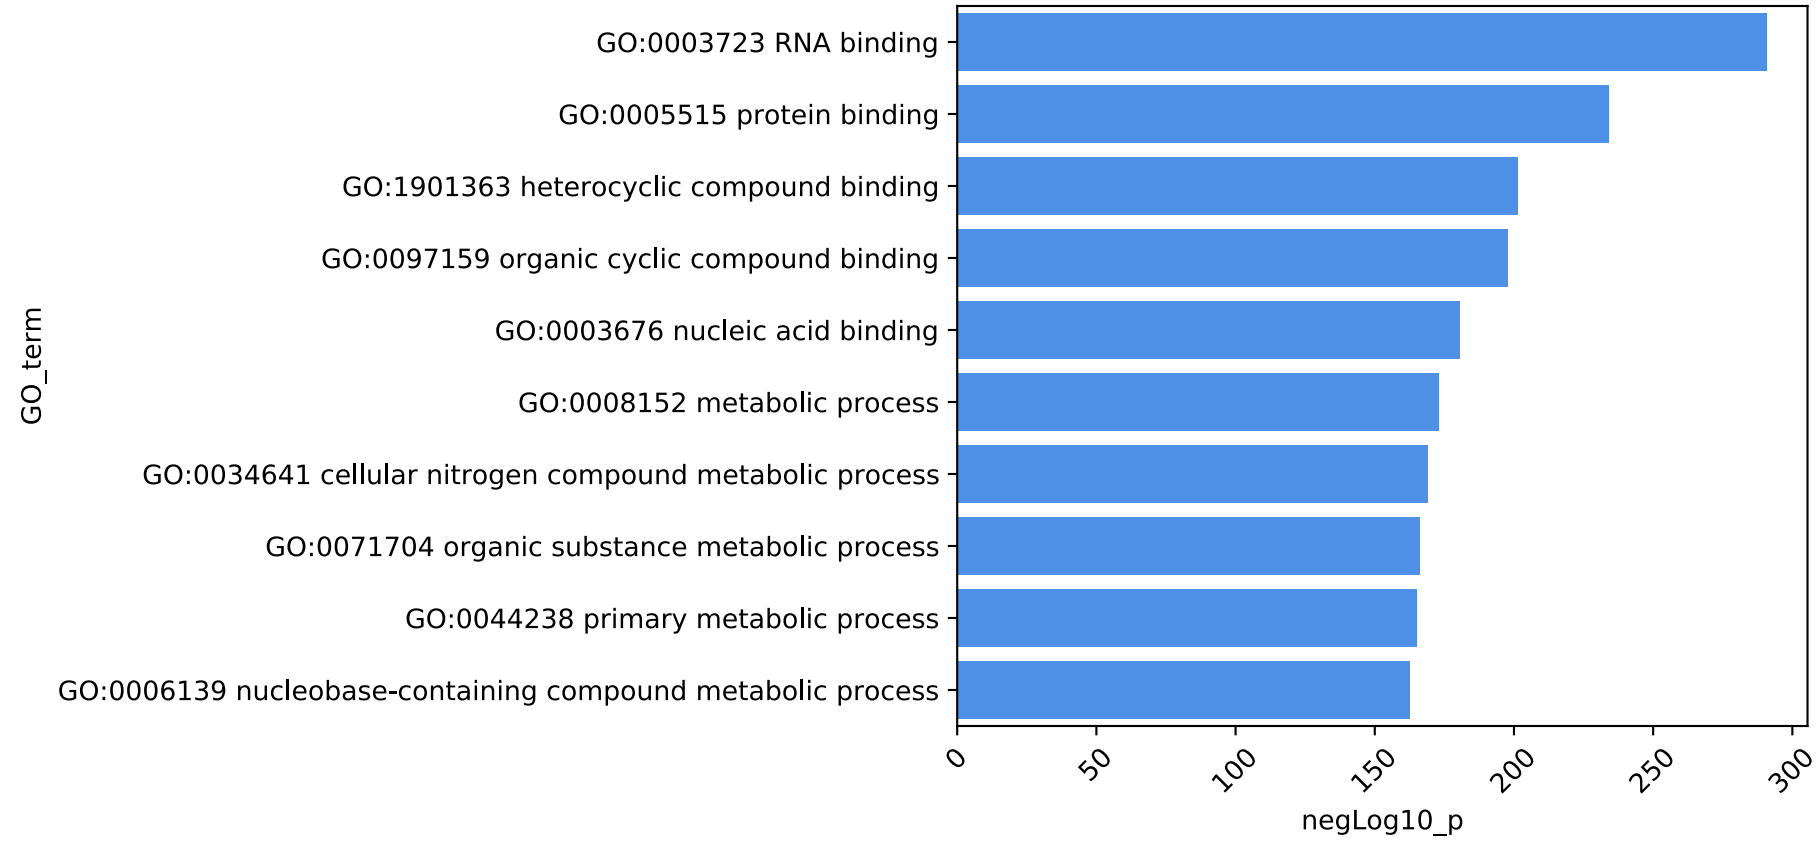

TxWk1

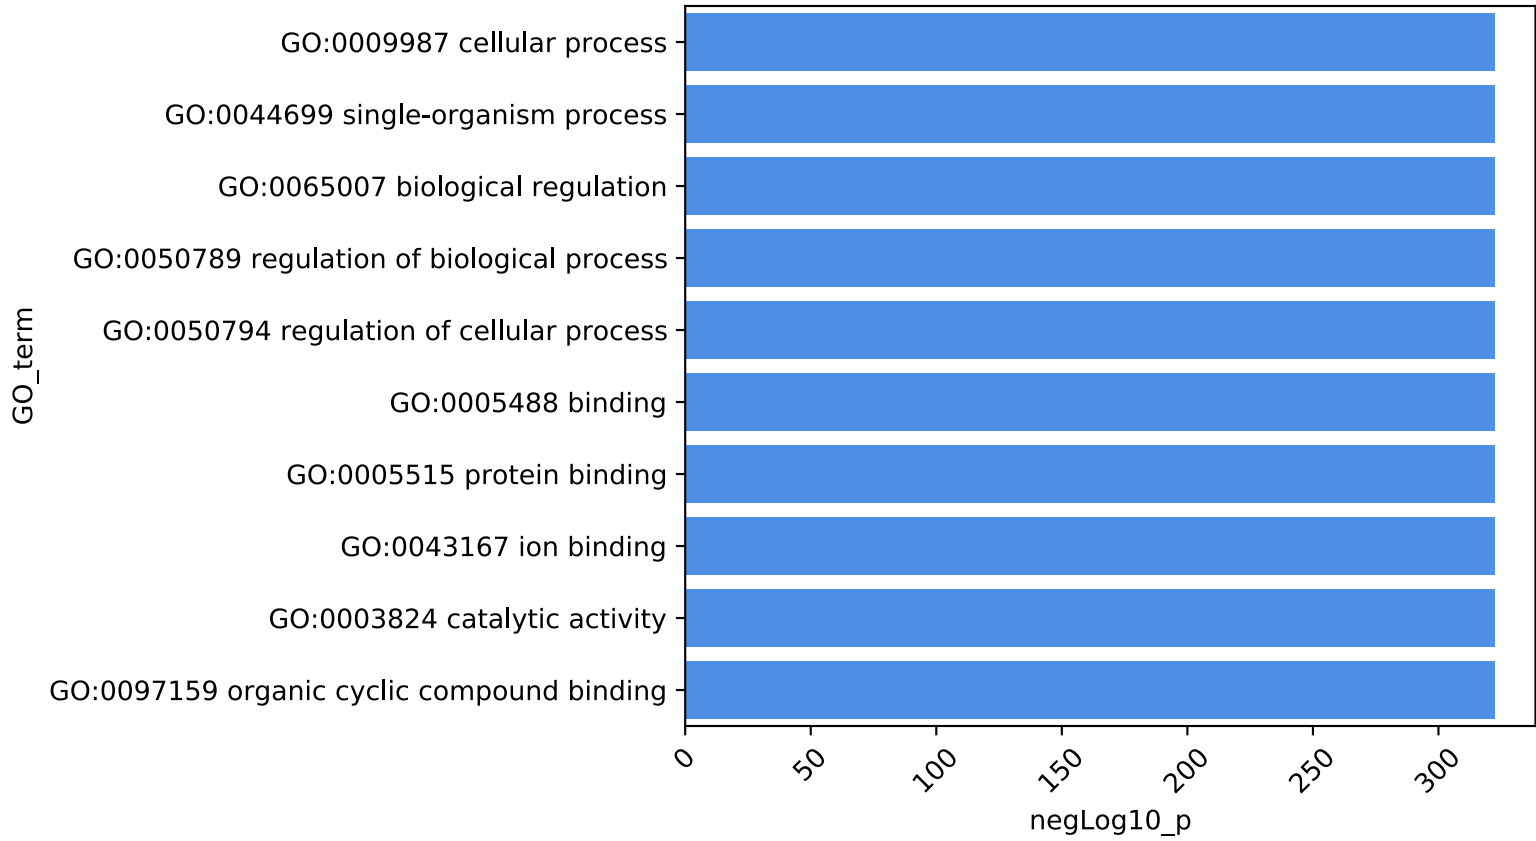



TxWk2

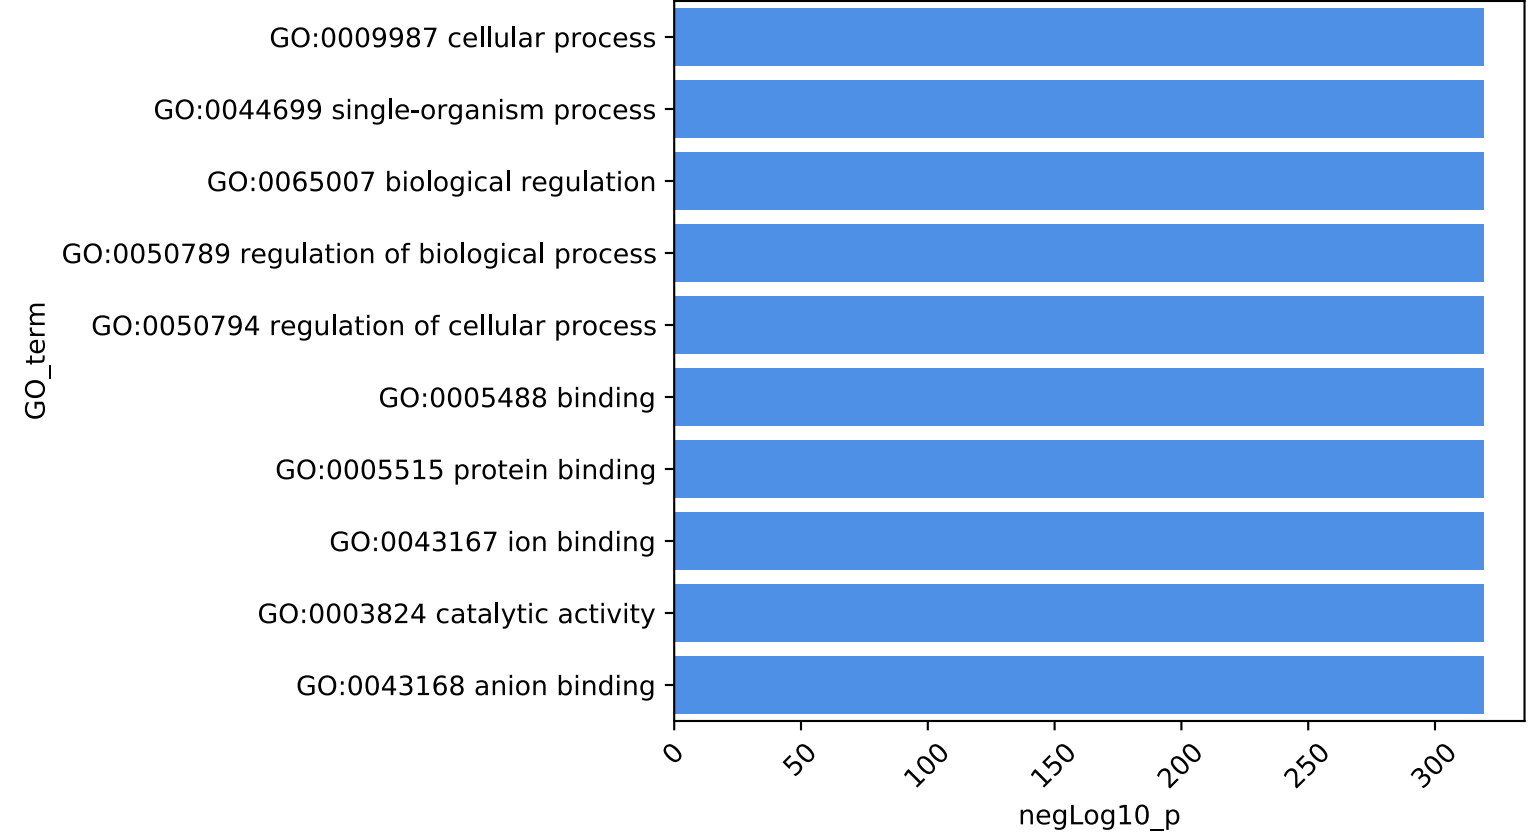

znf1

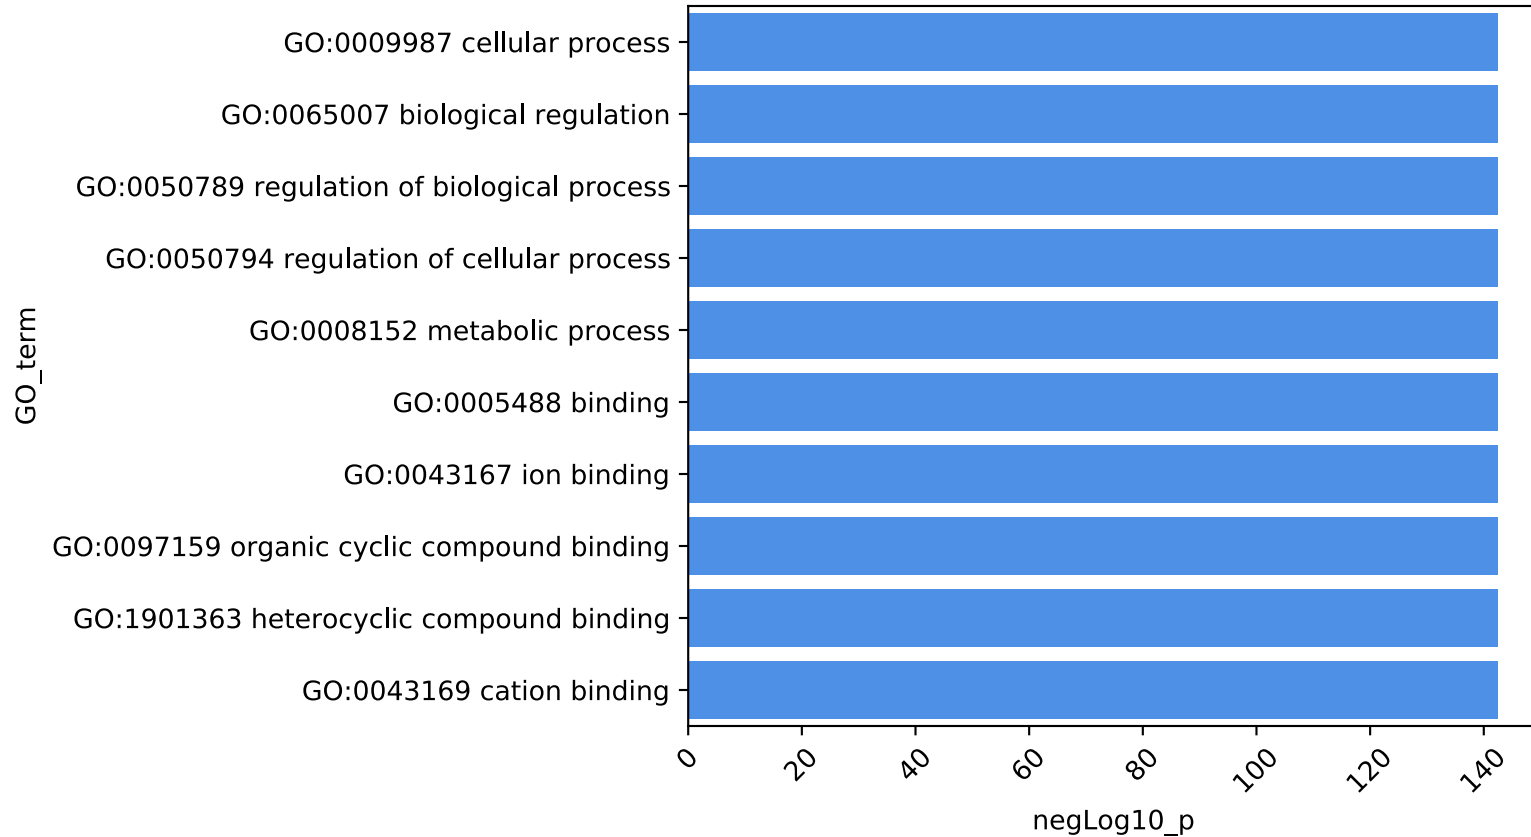

znf2

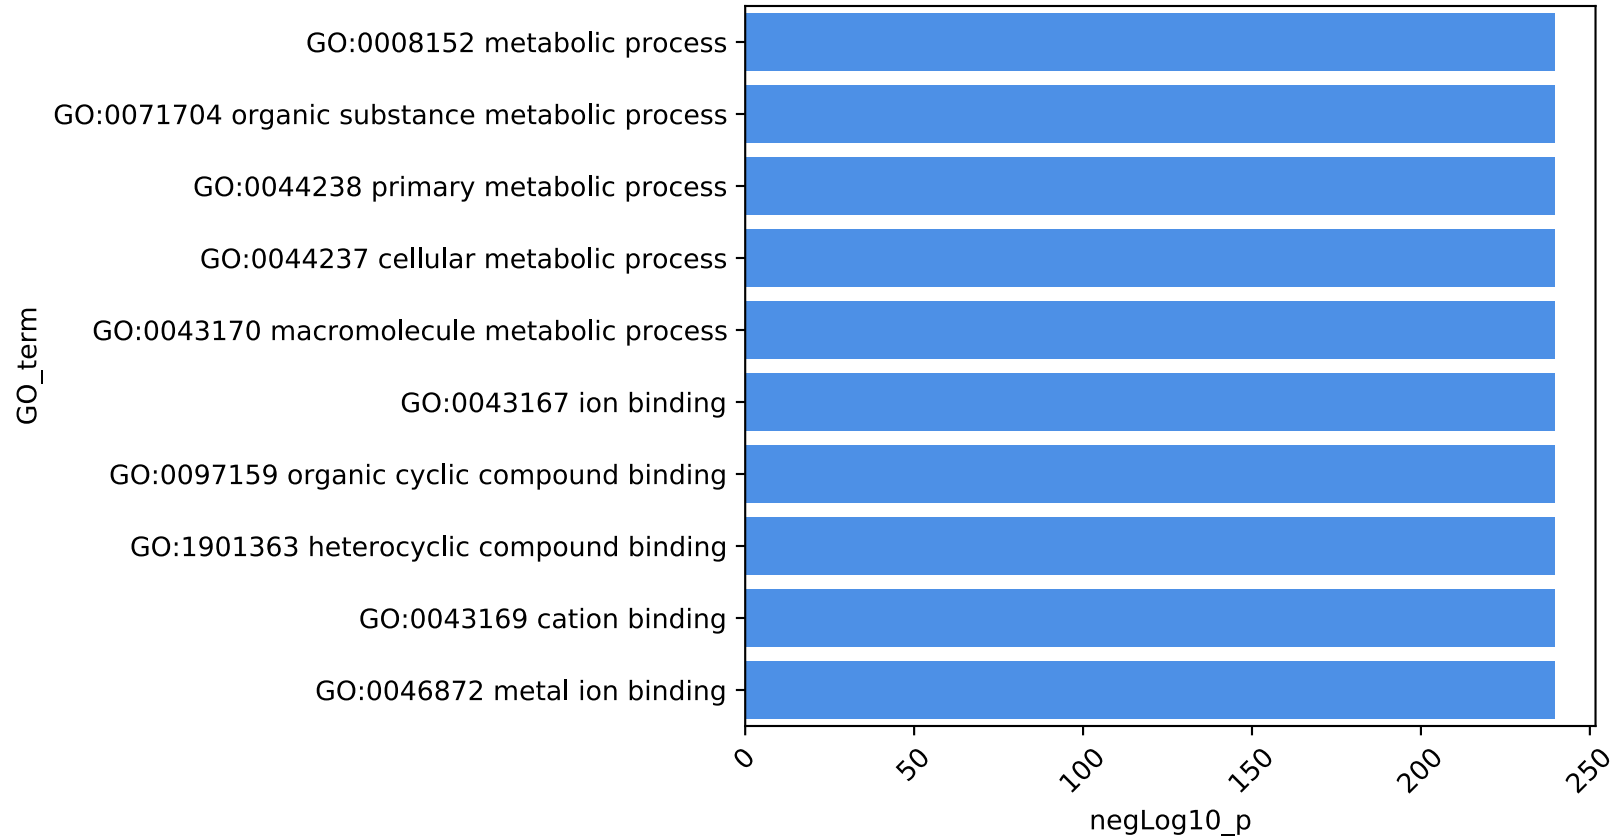

Supplement: 13059_2021_2572_MOESM2_ESM.pdf [file 13059_2021_2572_MOESM2_ESM.pdf]
